# Supplementary material for: Regioselective O/C phosphorylation of α-chloroketones: a general method for the synthesis of enol phosphates and β-ketophosphonates via Perkow/Arbuzov reaction
Source: Royal Society of Chemistry journal article supplement (doi:10.1039/d0ra05140c), 2020-01-01
Supplement: d0ra05140c1.pdf [file d0ra05140c1.pdf]

**Regioselective O/C Phosphorylation of  $\alpha$ -Chloroketones: A  
General Method for the Synthesis of Enol Phosphates and  $\beta$ -  
Ketophosphonates via Perkow/Arbuzov Reaction**

Yuepeng Cao, Zhenhua Gao, Junchen Li, Xiaojing Bi, Ling Yuan, Chengxin Pei,  
Yongbiao Guo\*, Enxue Shi\*

State Key Laboratory of NBC Protection for Civilian, Beijing 102205, P. R. China

\*E-mail: [van87120@126.com](mailto:van87120@126.com); [exshi@sina.com](mailto:exshi@sina.com)

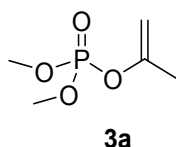

**dimethyl prop-1-en-2-yl phosphate (3a).** Colorless oil, yield 75%; <sup>1</sup>H NMR(600 MHz, CDCl<sub>3</sub>): δ (ppm) 4.72 (s, 1H), 4.48 (s, 1H), 3.78 (d, J = 11.3 Hz, 6H), 1.91 (s, 3H). <sup>13</sup>C NMR(151 MHz, CDCl<sub>3</sub>): δ (ppm) 152.0 (d, J = 8.4 Hz), 98.1 (d, J = 4.9 Hz), 54.5 (d, J = 6.2 Hz) (2), 20.5 (d, J = 5.0 Hz). <sup>31</sup>P NMR(243 MHz, CDCl<sub>3</sub>): δ (ppm) -4.6. HRMS (m/z) calcd for C<sub>5</sub>H<sub>12</sub>O<sub>4</sub>P[M+H]<sup>+</sup> 167.04732, found 167.04636.

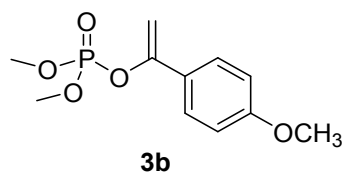

**1-(4-methoxyphenyl)vinyl dimethyl phosphate (3b).** Colorless oil, yield 88%; <sup>1</sup>H NMR(600 MHz, CDCl<sub>3</sub>): δ (ppm) 7.68-7.41 (m, 1H), 6.87 (d, J = 8.9 Hz, 1H), 5.16 (t, J = 2.7 Hz, 1H), 5.12-5.04 (m, 1H). 3.83 (d, J = 11.3 Hz, 6H), 3.80 (s, 3H). <sup>13</sup>C NMR(151 MHz, CDCl<sub>3</sub>): δ (ppm) 160.2, 152.0 (d, J = 7.8 Hz), 126.6, 113.7, 95.6 (d, J = 3.6 Hz), 55.2, 54.8 (d, J = 6.1 Hz) (2). <sup>31</sup>P NMR(243 MHz, CDCl<sub>3</sub>): δ (ppm) -4.0. HRMS (m/z) calcd for C<sub>11</sub>H<sub>16</sub>O<sub>5</sub>P[M+H]<sup>+</sup> 259.07354, found 259.07237.

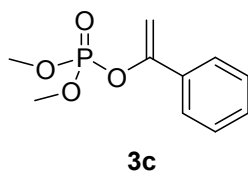

**dimethyl (1-phenylvinyl) phosphate (3c).** Colorless oil, yield 90%; <sup>1</sup>H NMR(600 MHz, CDCl<sub>3</sub>): δ (ppm) 7.64-7.53 (m, 2H), 7.40-7.29 (m, 3H), 5.29 (t, J = 2.8 Hz, 1H), 5.21 (dd, J = 2.9, 2.2 Hz, 1H), 3.83 (d, J = 11.3 Hz, 6H). <sup>13</sup>C NMR(151 MHz, CDCl<sub>3</sub>): δ (ppm) 152.1 (d, J = 7.8 Hz), 133.9 (d, J = 6.8 Hz), 129.1, 128.3 (2), 125.0 (2), 97.3 (d, J = 3.5 Hz), 54.78 (d, J = 6.1 Hz) (2). <sup>31</sup>P NMR(243 MHz, CDCl<sub>3</sub>): δ (ppm) -4.0. HRMS (m/z) calcd for C<sub>10</sub>H<sub>14</sub>O<sub>4</sub>P[M+H]<sup>+</sup> 229.06297, found 229.06194.

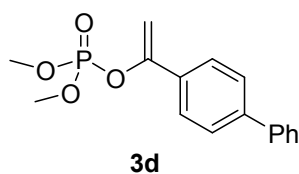

**1-([1,1'-biphenyl]-4-yl)vinyl dimethyl phosphate (3d).** Colorless oil, yield 95%; <sup>1</sup>H NMR(600 MHz, CDCl<sub>3</sub>): δ (ppm) 7.67 (d, J = 8.4 Hz, 2H), 7.64-7.56 (m, 3H), 7.45 (t,

$J = 7.7$  Hz, 2H), 7.37 (t,  $J = 7.4$  Hz, 1H), 5.36 (t,  $J = 2.8$  Hz, 1H), 5.30-5.21 (m, 1H), 3.88 (d,  $J = 11.3$  Hz, 6H).  $^{13}\text{C}$  NMR(151 MHz,  $\text{CDCl}_3$ ):  $\delta$  (ppm) 152.0 (d,  $J = 7.7$  Hz), 142.0, 140.3, 132.9 (d,  $J = 6.8$  Hz), 128.8, 127.7, 127.1 (2), 127.0 (2), 125.6 (2), 97.4 (d,  $J = 3.6$  Hz), 54.9 (d,  $J = 6.1$  Hz) (2).  $^{31}\text{P}$  NMR(243 MHz,  $\text{CDCl}_3$ ):  $\delta$  (ppm) -4.0. HRMS (m/z) calcd for  $\text{C}_{16}\text{H}_{18}\text{O}_4\text{P}[\text{M}+\text{H}]^+$  305.09427, found 305.09266.

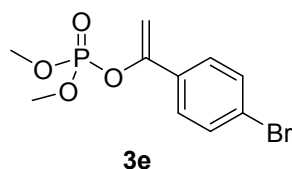

**1-(4-bromophenyl)vinyl dimethyl phosphate (3e).** Colorless oil, yield 94%;  $^1\text{H}$  NMR(600 MHz,  $\text{CDCl}_3$ ):  $\delta$  (ppm) 7.48 (d,  $J = 8.5$  Hz, 2H), 7.44 (d,  $J = 8.7$  Hz, 2H), 5.29 (t,  $J = 2.8$  Hz, 1H), 5.24-5.21 (m, 1H), 3.84 (d,  $J = 11.3$  Hz, 6H).  $^{13}\text{C}$  NMR(151 MHz,  $\text{CDCl}_3$ ):  $\delta$  (ppm) 151.2 (d,  $J = 7.6$  Hz), 132.9 (d,  $J = 6.8$  Hz), 131.5 (2), 126.6 (2), 123.2, 97.9 (d,  $J = 3.6$  Hz), 54.8 (d,  $J = 6.1$  Hz) (2).  $^{31}\text{P}$  NMR(243 MHz,  $\text{CDCl}_3$ ):  $\delta$  (ppm) -4.0. HRMS (m/z) calcd for  $\text{C}_{10}\text{H}_{13}\text{BrO}_4\text{P}[\text{M}+\text{H}]^+$  306.97348, found 306.97174.

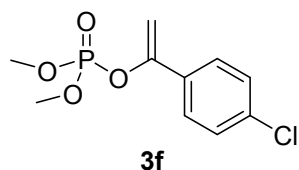

**1-(4-chlorophenyl)vinyl dimethyl phosphate (3f).** Colorless oil, yield 95%;  $^1\text{H}$  NMR(600 MHz,  $\text{CDCl}_3$ ):  $\delta$  (ppm) 7.52-7.44 (m, 2H), 7.36-7.26 (m, 2H), 5.30-5.14 (m, 2H), 3.81 (d,  $J = 11.4$  Hz, 6H).  $^{13}\text{C}$  NMR(151 MHz,  $\text{CDCl}_3$ ):  $\delta$  (ppm) 151.1 (d,  $J = 7.6$  Hz), 135.0, 132.4 (d,  $J = 6.8$  Hz), 128.5 (2), 126.4 (2), 97.8 (d,  $J = 3.6$  Hz), 54.8 (d,  $J = 6.1$  Hz) (2).  $^{31}\text{P}$  NMR(243 MHz,  $\text{CDCl}_3$ ):  $\delta$  (ppm) -4.0. HRMS (m/z) calcd for  $\text{C}_{10}\text{H}_{13}\text{ClO}_4\text{P}[\text{M}+\text{H}]^+$  263.02400, found 263.02278.

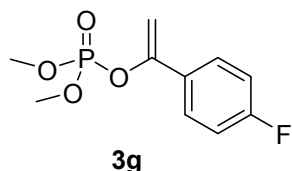

**1-(4-fluorophenyl)vinyl dimethyl phosphate (3g).** Colorless oil, yield 93%;  $^1\text{H}$  NMR (600 MHz,  $\text{CDCl}_3$ ):  $\delta$  (ppm) 7.64-7.48 (m, 2H), 7.05 (t,  $J = 8.7$  Hz, 2H), 5.24 (t,  $J = 2.8$  Hz, 1H), 5.21-5.19 (m, 1H), 3.86 (d,  $J = 11.3$  Hz, 6H).  $^{13}\text{C}$  NMR (151 MHz,  $\text{CDCl}_3$ ):  $\delta$  (ppm) 163.2 (d,  $J = 2489.2$  Hz), 151.31 (d,  $J = 7.7$  Hz), 130.2 (dd,  $J = 6.8$ , 3.3 Hz), 127.1 (d,  $J = 8.4$  Hz) (2), 115.3 ( $J = 21.8$  Hz) (2), 97.2 (dd,  $J = 3.6$ , 1.5 Hz),

54.9, 54.8.  $^{31}\text{P}$  NMR (243 MHz,  $\text{CDCl}_3$ ):  $\delta$  (ppm) -4.1. HRMS (m/z) calcd for  $\text{C}_{10}\text{H}_{13}\text{FO}_4\text{P}[\text{M}+\text{H}]^+$  247.05355, found 247.05234.

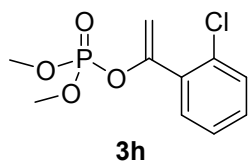

**1-(2-chlorophenyl)vinyl dimethyl phosphate (3h).** Colorless oil, yield 91%;  $^1\text{H}$  NMR(600 MHz,  $\text{CDCl}_3$ ):  $\delta$  (ppm) 7.48-7.46 (m, 1H), 7.40-7.38 (m, 1H), 7.30-7.23 (m, 2H), 5.51-5.29 (m, 1H), 5.16-4.94 (m, 1H), 3.77 (d,  $J = 11.3$  Hz, 6H).  $^{13}\text{C}$  NMR(151 MHz,  $\text{CDCl}_3$ ):  $\delta$  (ppm) 150.3 (d,  $J = 7.8$  Hz), 134.1 (d,  $J = 6.2$  Hz), 132.4, 130.7, 130.2, 130.0, 126.6, 103.28 (d,  $J = 4.3$  Hz). 54.8 (d,  $J = 6.3$  Hz) (2).  $^{31}\text{P}$  NMR (243 MHz,  $\text{CDCl}_3$ ):  $\delta$  (ppm) -4.7. HRMS (m/z) calcd for  $\text{C}_{10}\text{H}_{13}\text{ClO}_4\text{P}[\text{M}+\text{H}]^+$  263.02400, found 263.02275.

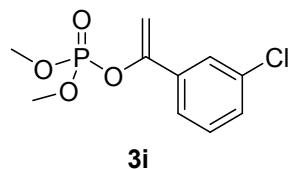

**1-(3-chlorophenyl)vinyl dimethyl phosphate (3i).** Colorless oil, yield 94%;  $^1\text{H}$  NMR(600 MHz,  $\text{CDCl}_3$ ):  $\delta$  (ppm) 7.54 (t,  $J = 1.7$  Hz, 1H), 7.46 (dt,  $J = 7.3, 1.6$  Hz, 1H), 7.34-7.27 (m, 2H), 5.33-5.29 (m, 1H), 5.26 (dd,  $J = 3.1, 2.1$  Hz, 1H), 3.85 (d,  $J = 11.3$  Hz, 6H).  $^{13}\text{C}$  NMR(151 MHz,  $\text{CDCl}_3$ ):  $\delta$  (ppm) 150.9 (d,  $J = 7.9$  Hz), 135.8 (d,  $J = 7.3$  Hz), 134.5, 129.7, 129.1, 125.2, 123.3, 98.5 (d,  $J = 4.0$  Hz), 54.9 (d,  $J = 6.3$  Hz) (2).  $^{31}\text{P}$  NMR (243 MHz,  $\text{CDCl}_3$ ):  $\delta$  (ppm) -4.1. HRMS (m/z) calcd for  $\text{C}_{10}\text{H}_{13}\text{ClO}_4\text{P}[\text{M}+\text{H}]^+$  263.02400, found 263.02279.

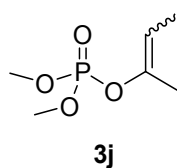

**dimethyl pent-2-en-3-yl phosphate (3j, major).** Colorless oil, yield 70% (**major + minor**);  $^1\text{H}$  NMR(600 MHz,  $\text{CDCl}_3$ ):  $\delta$  (ppm) 5.27-5.23 (m, 1H), 3.75 (d,  $J = 11.3$  Hz, 6H), 1.86 (s, 3H), 1.57-1.54 (m, 3H).  $^{13}\text{C}$  NMR(151 MHz,  $\text{CDCl}_3$ ):  $\delta$  (ppm) 145.1 (d,  $J = 8.9$  Hz), 109.2 (d,  $J = 5.6$  Hz), 54.5 (d,  $J = 6.3$  Hz) (2), 15.6 (d,  $J = 3.5$  Hz), 11.8 (d,  $J = 0.7$  Hz).  $^{31}\text{P}$  NMR (243 MHz,  $\text{CDCl}_3$ ):  $\delta$  (ppm) -3.7. HRMS (m/z) calcd for  $\text{C}_6\text{H}_{14}\text{O}_4\text{P}[\text{M}+\text{H}]^+$  181.06297, found 181.06192.

**dimethyl pent-2-en-3-yl phosphate (3j, minor).** Colorless oil, yield 70% (**major +**

**minor**);  $^1\text{H}$  NMR(600 MHz,  $\text{CDCl}_3$ ):  $\delta$  (ppm) 4.83 (q,  $J = 7.2$  Hz, 1H), 3.78(d,  $J = 11.3$  Hz, 6H), 1.93 (s, 3H), 1.58-1.56 (m, 3H).  $^{13}\text{C}$  NMR(151 MHz,  $\text{CDCl}_3$ ):  $\delta$  (ppm) 144.6 (d,  $J = 8.4$  Hz), 109.5 (d,  $J = 7.9$  Hz), 54.5 (d,  $J = 6.3$  Hz) (2), 20.2, 10.5 (d,  $J = 1.7$  Hz).  $^{31}\text{P}$  NMR (243 MHz,  $\text{CDCl}_3$ ):  $\delta$  (ppm) -3.9. HRMS (m/z) calcd for  $\text{C}_6\text{H}_{14}\text{O}_4\text{P}[\text{M}+\text{H}]^+$  181.06297, found 181.06192.

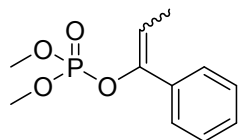

**3k**

**dimethyl (1-phenylprop-1-en-1-yl) phosphate (3k, major)**. Colorless oil, yield 90% (**major + minor**);  $^1\text{H}$  NMR(600 MHz,  $\text{CDCl}_3$ ):  $\delta$  (ppm) 7.49-7.47 (m, 2H), 7.33-7.30 (m, 2H), 7.27-7.25 (m, 1H), 5.65 (qd,  $J = 7.2, 3.0$  Hz, 1H), 3.71 (d,  $J = 11.3$  Hz, 6H), 1.87 (dd,  $J = 7.2, 3.0$ Hz, 3H).  $^{13}\text{C}$  NMR(151 MHz,  $\text{CDCl}_3$ ):  $\delta$  (ppm) 146.6 (d,  $J = 9.1$  Hz), 135.4 (d,  $J = 1.5$  Hz), 128.4, 128.2 (2), 125.1 (2), 112.2 (d,  $J = 6.5$  Hz), 54.6 (d,  $J = 6.3$  Hz) (2), 11.6 (d,  $J = 1.8$  Hz).  $^{31}\text{P}$  NMR (243 MHz,  $\text{CDCl}_3$ ):  $\delta$  (ppm) -3.3. HRMS (m/z) calcd for  $\text{C}_{11}\text{H}_{16}\text{O}_4\text{P}[\text{M}+\text{H}]^+$  243.07862, found 243.07732.

**dimethyl (1-phenylprop-1-en-1-yl) phosphate (3k, minor)**. Colorless oil, yield 90% (**major + minor**);  $^1\text{H}$  NMR(600 MHz,  $\text{CDCl}_3$ ):  $\delta$  (ppm) 7.45-7.43 (m, 2H), 7.37-7.35 (m, 2H), 7.33-7.30 (m, 1H), 5.73 (qd,  $J = 7.2, 3.0$  Hz, 1H), 3.70 (d,  $J = 11.3$  Hz, 6H), 1.74 (dd,  $J = 7.2, 3.0$ Hz, 3H).  $^{13}\text{C}$  NMR(151 MHz,  $\text{CDCl}_3$ ):  $\delta$  (ppm) 146.2 (d,  $J = 9.1$  Hz), 133.8 (d,  $J = 1.5$  Hz), 128.5, 128.1 (2), 128.0 (2), 125.1, 111.8 (d,  $J = 6.5$  Hz), 54.5 (d,  $J = 6.3$  Hz) (2), 12.8 (d,  $J = 1.8$  Hz).  $^{31}\text{P}$  NMR (243 MHz,  $\text{CDCl}_3$ ):  $\delta$  (ppm) -3.4. HRMS (m/z) calcd for  $\text{C}_{11}\text{H}_{16}\text{O}_4\text{P}[\text{M}+\text{H}]^+$  243.07862, found 243.07732.

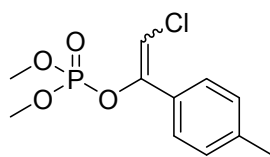

**3l**

**2-chloro-1-(p-tolyl)vinyl dimethyl phosphate (3l, major)**. Colorless oil, yield 95% (**major + minor**);  $^1\text{H}$  NMR(600 MHz,  $\text{CDCl}_3$ ):  $\delta$  (ppm) 7.38 (d,  $J = 8.2$  Hz, 2H), 7.17 (d,  $J = 8.0$  Hz, 2H), 6.14 (d,  $J = 2.2$  Hz, 1H), 3.79 (d,  $J = 11.5$  Hz, 6H), 2.35 (s, 3H).  $^{13}\text{C}$  NMR(151 MHz,  $\text{CDCl}_3$ ):  $\delta$  (ppm) 148.3 (d,  $J = 8.4$  Hz), 139.7, 130.2, 129.3 (2), 125.7 (2), 105.6 (d,  $J = 8.0$  Hz), 55.0 (d,  $J = 6.0$  Hz) (2), 21.3.  $^{31}\text{P}$  NMR (243 MHz,  $\text{CDCl}_3$ ):  $\delta$  (ppm) -3.6. HRMS (m/z) calcd for  $\text{C}_{11}\text{H}_{15}\text{Cl O}_4\text{P}[\text{M}+\text{H}]^+$  277.03965, found 277.03848.

**2-chloro-1-(p-tolyl)vinyl dimethyl phosphate (3l, minor)**. Colorless oil, yield 95%

(**major + minor**);  $^1\text{H}$  NMR(600 MHz,  $\text{CDCl}_3$ ):  $\delta$  (ppm) 7.60 (d,  $J = 8.2$  Hz, 2H), 7.21 (d,  $J = 8.0$  Hz, 2H), 6.43 (d,  $J = 2.2$  Hz, 1H), 3.75 (d,  $J = 11.5$  Hz, 6H), 2.37 (s, 3H).  $^{13}\text{C}$  NMR(151 MHz,  $\text{CDCl}_3$ ):  $\delta$  (ppm) 147.4 (d,  $J = 8.4$  Hz), 139.8, 130.2, 128.8 (2), 128.2 (2), 107.9 (d,  $J = 8.0$  Hz), 54.9 (d,  $J = 6.0$  Hz) (2), 21.4.  $^{31}\text{P}$  NMR (243 MHz,  $\text{CDCl}_3$ ):  $\delta$  (ppm) -3.5. HRMS ( $m/z$ ) calcd for  $\text{C}_{11}\text{H}_{15}\text{Cl O}_4\text{P}[\text{M}+\text{H}]^+$  277.03965, found 277.03848.

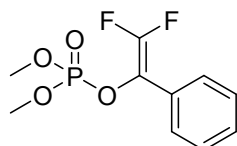

**3m**

**2,2-difluoro-1-phenylvinyl dimethyl phosphate (3m)**. Colorless oil, yield 90%;  $^1\text{H}$  NMR(600 MHz,  $\text{CDCl}_3$ ):  $\delta$  (ppm) 7.51 (d,  $J = 8.3$  Hz, 2H), 7.41 (t,  $J = 7.7$  Hz, 2H), 7.34 (t,  $J = 7.4$  Hz, 1H), 3.77 (d,  $J = 11.4$  Hz, 6H).  $^{13}\text{C}$  NMR(151 MHz,  $\text{CDCl}_3$ ):  $\delta$  (ppm) 154.8 (ddd,  $J = 291.8, 287.9, 7.6$  Hz), 134.2 (d,  $J = 243.3$  Hz), 130.1, 128.9 (2), 128.6 (2), 126.3 (dd,  $J = 5.6, 3.5$  Hz), 55.0 (d,  $J = 6.0$  Hz) (2).  $^{31}\text{P}$  NMR(243 MHz,  $\text{CDCl}_3$ ):  $\delta$  (ppm) -1.59 (dd,  $J = 10.0, 6.9$  Hz). HRMS ( $m/z$ ) calcd for  $\text{C}_{10}\text{H}_{12}\text{O}_4\text{F}_2\text{P}[\text{M}+\text{H}]^+$  265.04413, found 265.04277.

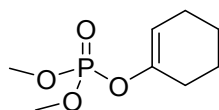

**3n**

**cyclohex-1-en-1-yl dimethyl phosphate (3n)**. Colorless oil, yield 85%;  $^1\text{H}$  NMR(600 MHz,  $\text{CDCl}_3$ ):  $\delta$  (ppm) 5.49-5.38 (m, 1H), 3.77 (d,  $J = 11.3$  Hz, 6H), 2.24-2.11 (m, 2H), 2.11-1.99 (m, 2H), 1.69 (dtd,  $J = 9.1, 6.2, 3.1$  Hz, 2H), 1.52 (dtd,  $J = 9.2, 6.1, 3.0$  Hz, 2H).  $^{13}\text{C}$  NMR(151 MHz,  $\text{CDCl}_3$ ):  $\delta$  (ppm) 147.5 (d,  $J = 9.0$  Hz), 110.7 (d,  $J = 5.5$  Hz), 54.5 (d,  $J = 6.4$  Hz) (2), 27.5 (d,  $J = 4.2$  Hz), 23.5 (d,  $J = 1.0$  Hz), 22.6, 21.4.  $^{31}\text{P}$  NMR(243 MHz,  $\text{CDCl}_3$ ):  $\delta$  (ppm) -4.0. HRMS ( $m/z$ ) calcd for  $\text{C}_8\text{H}_{16}\text{O}_5\text{P}[\text{M}+\text{H}]^+$  207.07862, found 207.07862.

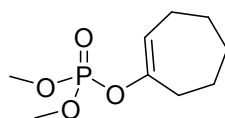

**3o**

**cyclohept-1-en-1-yl dimethyl phosphate (3o)**. Colorless oil, yield 81%;  $^1\text{H}$  NMR(600 MHz,  $\text{CDCl}_3$ ):  $\delta$  (ppm) 5.60 (td,  $J = 6.5, 2.5$  Hz, 1H), 3.77 (d,  $J = 11.3$  Hz, 6H), 2.45-2.34 (m, 2H), 2.04 (dt,  $J = 6.2, 5.3$  Hz, 2H), 1.67 (dt,  $J = 11.3, 5.2$  Hz, 2H), 1.61 (dt,  $J$

= 8.3, 5.7 Hz, 2H), 1.55 (dt,  $J = 8.0, 5.9$  Hz, 2H).  $^{13}\text{C}$  NMR(151 MHz,  $\text{CDCl}_3$ ):  $\delta$  (ppm) 13C NMR (151 MHz,  $\text{CDCl}_3$ )  $\delta$  152.0 (d,  $J = 9.5$  Hz), 115.4 (d,  $J = 5.4$  Hz), 54.5 (d,  $J = 6.3$  Hz) (2), 33.2 (d,  $J = 3.7$  Hz), 30.5, 26.8 (d,  $J = 0.8$  Hz), 25.0, 24.7 (d,  $J = 0.8$  Hz).  $^{31}\text{P}$  NMR(243 MHz,  $\text{CDCl}_3$ ):  $\delta$  (ppm) -3.8. HRMS (m/z) calcd for  $\text{C}_9\text{H}_{18}\text{O}_5\text{P}[\text{M}+\text{H}]^+$  221.09427, found 221.09304.

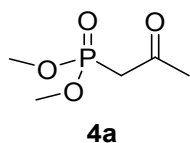

**dimethyl (2-oxopropyl)phosphonate (4a).** Colorless oil, yield 85%;  $^1\text{H}$  NMR(600 MHz,  $\text{CDCl}_3$ ):  $\delta$  (ppm) 3.76 (d,  $J = 11.2$  Hz, 6H), 3.08 (d,  $J = 22.8$  Hz, 2H), 2.30 (s, 3H).  $^{13}\text{C}$  NMR(151 MHz,  $\text{CDCl}_3$ ):  $\delta$  (ppm) 199.7 (d,  $J = 6.2$  Hz), 53.0 (d,  $J = 6.5$  Hz) (2), 42.1 (d,  $J = 127.8$  Hz), 31.4.  $^{31}\text{P}$  NMR(243 MHz,  $\text{CDCl}_3$ ):  $\delta$  (ppm) 22.4. HRMS (m/z) calcd for  $\text{C}_5\text{H}_{12}\text{O}_4\text{P}[\text{M}+\text{H}]^+$  167.04732, found 167.04636.

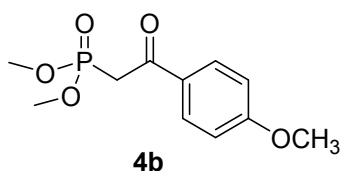

**dimethyl (2-(4-methoxyphenyl)-2-oxoethyl)phosphonate (4b).** Colorless oil, yield 90%;  $^1\text{H}$  NMR(600 MHz,  $\text{CDCl}_3$ ):  $\delta$  (ppm) 7.94 (dd,  $J = 8.8, 1.0$  Hz, 2H), 7.00-6.82 (m, 2H), 3.83 (d,  $J = 1.2$  Hz, 3H), 3.73 (d,  $J = 11.3$  Hz, 6H), 3.57 (s, 1H), 3.53 (s, 1H).  $^{13}\text{C}$  NMR(151 MHz,  $\text{CDCl}_3$ ):  $\delta$  (ppm) 190.0 (d,  $J = 6.4$  Hz), 164.0, 131.3 (2), 129.3 (d,  $J = 2.2$  Hz), 113.8 (2), 55.4, 53.0 (d,  $J = 6.5$  Hz) (2), 37.1 (d,  $J = 131.0$  Hz).  $^{31}\text{P}$  NMR(243 MHz,  $\text{CDCl}_3$ ):  $\delta$  (ppm) 23.3. HRMS (m/z) calcd for  $\text{C}_{11}\text{H}_{16}\text{O}_5\text{P}[\text{M}+\text{H}]^+$  259.07354, found 259.07238.

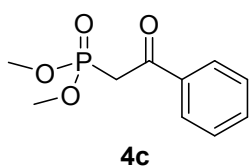

**dimethyl (2-oxo-2-phenylethyl)phosphonate (4c).** Colorless oil, yield 85%;  $^1\text{H}$  NMR(600 MHz,  $\text{CDCl}_3$ ):  $\delta$  (ppm) 8.00-7.97 (m, 2H), 7.60-7.56 (m, 1H), 7.49-7.45 (m, 2H), 3.77 (d,  $J = 11.3$  Hz, 6H), 3.65 (s, 1H), 3.61 (s, 1H).  $^{13}\text{C}$  NMR(151 MHz,  $\text{CDCl}_3$ ):  $\delta$  (ppm) 191.7 (d,  $J = 6.6$  Hz), 136.3 (d,  $J = 2.5$  Hz), 133.8, 128.9 (2), 128.7 (2), 53.1 (d,  $J = 6.5$  Hz) (2), 37.4 (d,  $J = 131.5$  Hz).  $^{31}\text{P}$  NMR(243 MHz,  $\text{CDCl}_3$ ):  $\delta$  (ppm) 22.8. HRMS (m/z) calcd for  $\text{C}_{10}\text{H}_{14}\text{O}_4\text{P}[\text{M}+\text{H}]^+$  229.06297, found 229.06176.

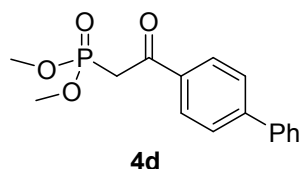

**1-([1,1'-biphenyl]-4-yl)vinyl dimethyl phosphate (4d).** Colorless oil, yield 83%;  $^1\text{H}$  NMR(600 MHz,  $\text{CDCl}_3$ ):  $\delta$  (ppm) 8.01 (d,  $J = 8.5$  Hz, 2H), 7.64 (d,  $J = 8.4$  Hz, 2H), 7.56 (dd,  $J = 8.2, 1.1$  Hz, 2H), 7.40 (t,  $J = 7.6$  Hz, 2H), 7.34 (d,  $J = 7.4$  Hz, 1H), 3.73 (d,  $J = 11.3$  Hz, 6H), 3.62 (s, 1H), 3.59 (s, 1H).  $^{13}\text{C}$  NMR(151 MHz,  $\text{CDCl}_3$ ):  $\delta$  (ppm) 191.2 (d,  $J = 6.6$  Hz), 146.5, 139.6, 135.0, 129.6 (2), 129.0 (2), 128.4, 127.3 (2), 127.2 (2), 53.2 (d,  $J = 6.5$  Hz) (2), 37.5 (d,  $J = 131.0$  Hz).  $^{31}\text{P}$  NMR(243 MHz,  $\text{CDCl}_3$ ):  $\delta$  (ppm) 22.9. HRMS (m/z) calcd for  $\text{C}_{16}\text{H}_{18}\text{O}_4\text{P}[\text{M}+\text{H}]^+$  305.09427, found 305.09279.

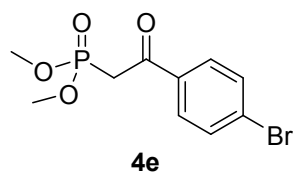

**dimethyl (2-(4-bromophenyl)-2-oxoethyl)phosphonate (4e).** Colorless oil, yield 85%;  $^1\text{H}$  NMR(600 MHz,  $\text{CDCl}_3$ ):  $\delta$  (ppm) 8.11-7.76 (m, 2H), 7.70-7.53 (m, 2H), 3.74 (d,  $J = 11.3$  Hz, 6H), 3.59 (s, 1H), 3.55 (s, 1H).  $^{13}\text{C}$  NMR(151 MHz,  $\text{CDCl}_3$ ):  $\delta$  (ppm) 190.7 (d,  $J = 6.6$  Hz), 134.9 (d,  $J = 2.2$  Hz), 131.9 (2), 130.4 (2), 129.1, 53.1 (d,  $J = 6.6$  Hz) (2), 37.5 (d,  $J = 130.7$  Hz).  $^{31}\text{P}$  NMR(243 MHz,  $\text{CDCl}_3$ ):  $\delta$  (ppm) 22.2. HRMS (m/z) calcd for  $\text{C}_{10}\text{H}_{13}\text{BrO}_4\text{P}[\text{M}+\text{H}]^+$  306.97348, found 306.97215.

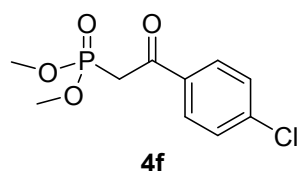

**dimethyl (2-(4-chlorophenyl)-2-oxoethyl)phosphonate (4f).** Colorless oil, yield 85%;  $^1\text{H}$  NMR(600 MHz,  $\text{CDCl}_3$ ):  $\delta$  (ppm) 8.03-7.74 (m, 2H), 7.64-7.31 (m, 2H), 3.72 (d,  $J = 11.3$  Hz, 6H), 3.56 (s, 1H), 3.52 (s, 1H).  $^{13}\text{C}$  NMR(151 MHz,  $\text{CDCl}_3$ ):  $\delta$  (ppm) 190.5 (d,  $J = 6.6$  Hz), 140.4, 134.6 (d,  $J = 2.2$  Hz), 130.4 (2), 129.0 (2), 53.21 (d,  $J = 6.5$  Hz) (2), 37.6 (d,  $J = 130.8$  Hz).  $^{31}\text{P}$  NMR(243 MHz,  $\text{CDCl}_3$ ):  $\delta$  (ppm) 22.3. HRMS (m/z) calcd for  $\text{C}_{10}\text{H}_{13}\text{ClO}_4\text{P}[\text{M}+\text{H}]^+$  263.02400, found 263.02286.

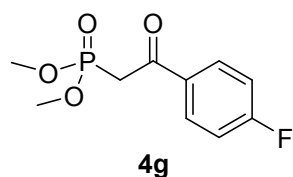



**dimethyl (2-(4-fluorophenyl)-2-oxoethyl)phosphonate (4g)**. Colorless oil, yield 93%;  $^1\text{H}$  NMR (600 MHz,  $\text{CDCl}_3$ ):  $\delta$  (ppm) 8.01 (dd,  $J = 8.8, 5.3$  Hz, 2H), 7.11 (t,  $J = 8.6$  Hz, 2H), 3.74 (d,  $J = 11.3$  Hz, 6H), 3.60 (s, 1H), 3.56 (s, 1H).  $^{13}\text{C}$  NMR (151 MHz,  $\text{CDCl}_3$ ):  $\delta$  (ppm) 190.1 (d,  $J = 6.5$  Hz), 166.0 (d,  $J = 256.3$  Hz), 132.7 (t,  $J = 2.5$  Hz), 131.7 (d,  $J = 9.6$  Hz) (2), 115.8 (d,  $J = 22.0$  Hz) (2), 53.1 (d,  $J = 6.6$  Hz) (2), 37.46 (d,  $J = 130.8$  Hz).  $^{31}\text{P}$  NMR (243 MHz,  $\text{CDCl}_3$ ):  $\delta$  (ppm) 22.5. HRMS ( $m/z$ ) calcd for  $\text{C}_{10}\text{H}_{13}\text{FO}_4\text{P}[\text{M}+\text{H}]^+$  247.05355, found 247.05225.

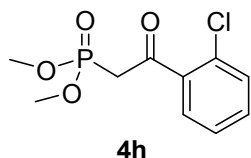

**dimethyl (2-(2-chlorophenyl)-2-oxoethyl)phosphonate (4h)**. Colorless oil, yield 67%;  $^1\text{H}$  NMR (600 MHz,  $\text{CDCl}_3$ ):  $\delta$  (ppm) 7.59 (dd,  $J = 4.6, 3.7$  Hz, 1H), 7.42 (dd,  $J = 4.9, 1.3$  Hz, 2H), 7.38-7.32 (m, 1H), 3.76 (d,  $J = 11.3$  Hz, 6H), 3.74 (s, 1H), 3.70 (s, 1H).  $^{13}\text{C}$  NMR (151 MHz,  $\text{CDCl}_3$ ):  $\delta$  (ppm) 194.2 (d,  $J = 7.0$  Hz), 138.4 (d,  $J = 2.3$  Hz), 132.4, 131.1, 130.6, 129.9, 127.0, 53.1 (d,  $J = 6.5$  Hz), 41.1 (d,  $J = 130.2$  Hz).  $^{31}\text{P}$  NMR (243 MHz,  $\text{CDCl}_3$ ):  $\delta$  (ppm) 22.0. HRMS ( $m/z$ ) calcd for  $\text{C}_{10}\text{H}_{13}\text{ClO}_4\text{P}[\text{M}+\text{H}]^+$  263.02400, found 263.02278.

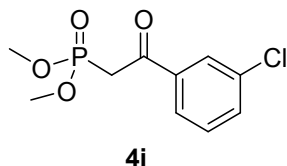

**dimethyl (2-(3-chlorophenyl)-2-oxoethyl)phosphonate (4i)**. Colorless oil, yield 70%;  $^1\text{H}$  NMR (600 MHz,  $\text{CDCl}_3$ ):  $\delta$  (ppm) 7.94 (t,  $J = 1.9$  Hz, 1H), 7.88-7.82 (m, 1H), 7.53 (ddd,  $J = 8.0, 2.1, 0.9$  Hz, 1H), 7.41 (t,  $J = 7.9$  Hz, 1H), 3.76 (d,  $J = 11.3$  Hz, 6H), 3.61 (s, 1H), 3.57 (s, 1H).  $^{13}\text{C}$  NMR (151 MHz,  $\text{CDCl}_3$ ):  $\delta$  (ppm) 13C NMR (151 MHz,  $\text{CDCl}_3$ )  $\delta$  190.5 (d,  $J = 6.7$  Hz), 137.7 (d,  $J = 2.3$  Hz), 135.0, 133.6, 130.0, 128.8, 127.1, 53.2 (d,  $J = 6.6$  Hz) (2), 37.53 (d,  $J = 131.2$  Hz).  $^{31}\text{P}$  NMR (243 MHz,  $\text{CDCl}_3$ ):  $\delta$  (ppm) 22.1. HRMS ( $m/z$ ) calcd for  $\text{C}_{10}\text{H}_{13}\text{ClO}_4\text{P}[\text{M}+\text{H}]^+$  263.02400, found 263.02268.

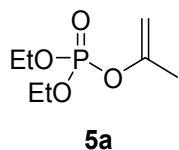

**diethyl prop-1-en-2-yl phosphate (5a)**. Colorless oil, yield 77%;  $^1\text{H}$  NMR (600 MHz,  $\text{CDCl}_3$ ):  $\delta$  (ppm) 4.72 (t,  $J = 1.8$  Hz, 1H), 4.45 (d,  $J = 0.7$  Hz, 1H), 4.21-4.06 (m, 4H),

1.90 (s, 3H), 1.31 (td,  $J = 7.1, 0.7$  Hz, 6H).  $^{13}\text{C}$  NMR (151 MHz,  $\text{CDCl}_3$ ):  $\delta$  (ppm) 152.0 (d,  $J = 8.5$  Hz), 97.9 (d,  $J = 4.9$  Hz), 64.1 (d,  $J = 6.1$  Hz) (2), 20.6 (d,  $J = 5.1$  Hz), 15.9 (d,  $J = 6.8$  Hz) (2).  $^{31}\text{P}$  NMR (243 MHz,  $\text{CDCl}_3$ ):  $\delta$  (ppm) -6.8. HRMS ( $m/z$ ) calcd for  $\text{C}_7\text{H}_{16}\text{O}_4\text{P}[\text{M}+\text{H}]^+$  195.07862, found 195.07755.

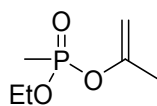

**5b**

**ethyl prop-1-en-2-yl methylphosphonate (5b).** Colorless oil, yield 85%;  $^1\text{H}$  NMR (600 MHz,  $\text{CDCl}_3$ ):  $\delta$  (ppm) 4.68 (t,  $J = 1.9$  Hz, 1H), 4.46-4.41 (m, 1H), 4.20-4.00 (m, 2H), 1.88 (s, 3H), 1.51 (d,  $J = 17.6$  Hz, 3H), 1.29 (t,  $J = 7.1$  Hz, 3H).  $^{13}\text{C}$  NMR (151 MHz,  $\text{CDCl}_3$ ):  $\delta$  (ppm) 152.0 (d,  $J = 9.2$  Hz), 98.0 (d,  $J = 5.0$  Hz), 61.91 (d,  $J = 6.5$  Hz), 21.14 (d,  $J = 3.9$  Hz), 16.17 (d,  $J = 6.3$  Hz), 11.1 (d,  $J = 145.0$  Hz), 10.6.  $^{31}\text{P}$  NMR (243 MHz,  $\text{CDCl}_3$ ):  $\delta$  (ppm) 26.4. HRMS ( $m/z$ ) calcd for  $\text{C}_6\text{H}_{14}\text{O}_3\text{P}[\text{M}+\text{H}]^+$  165.06806, found 165.06712.

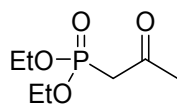

**6a**

**diethyl (2-oxopropyl)phosphonate (6a).** Colorless oil, yield 86%;  $^1\text{H}$  NMR (600 MHz,  $\text{CDCl}_3$ ):  $\delta$  (ppm) 4.31-4.01 (m, 4H), 3.04 (d,  $J = 22.9$  Hz, 2H), 2.27 (s, 3H), 1.29 (t,  $J = 7.1$  Hz, 6H).  $^{13}\text{C}$  NMR (151 MHz,  $\text{CDCl}_3$ ):  $\delta$  (ppm) 199.8 (d,  $J = 6.1$  Hz), 62.5 (d,  $J = 6.5$  Hz) (2), 31.3, 16.17 (d,  $J = 6.3$  Hz) (2).  $^{31}\text{P}$  NMR (243 MHz,  $\text{CDCl}_3$ ):  $\delta$  (ppm) 19.7. HRMS ( $m/z$ ) calcd for  $\text{C}_7\text{H}_{16}\text{O}_4\text{P}[\text{M}+\text{H}]^+$  195.07862, found 195.07751.

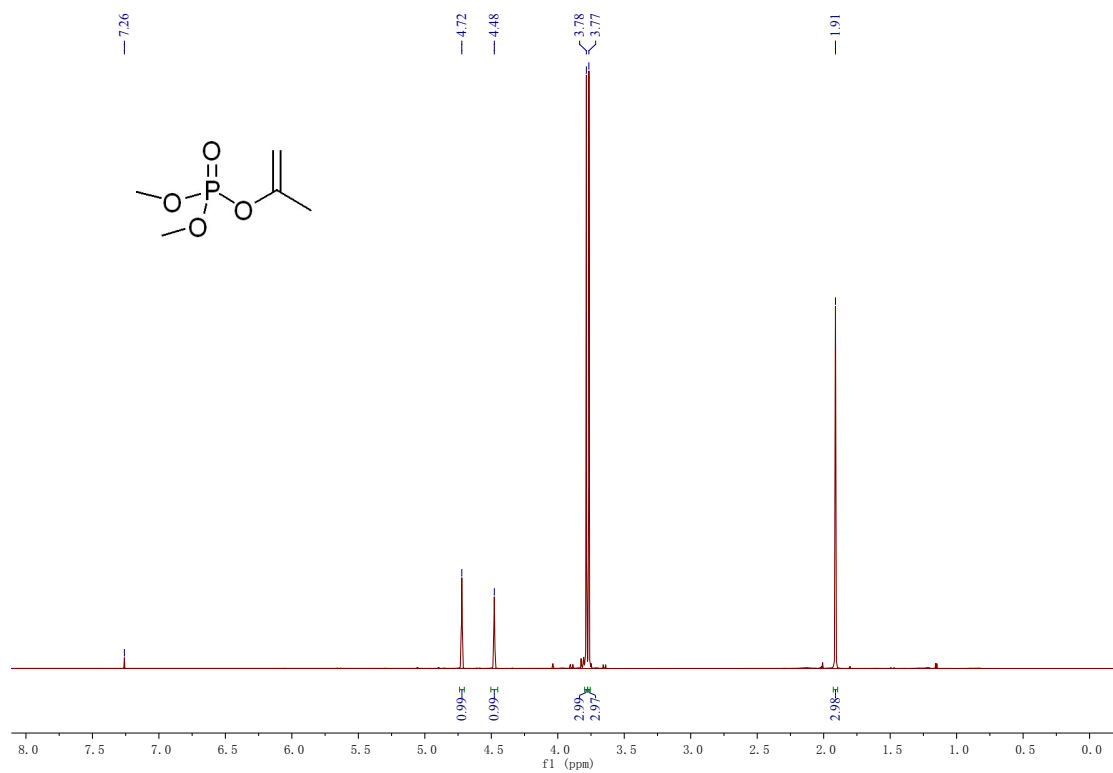

Fig.S 1 <sup>1</sup>H NMR of compound 3a

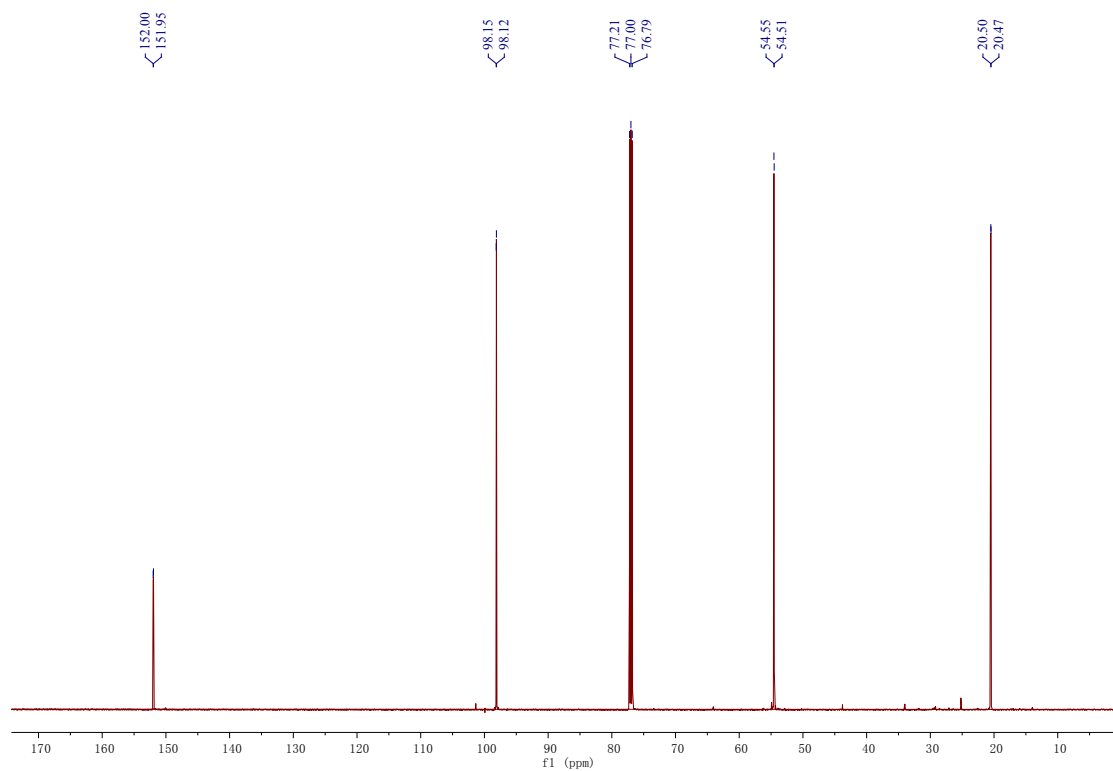

Fig.S 2 <sup>13</sup>C NMR of compound 3a

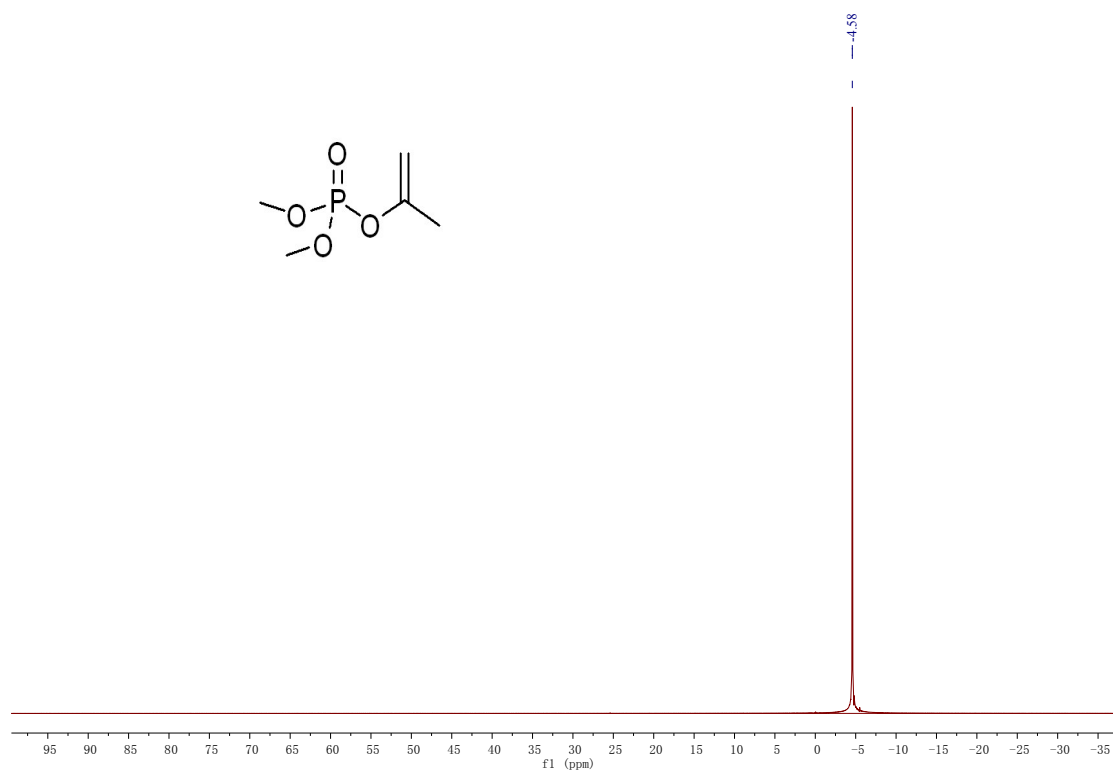

Fig.S 3  $^{31}\text{P}$  NMR of compound **3a**

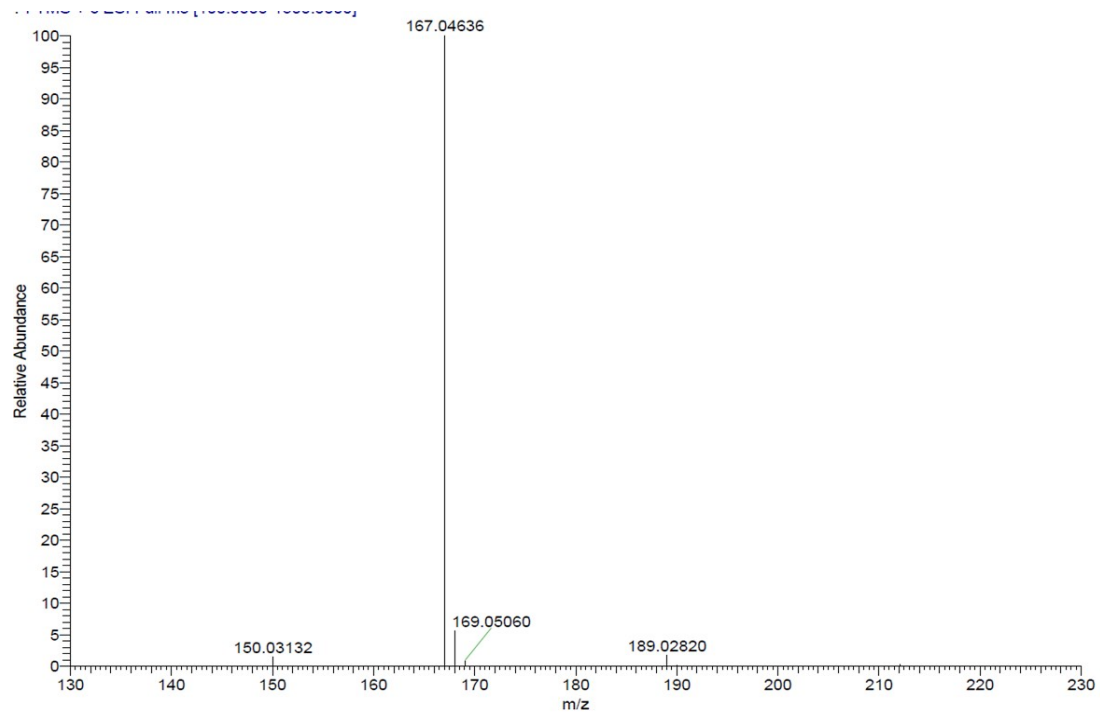

Fig.S 4 HRMS of compound **3a**

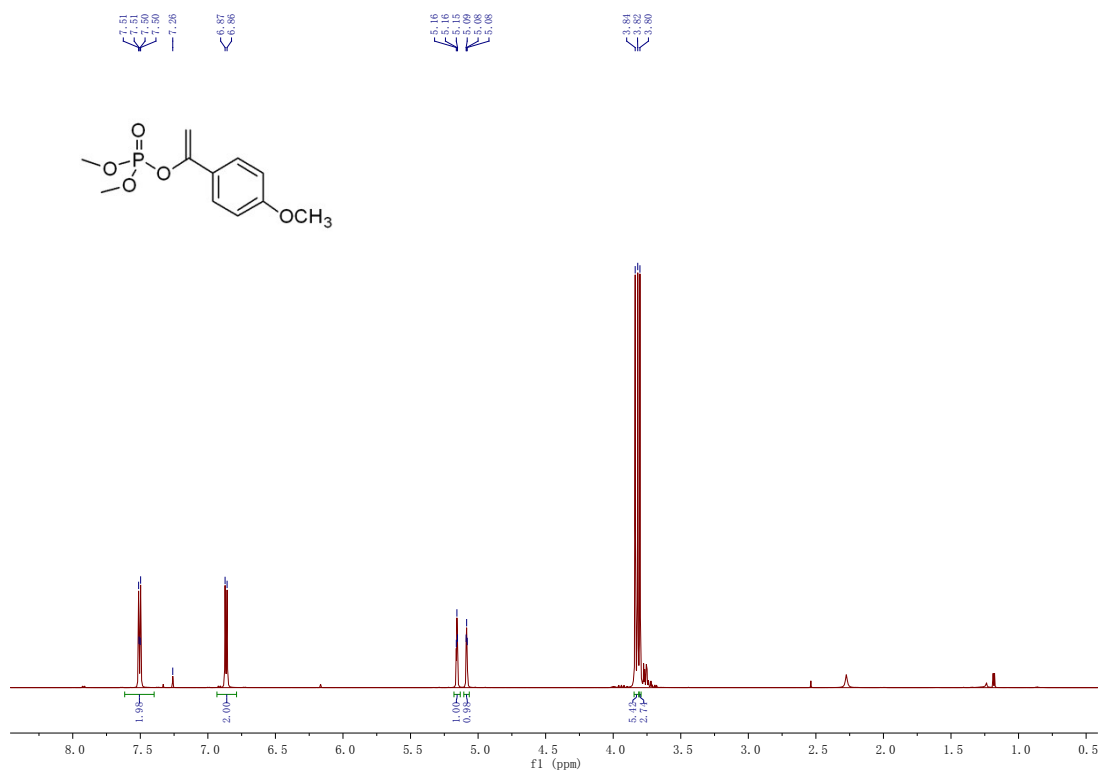

Fig.S 5 <sup>1</sup>H NMR of compound **3b**

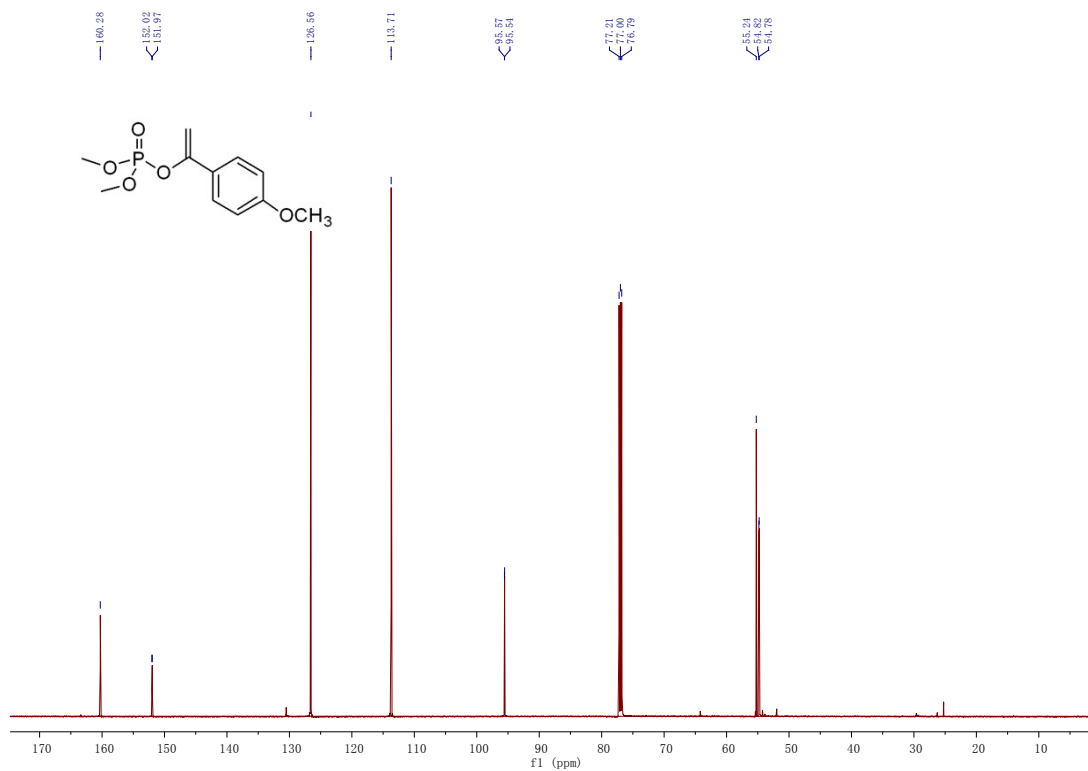

Fig.S 6 <sup>13</sup>C NMR of compound **3b**

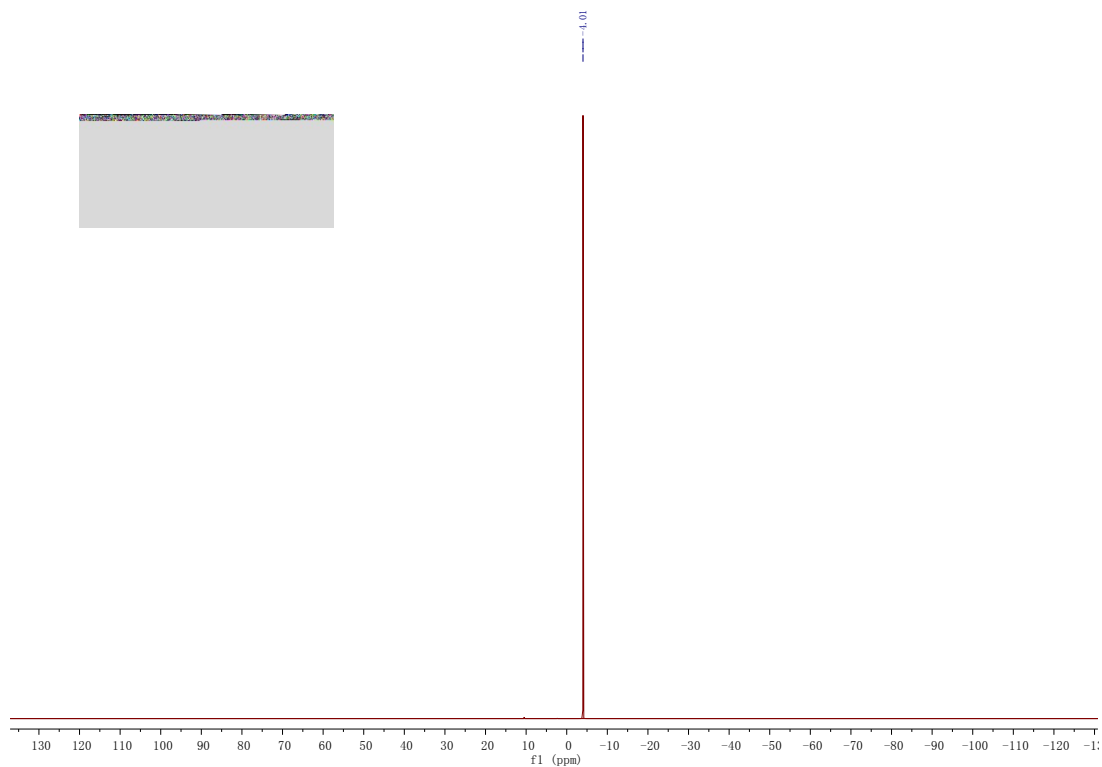

Fig.S 7  $^{31}\text{P}$  NMR of compound **3b**

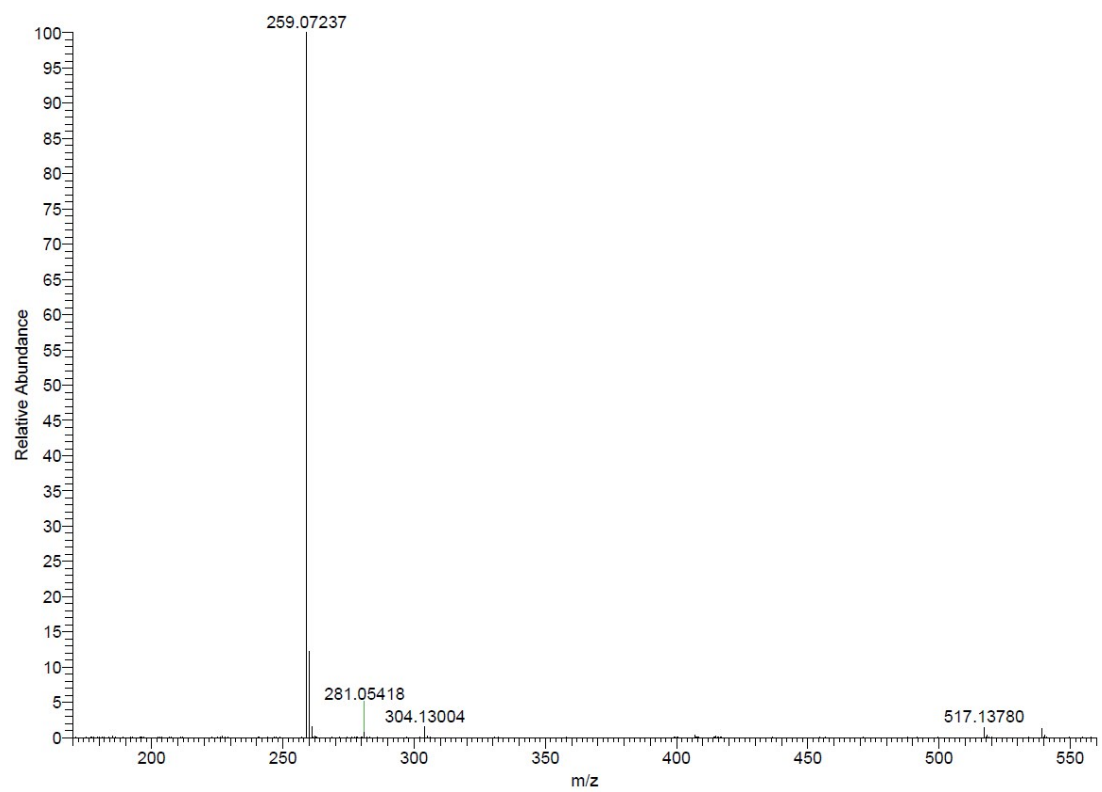

Fig.S 8 HRMS of compound **3b**

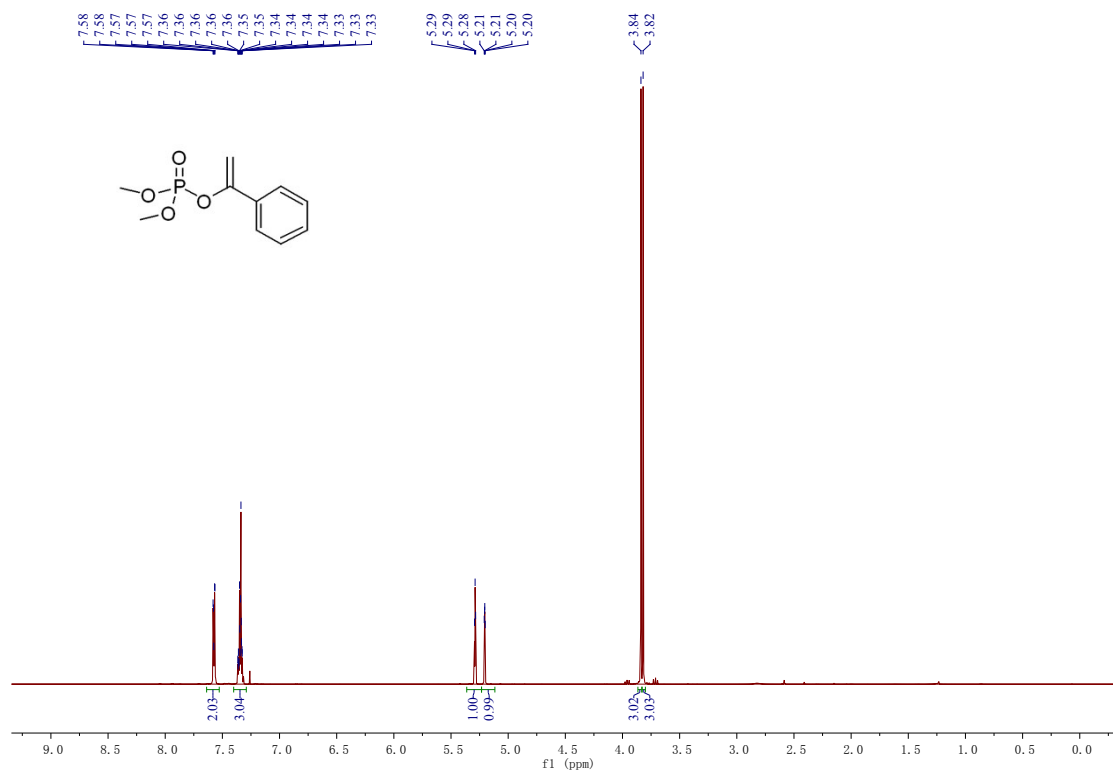

Fig.S 9 <sup>1</sup>H NMR of compound 3c

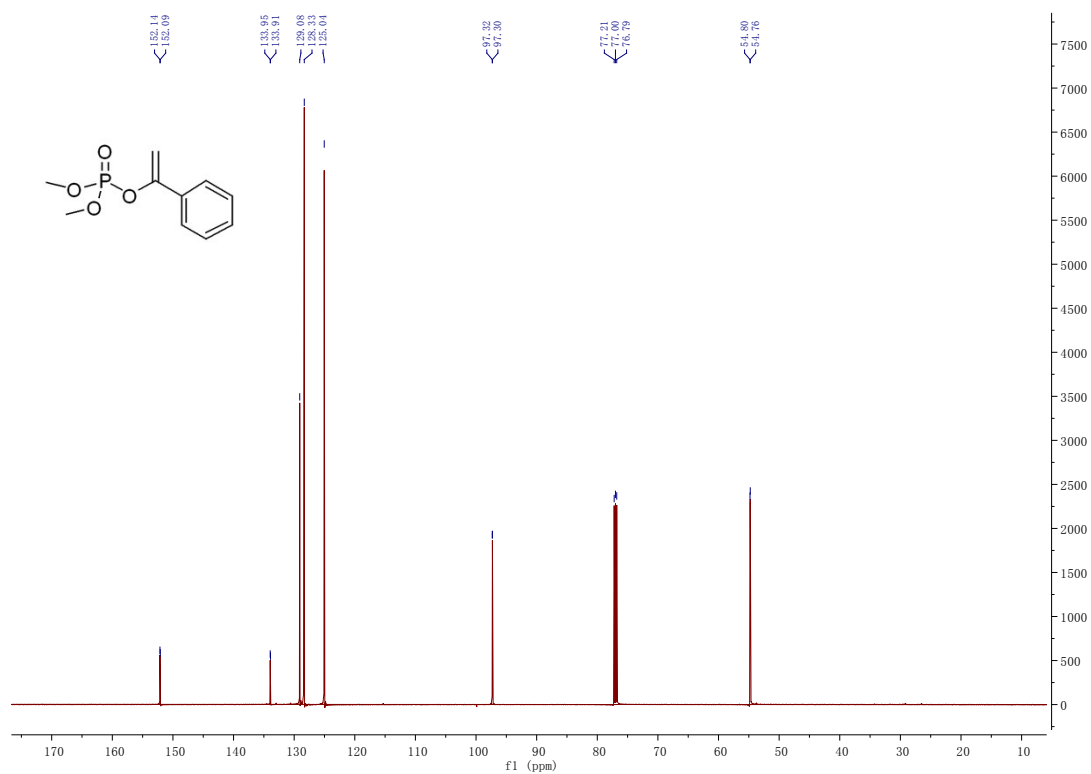

Fig.S 10 <sup>13</sup>C NMR of compound 3c

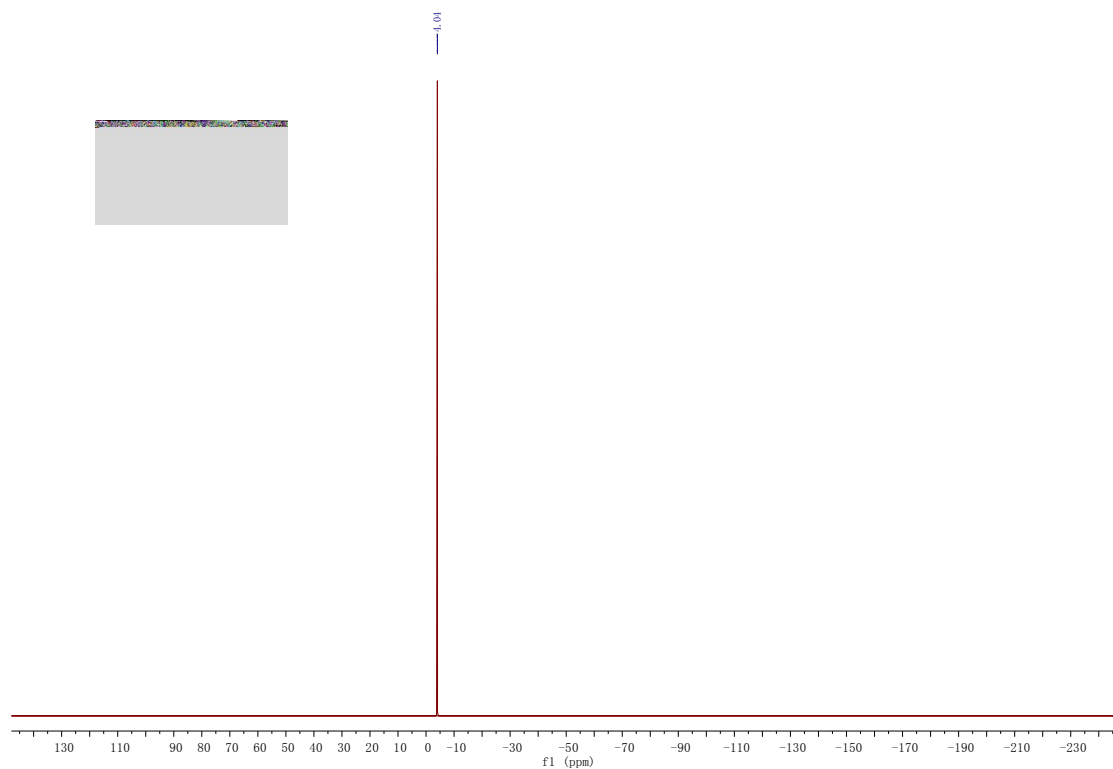

Fig.S 11  $^{31}\text{P}$  NMR of compound **3c**

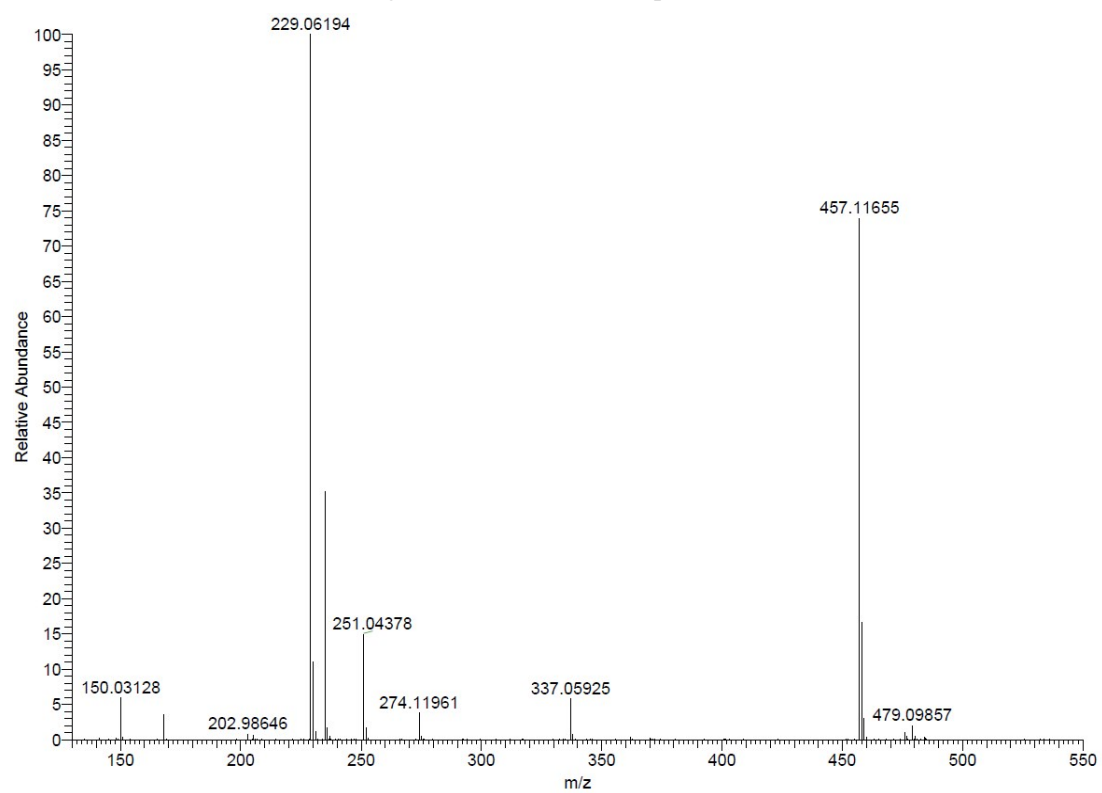

Fig.S 12 HRMS of compound **3c**



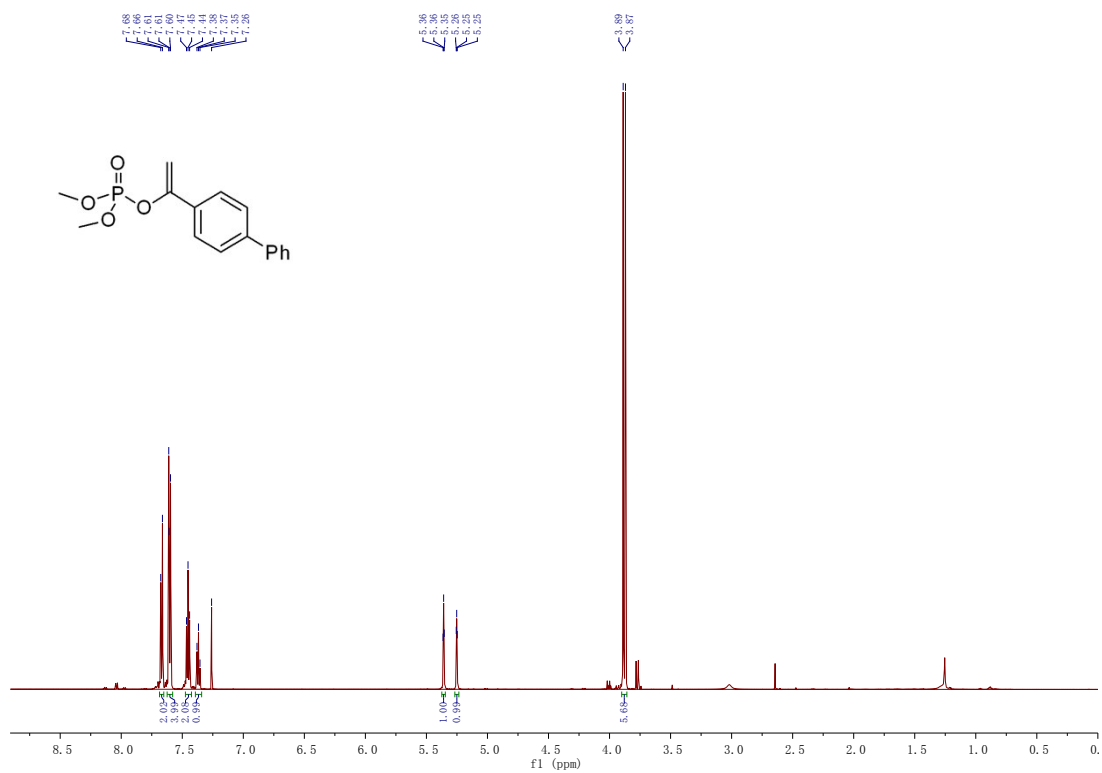

Fig.S 13 <sup>1</sup>H NMR of compound 3d

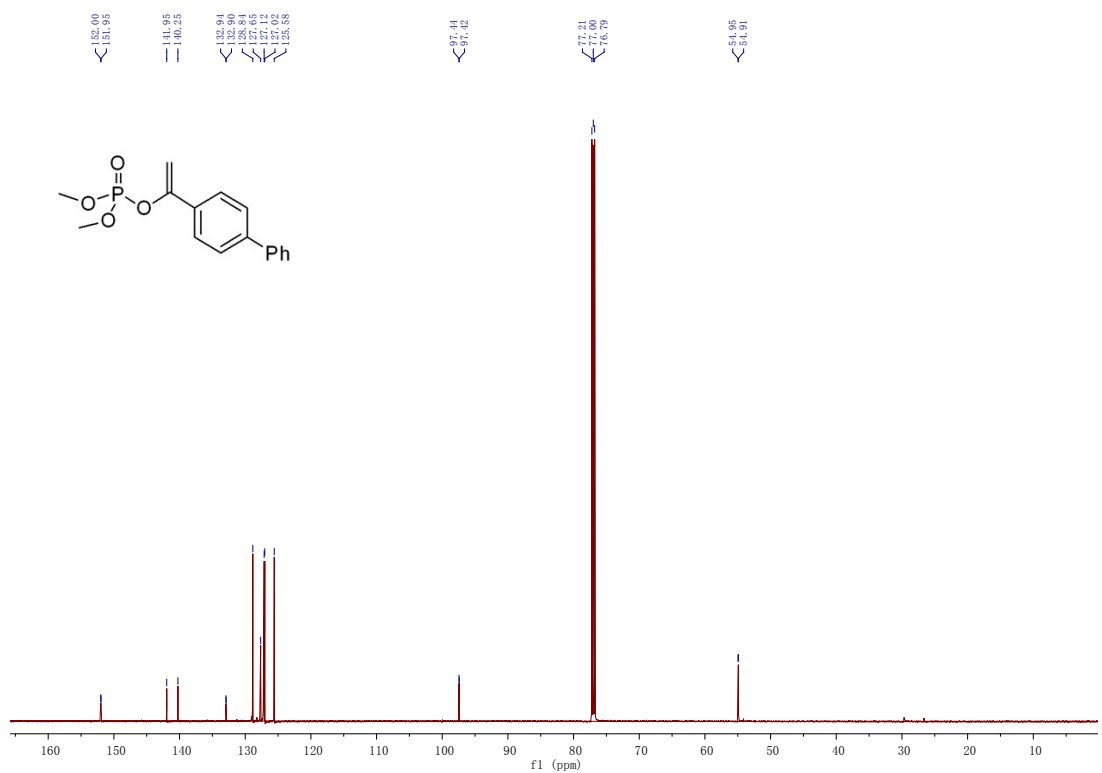

Fig.S 14 <sup>13</sup>C NMR of compound 3d

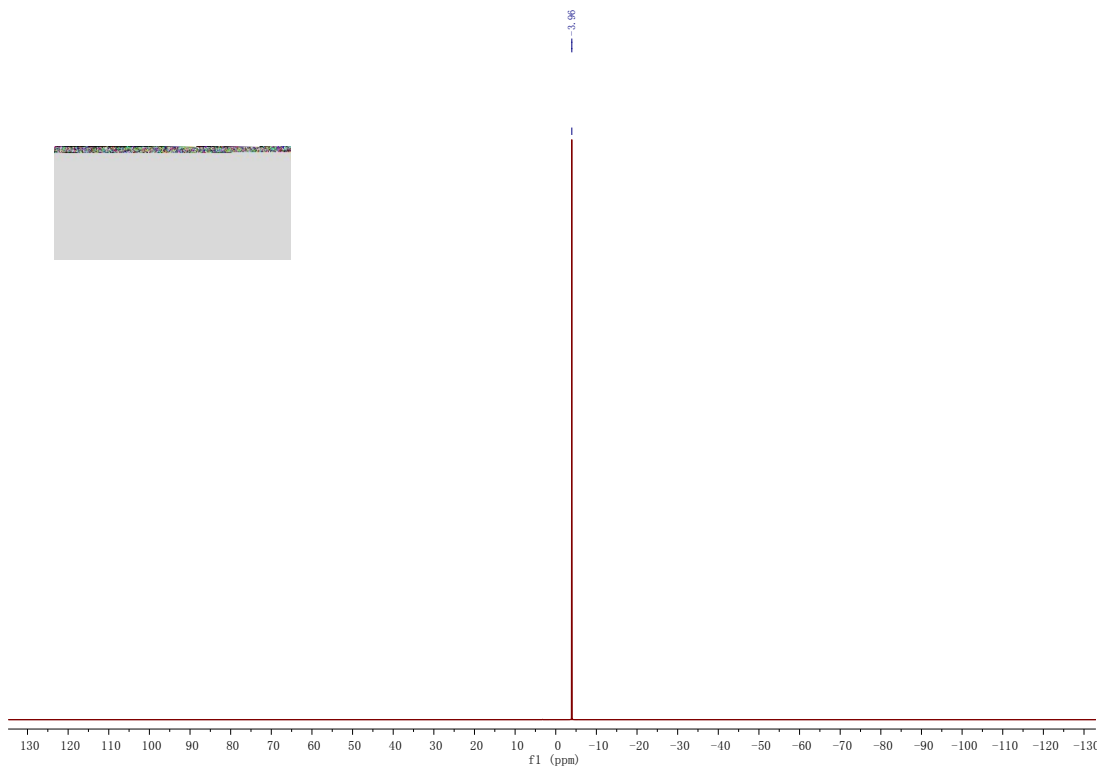

Fig.S 15  $^{31}\text{P}$  NMR of compound **3d**

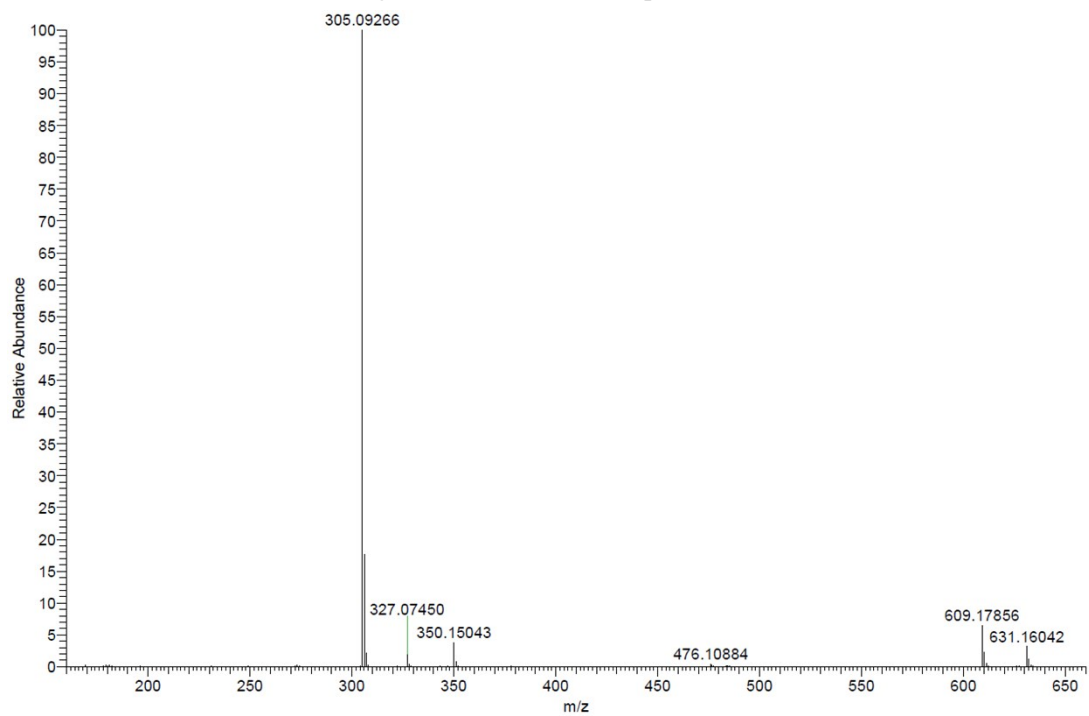

Fig.S 16 HRMS of compound **3d**

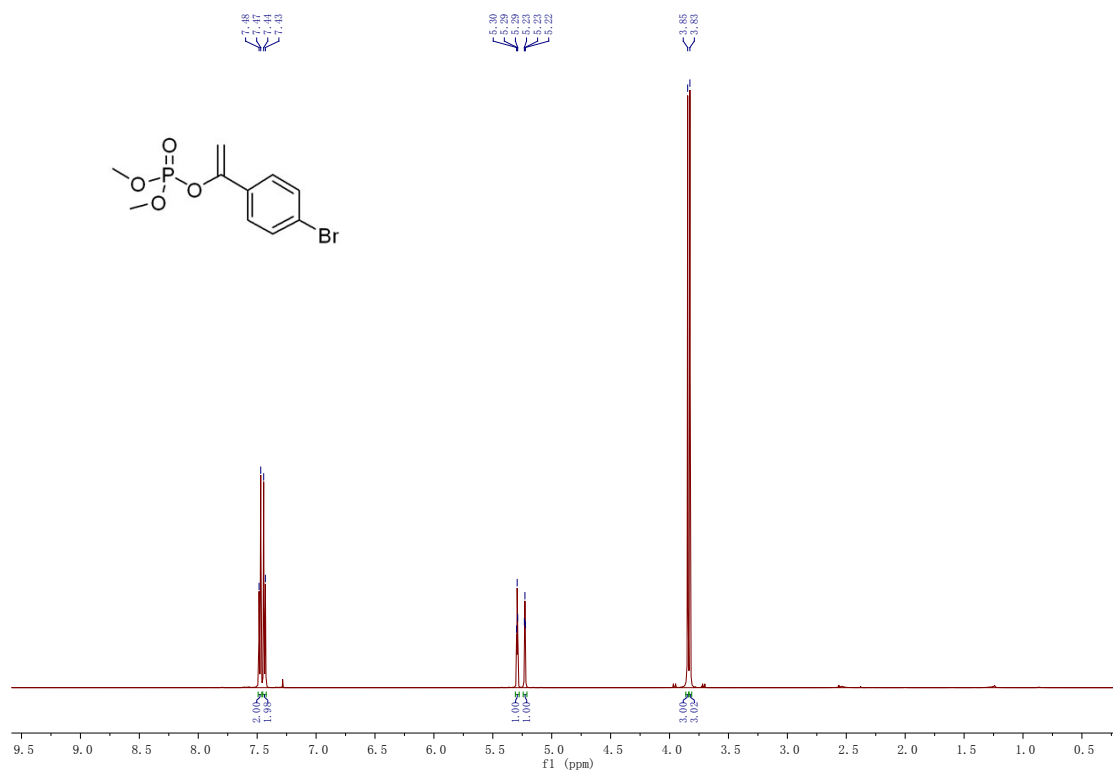

Fig.S 17 <sup>1</sup>H NMR of compound 3e

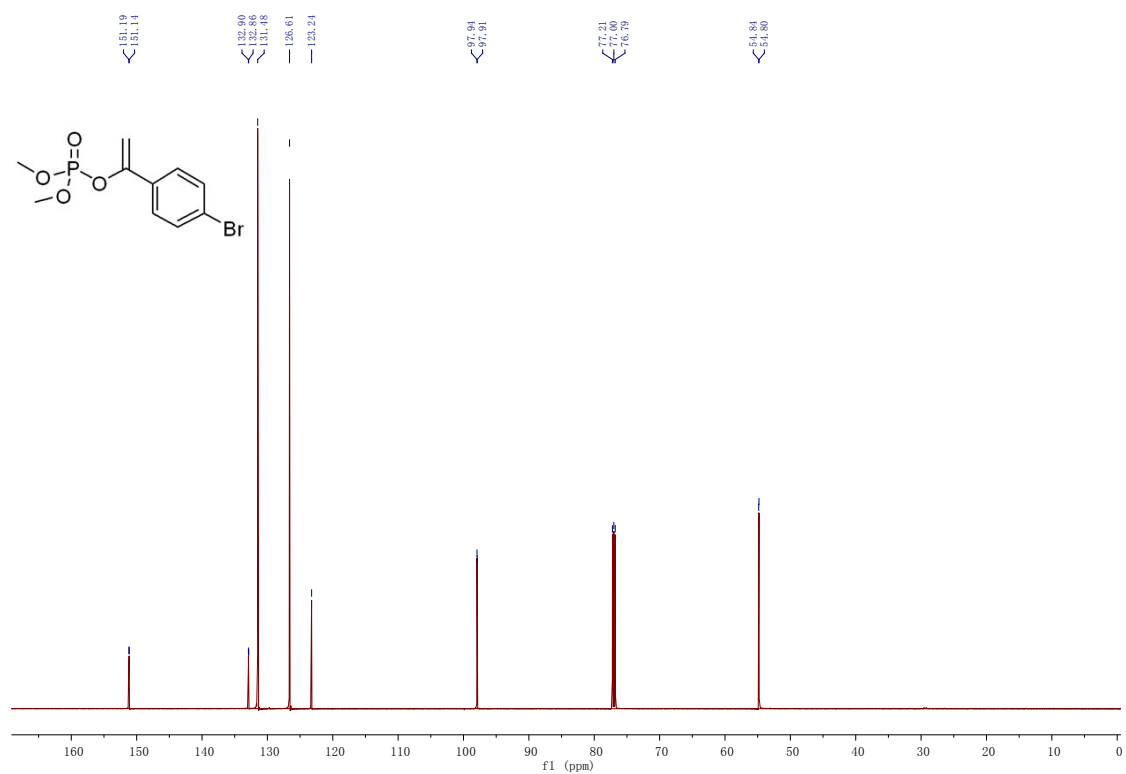

Fig.S 18 <sup>13</sup>C NMR of compound 3e

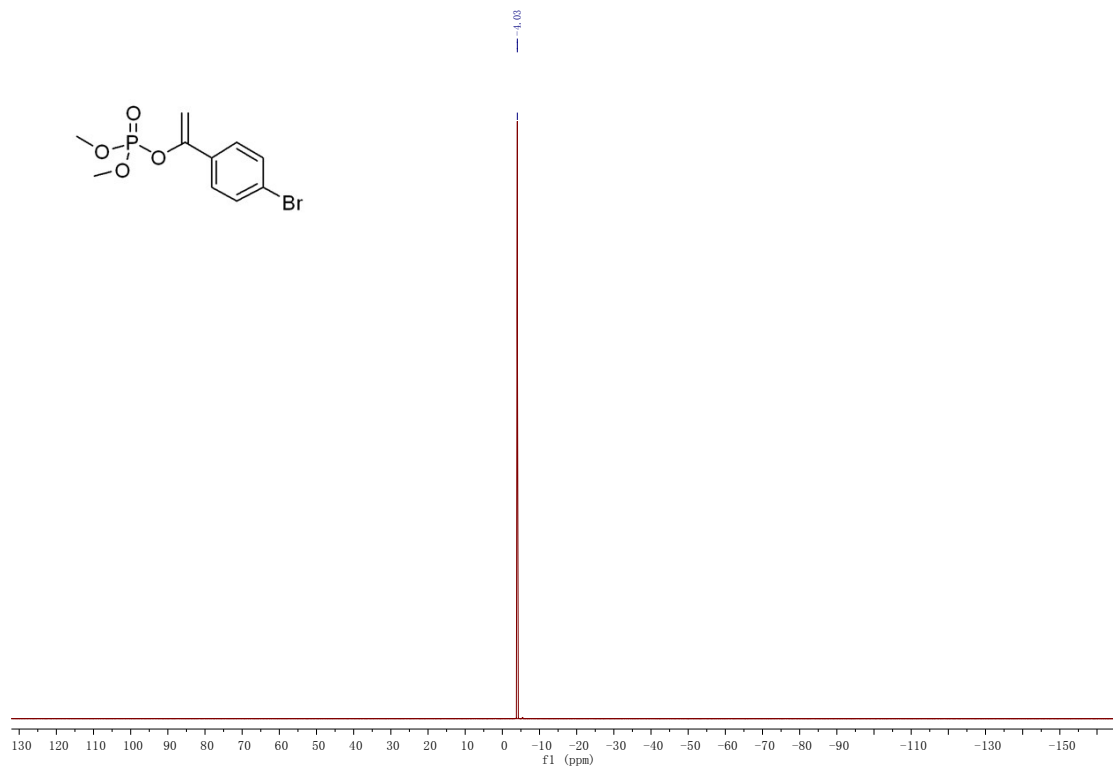

Fig.S 19 <sup>31</sup>P NMR of compound **3e**

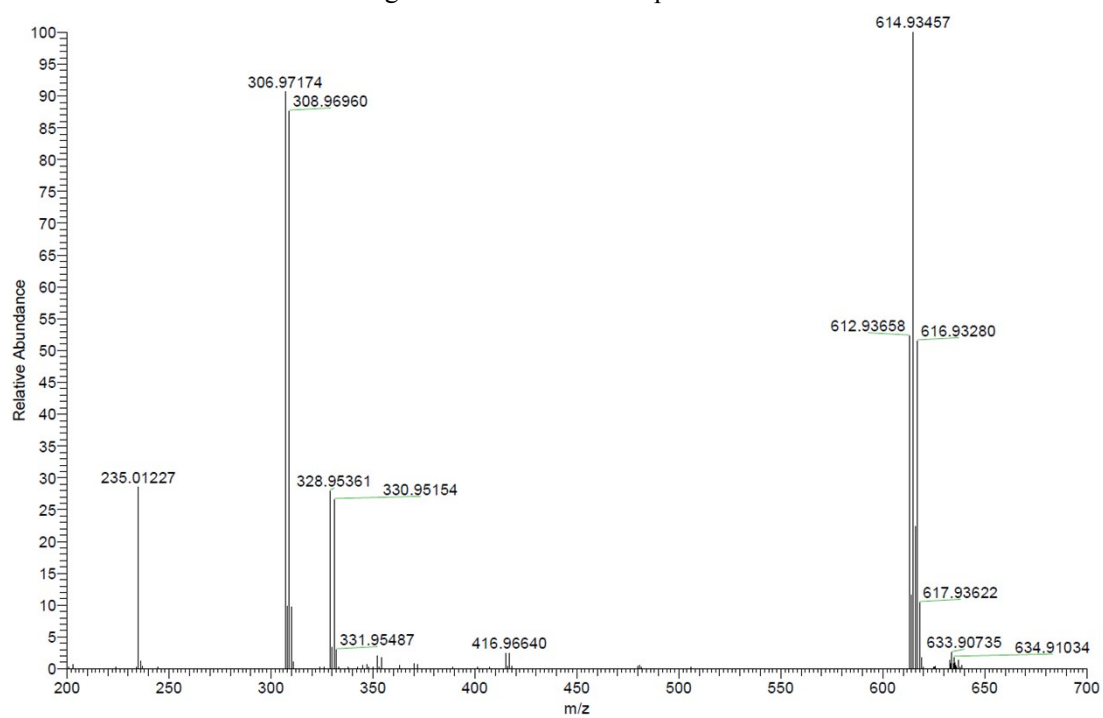

Fig.S 20 HRMS of compound **3e**

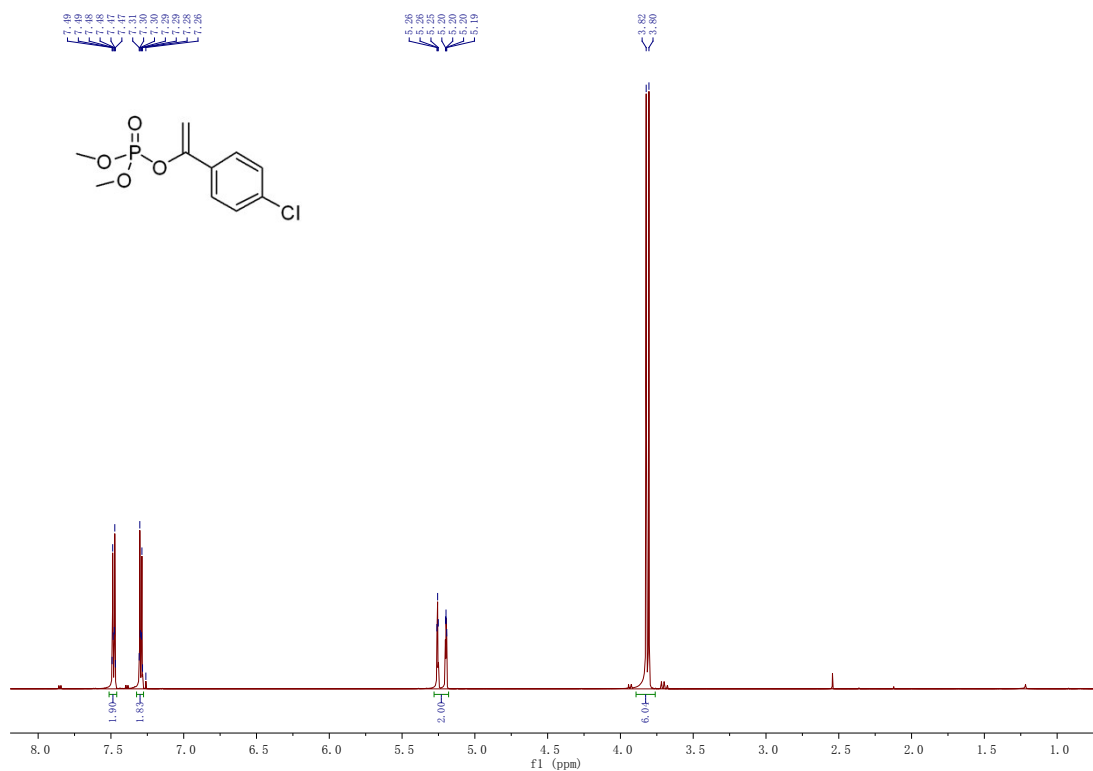

Fig.S 21 <sup>1</sup>H NMR of compound 3f

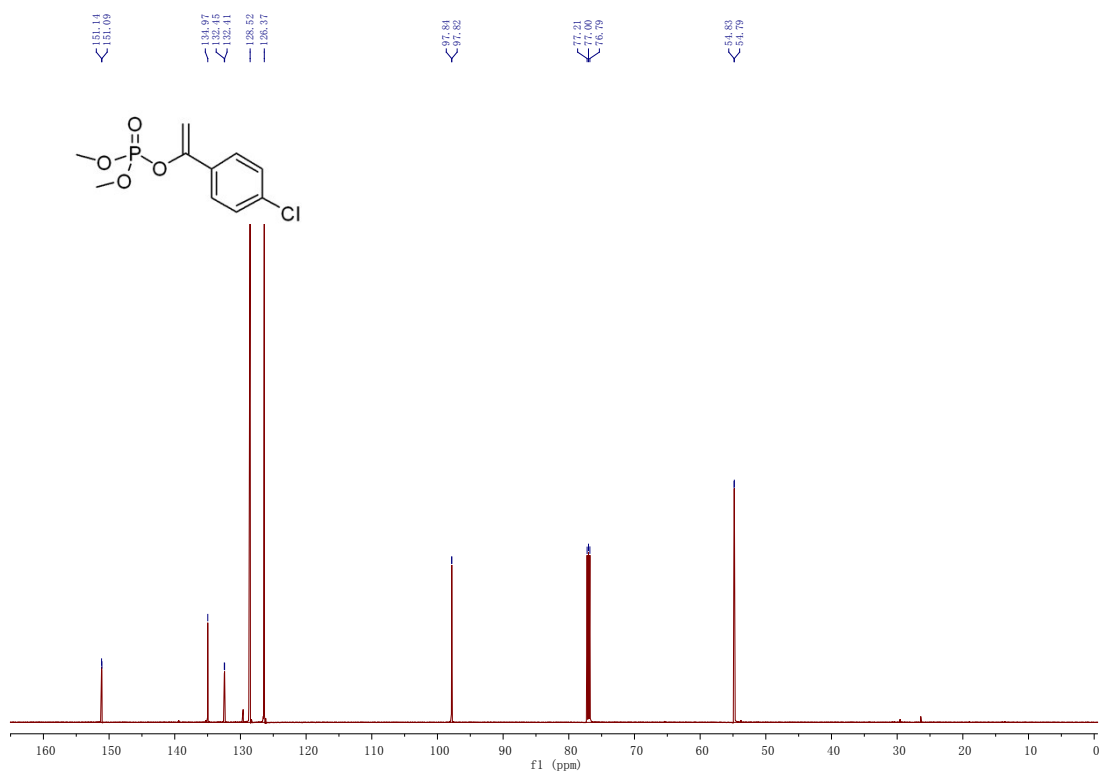

Fig.S 22 <sup>13</sup>C NMR of compound 3f

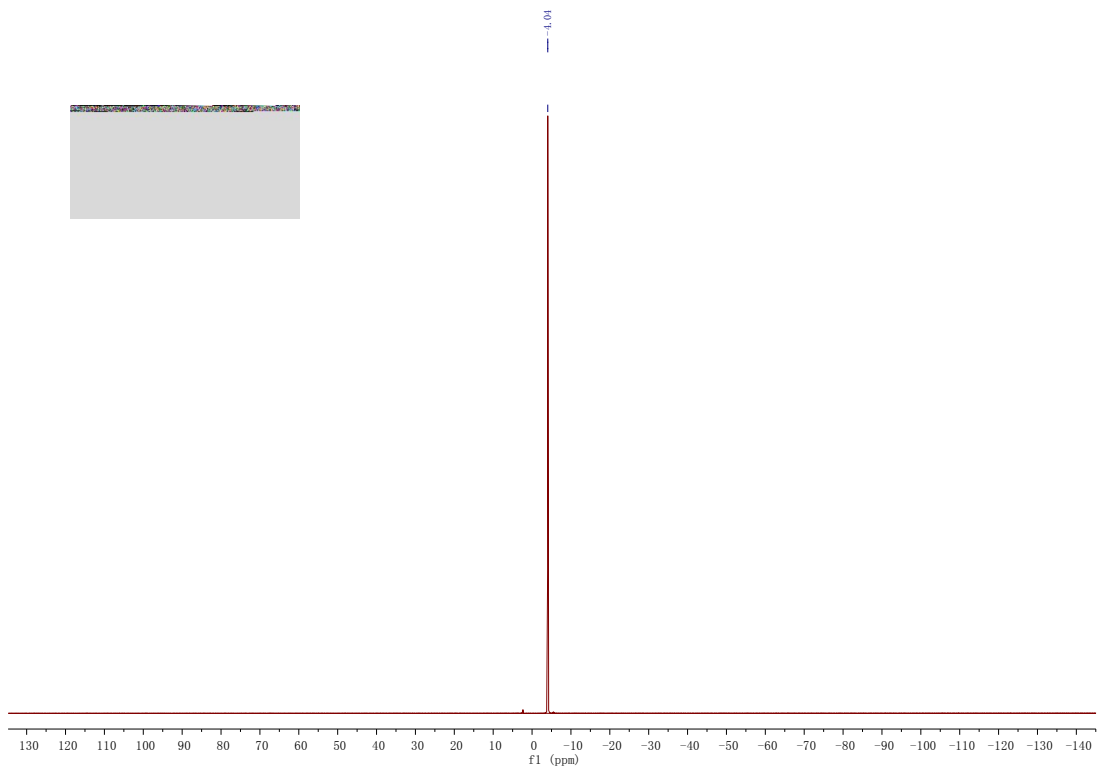

Fig.S 23  $^{31}\text{P}$  NMR of compound **3f**

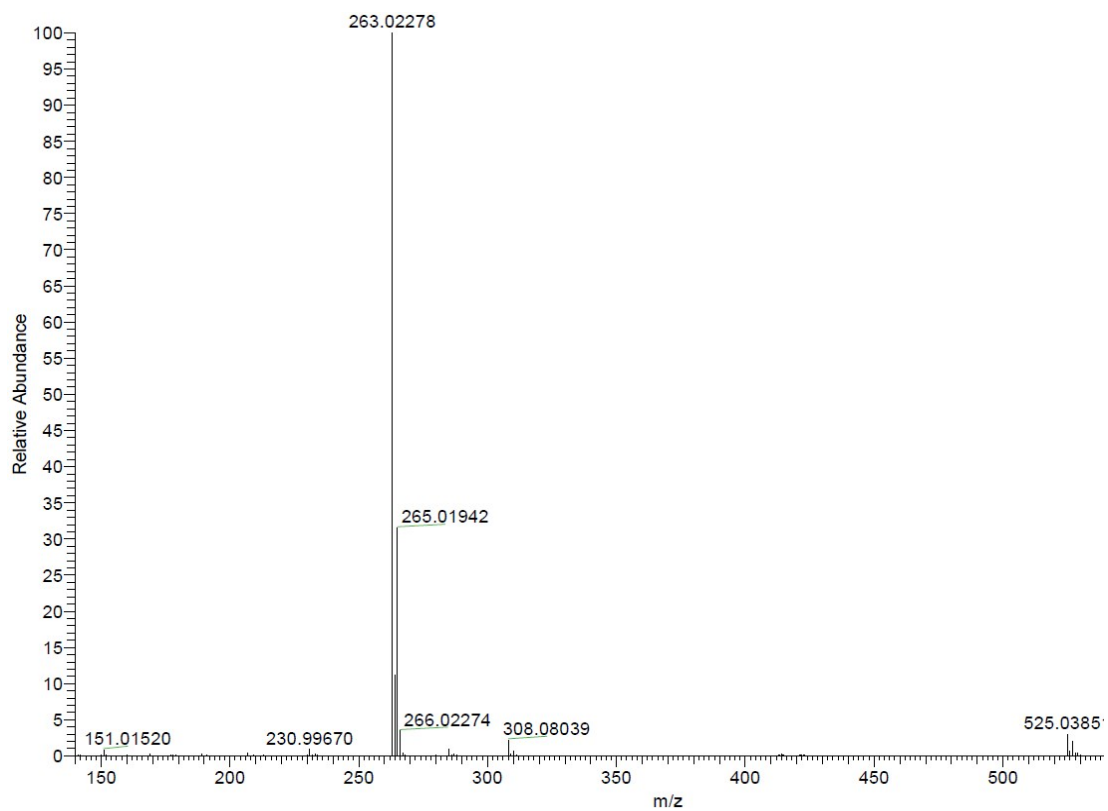

Fig.S 24 HRMS of compound **3f**

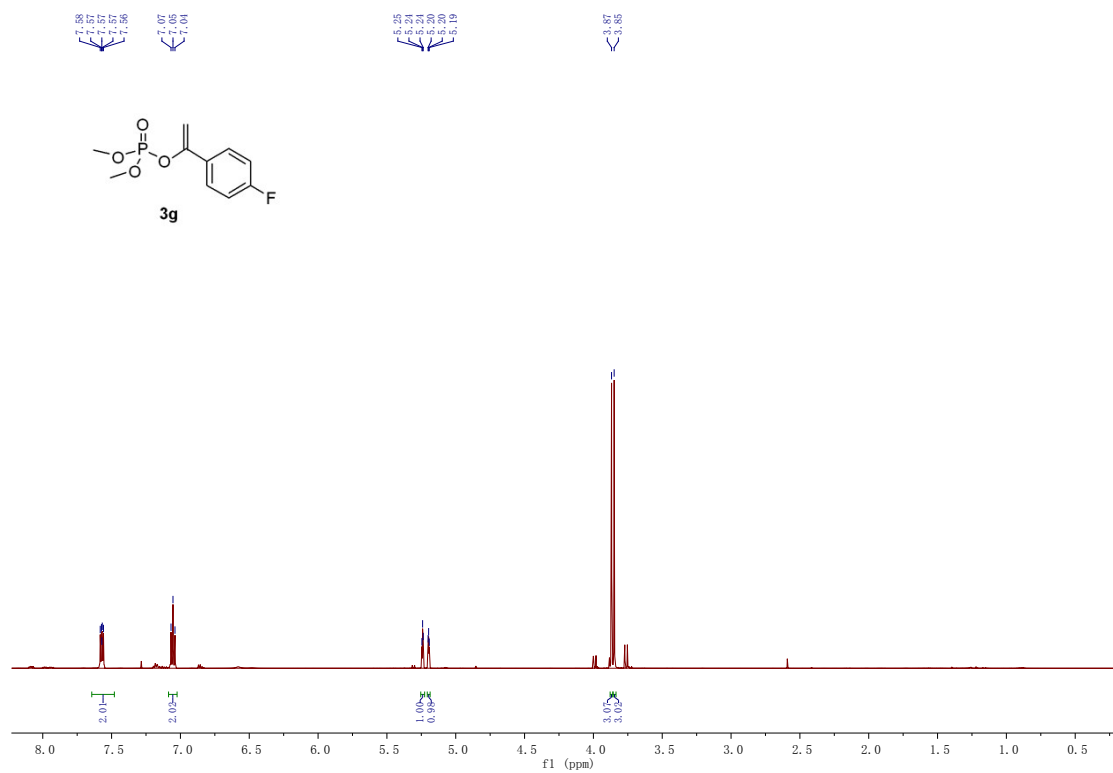

Fig.S 25 <sup>1</sup>H NMR of compound **3g**

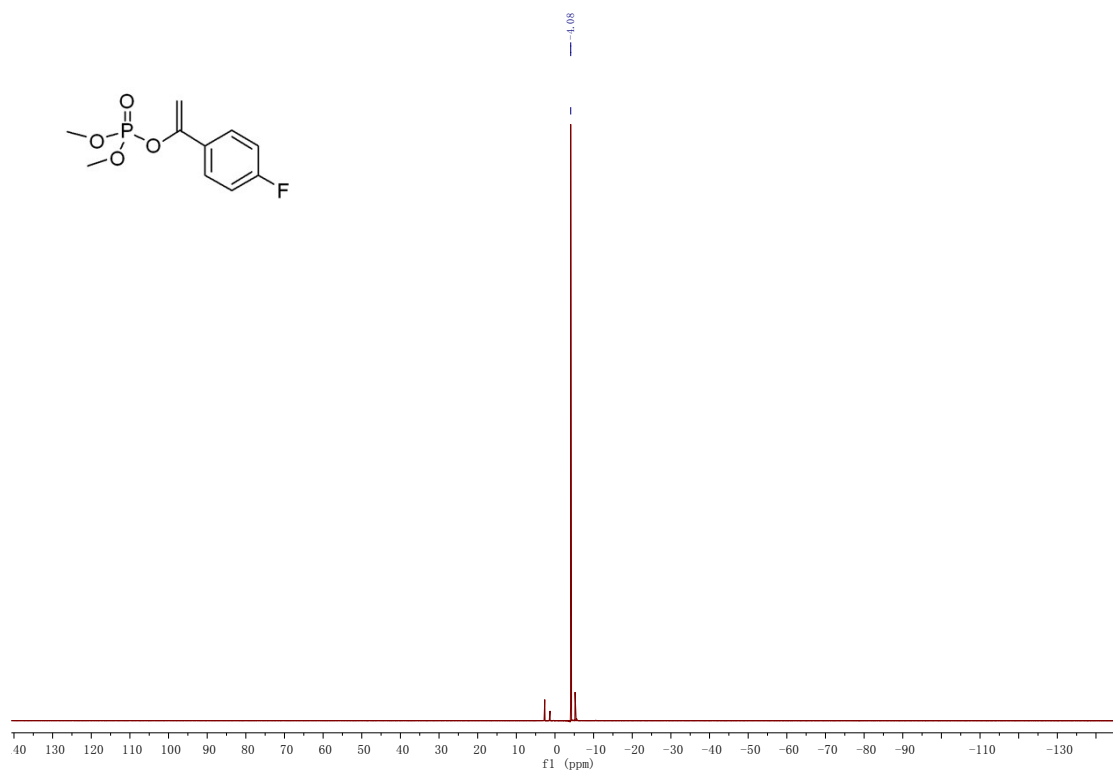

Fig.S 26 <sup>13</sup>C NMR of compound **3g**

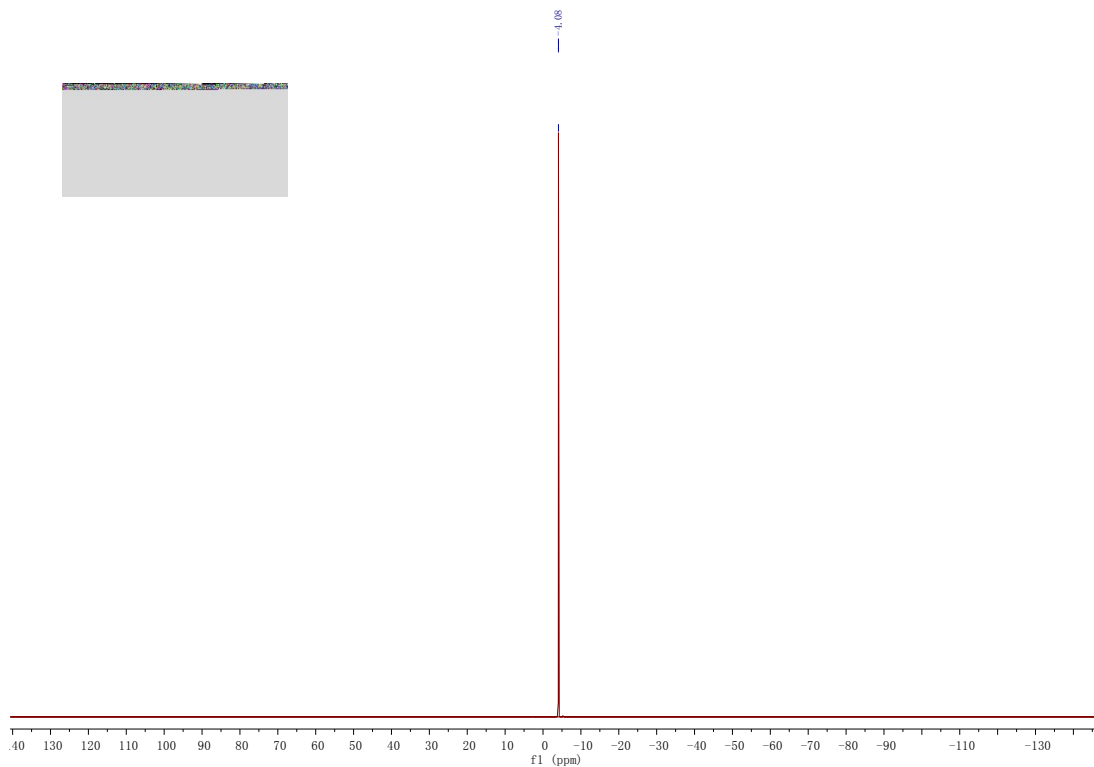

Fig.S 27  $^{31}\text{P}$  NMR of compound **3g**

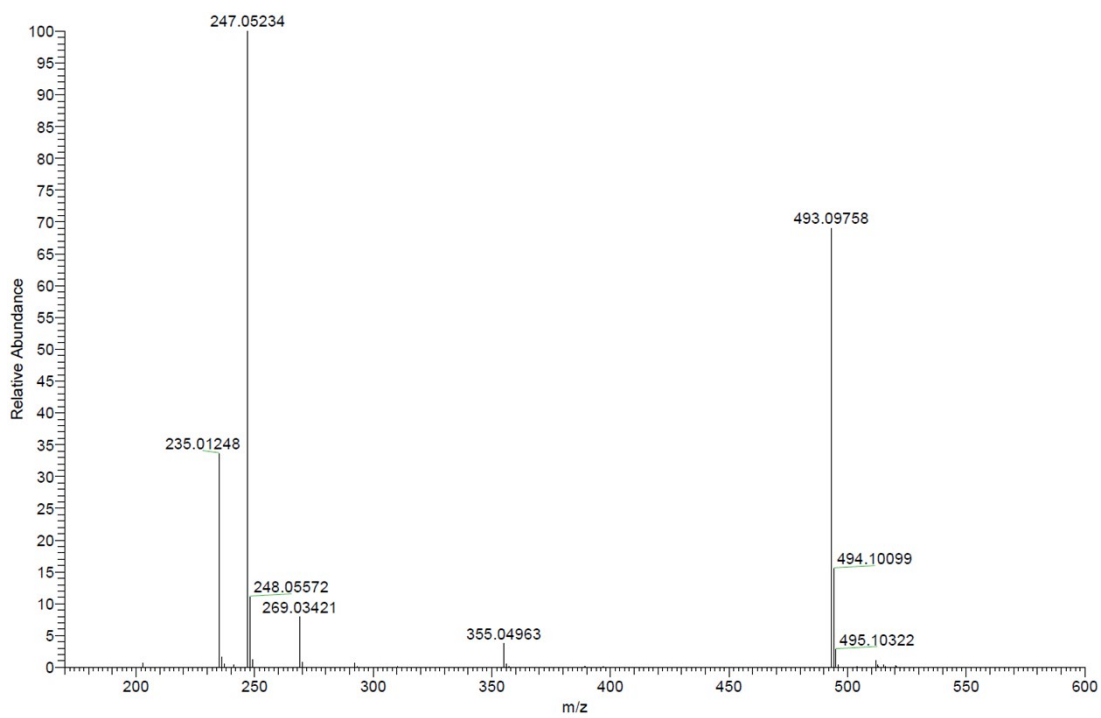

Fig.S 28 HRMS of compound **3g**





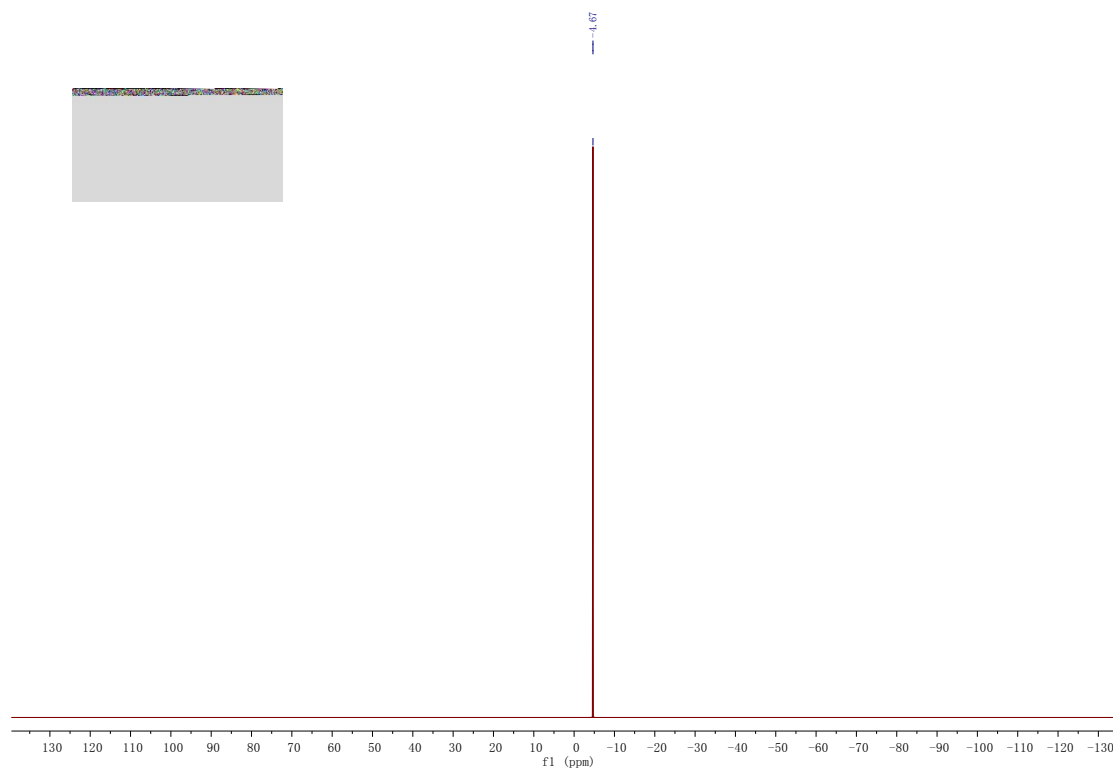

Fig.S 31  $^{31}\text{P}$  NMR of compound **3h**

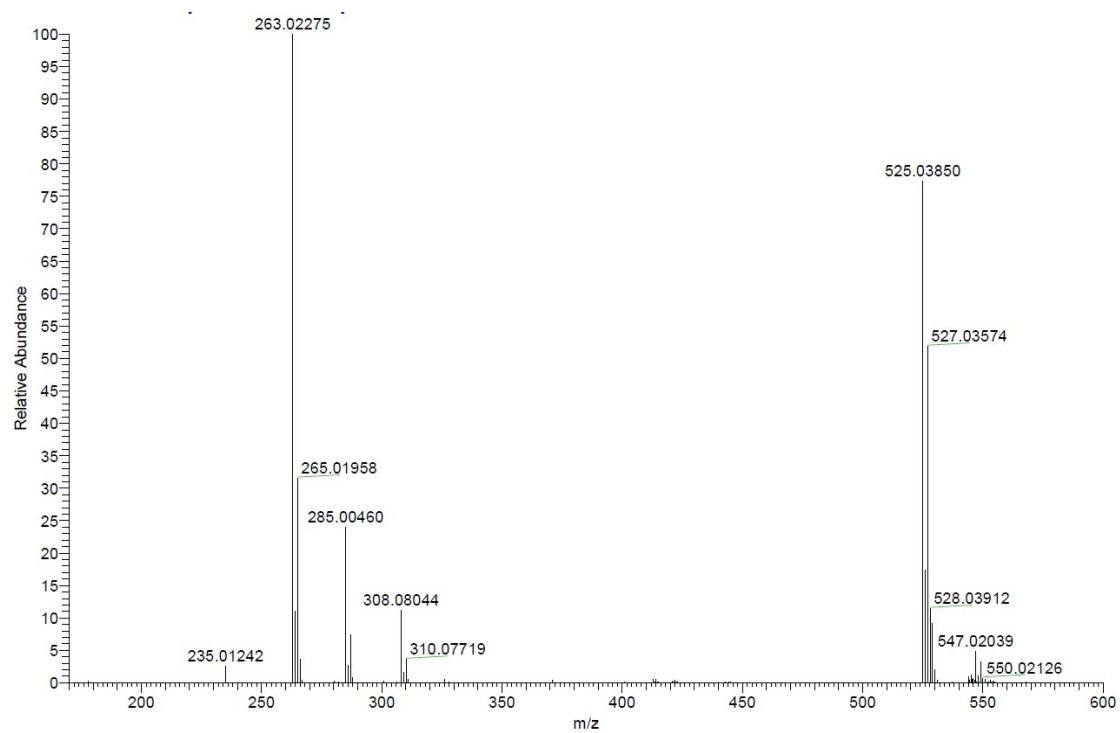

Fig.S 32 HRMS of compound **3h**

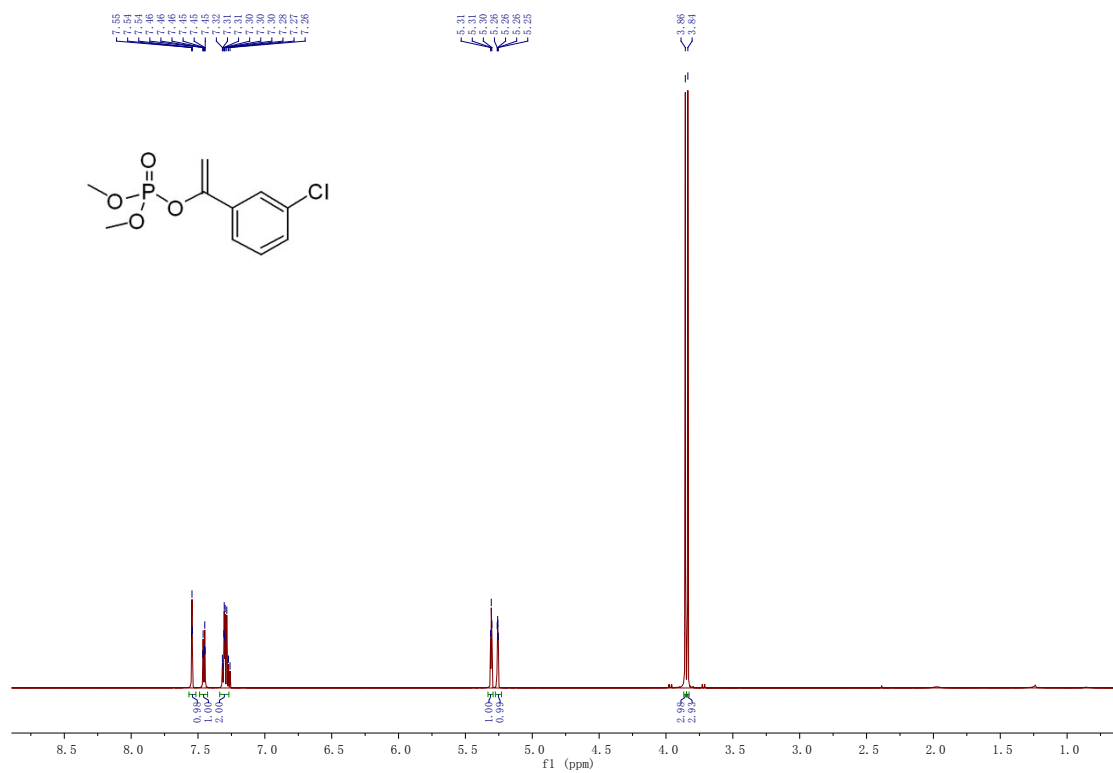

Fig.S 33 <sup>1</sup>H NMR of compound 3i

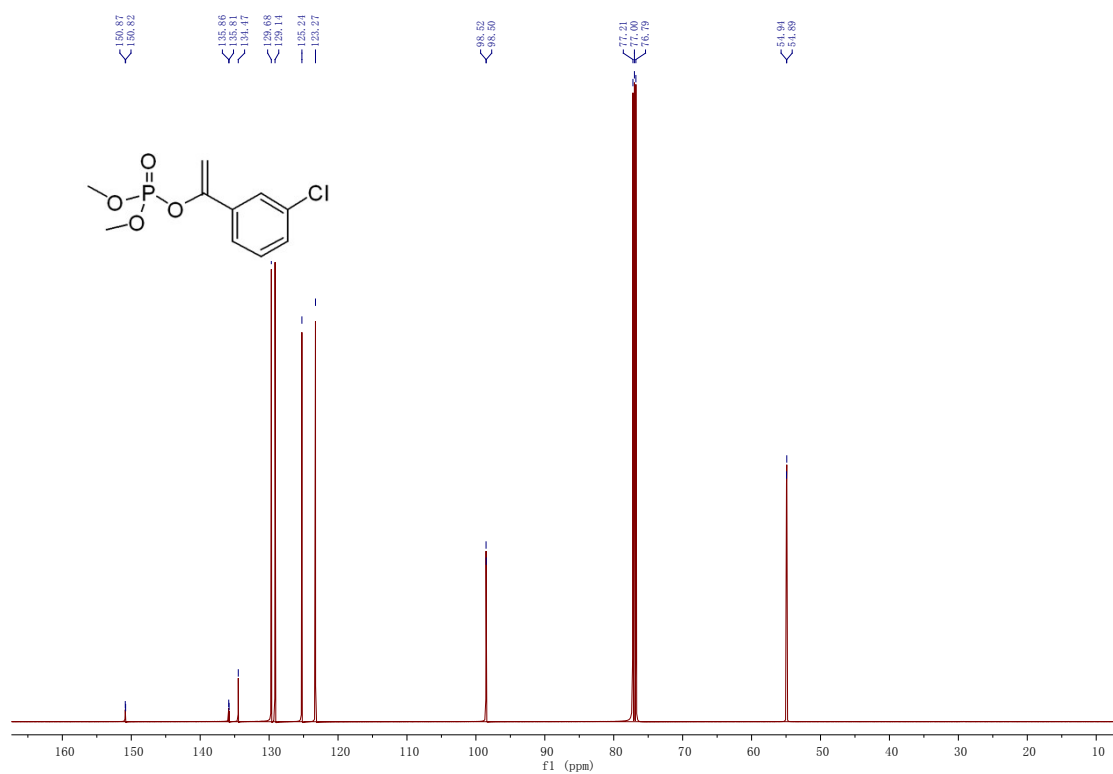

Fig.S 34 <sup>13</sup>C NMR of compound 3i

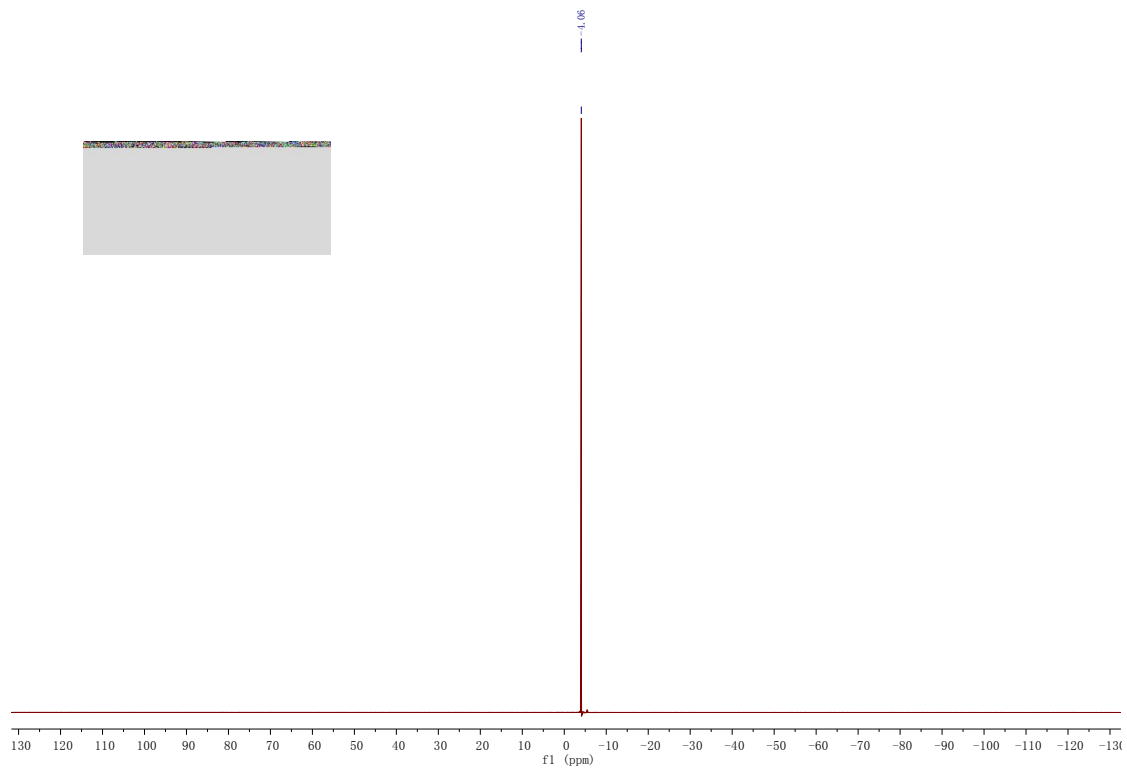

Fig.S 35  $^{31}\text{P}$  NMR of compound **3i**

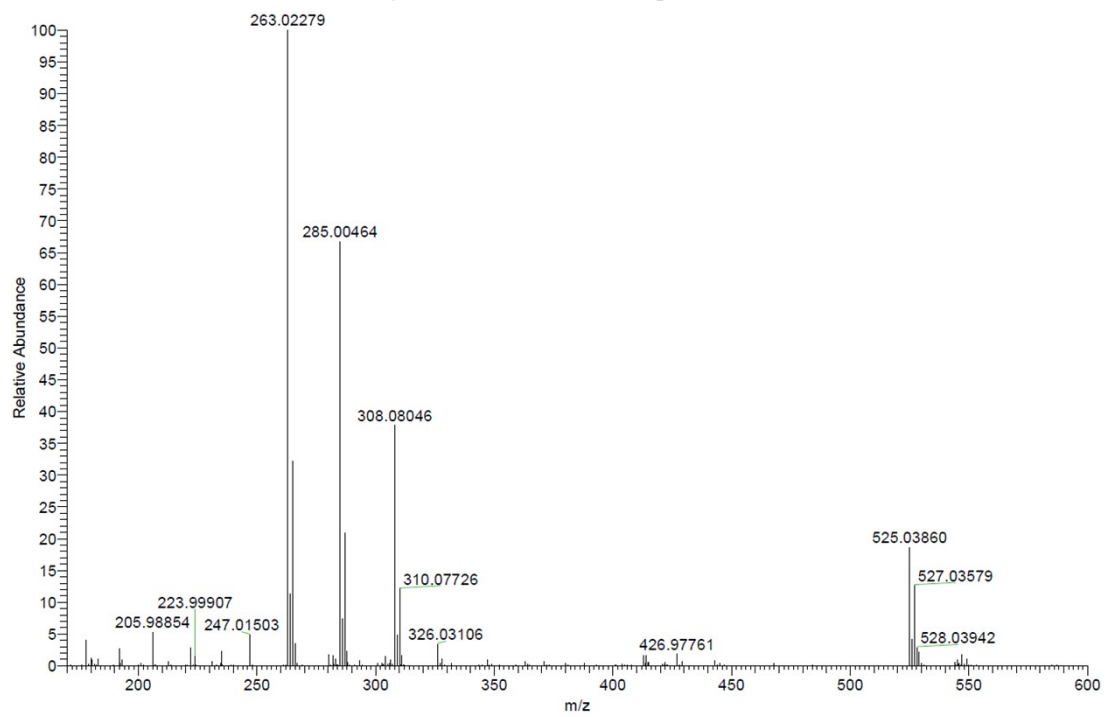

Fig.S 36 HRMS of compound **3i**

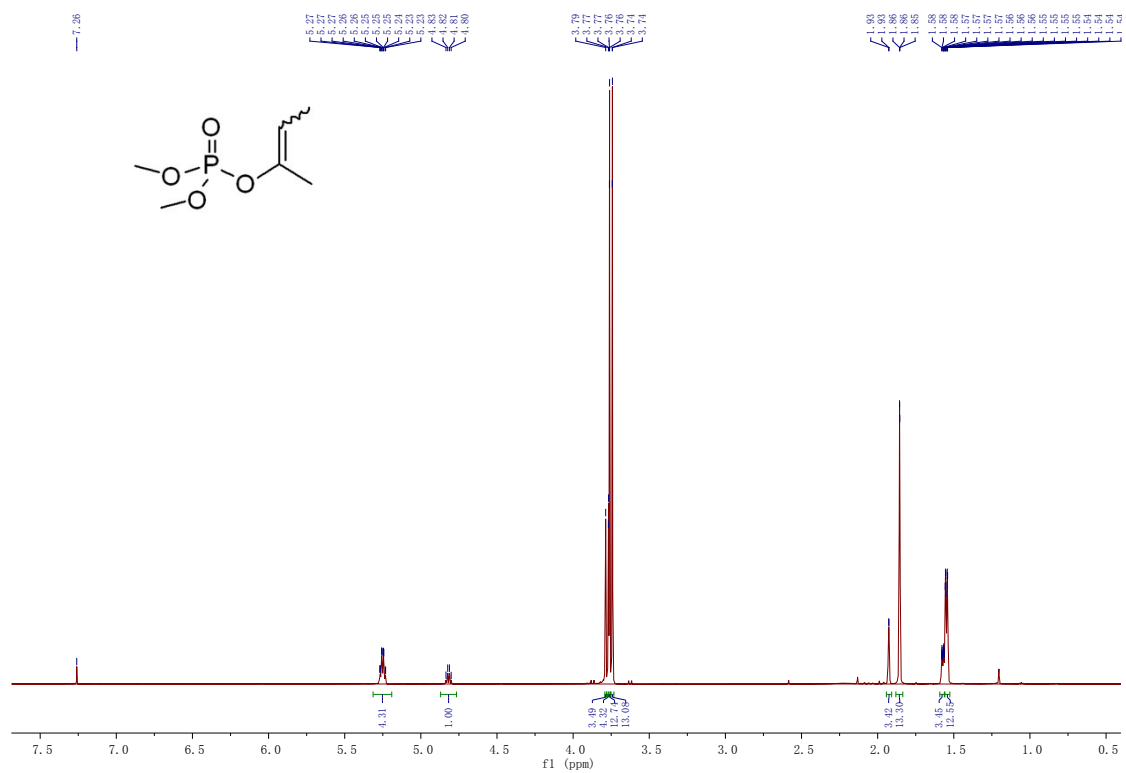

Fig.S 37 <sup>1</sup>H NMR of compound **3j**

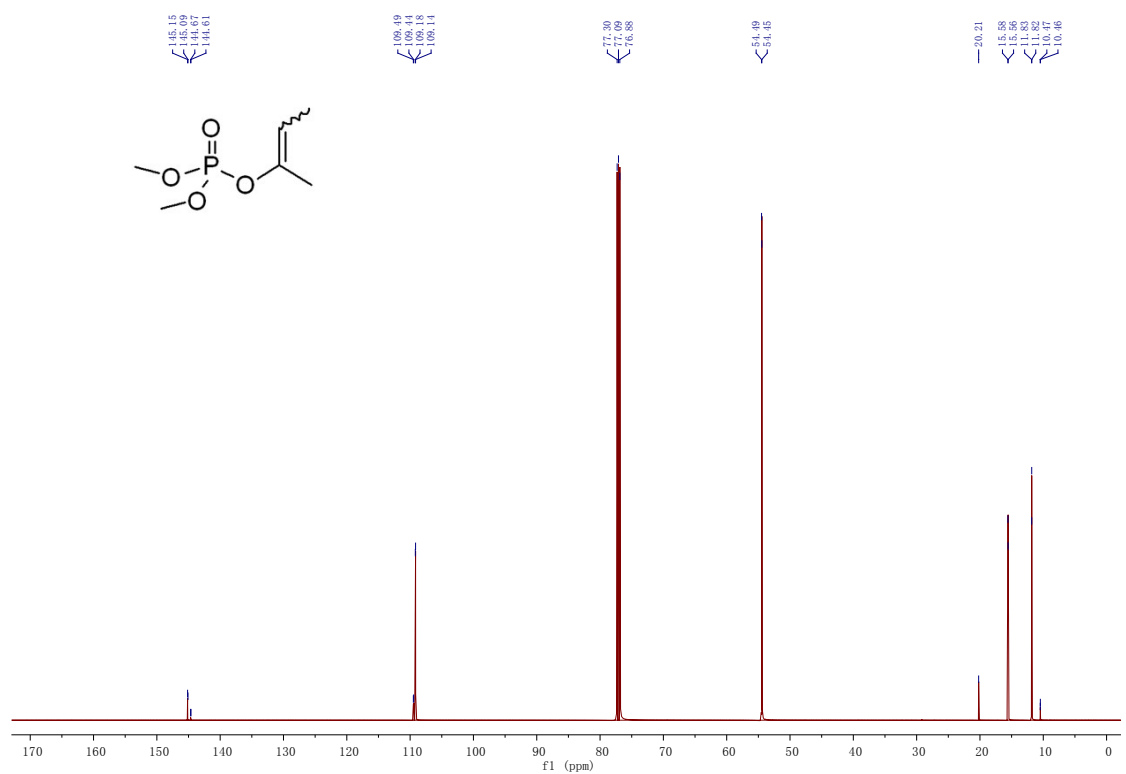

Fig.S 38 <sup>13</sup>C NMR of compound **3j**

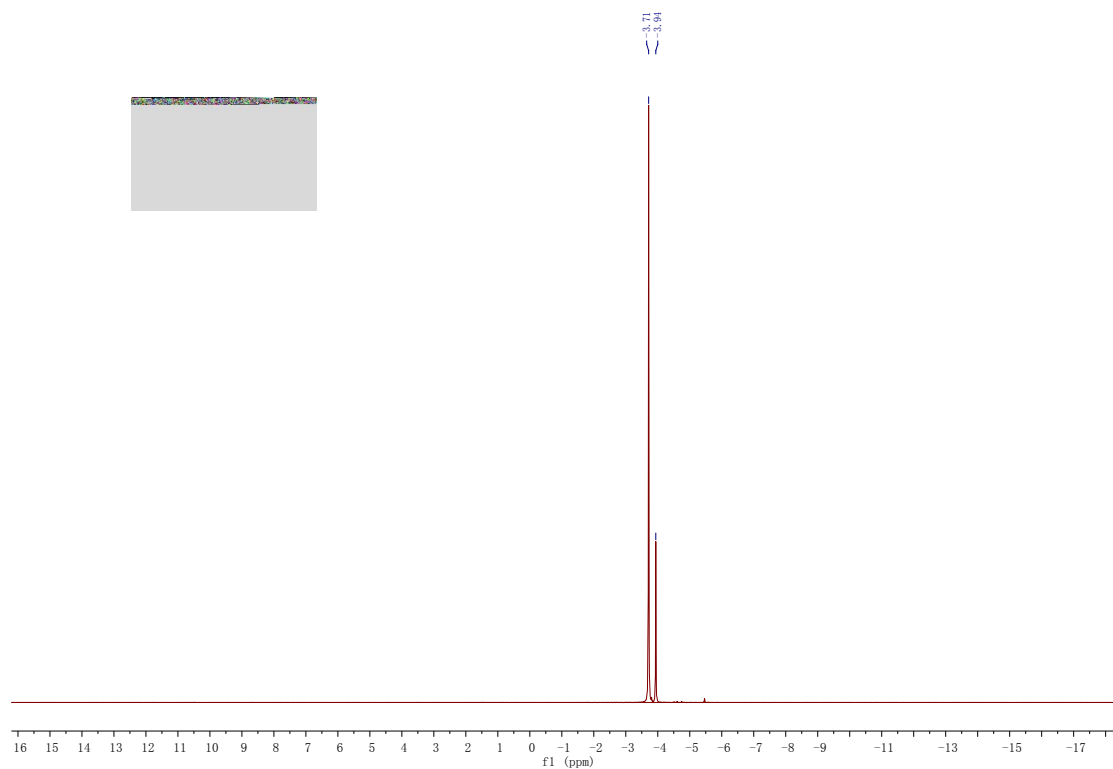

Fig.S 39  $^{31}\text{P}$  NMR of compound **3j**

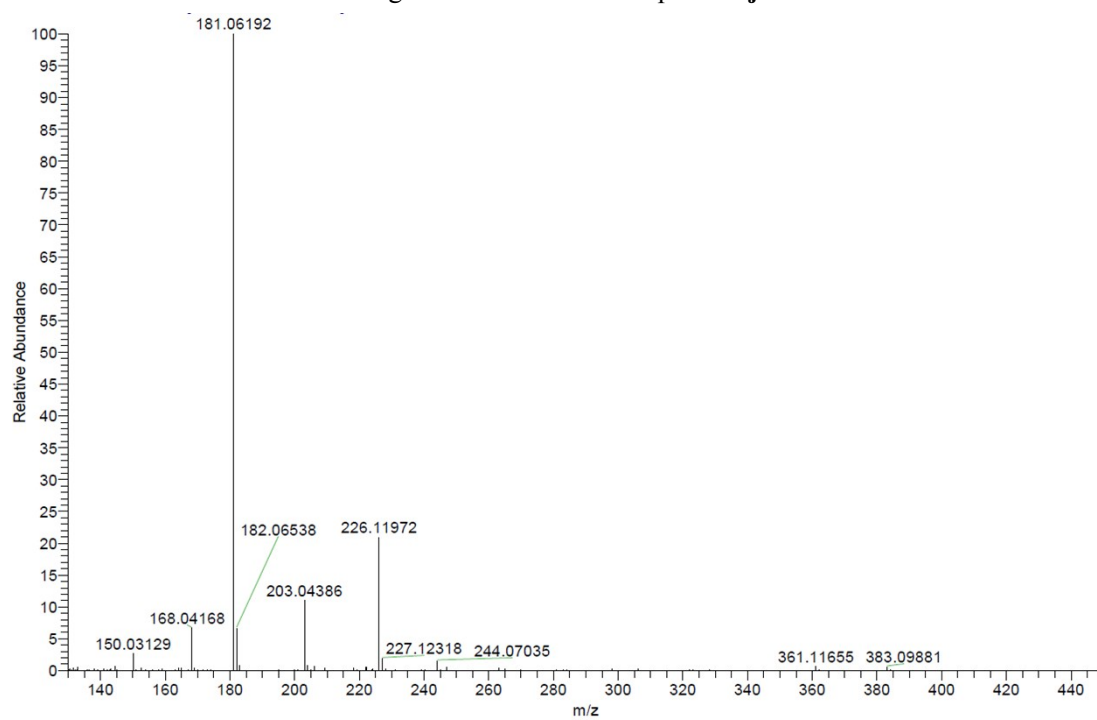

Fig.S 40 HRMS of compound **3j**

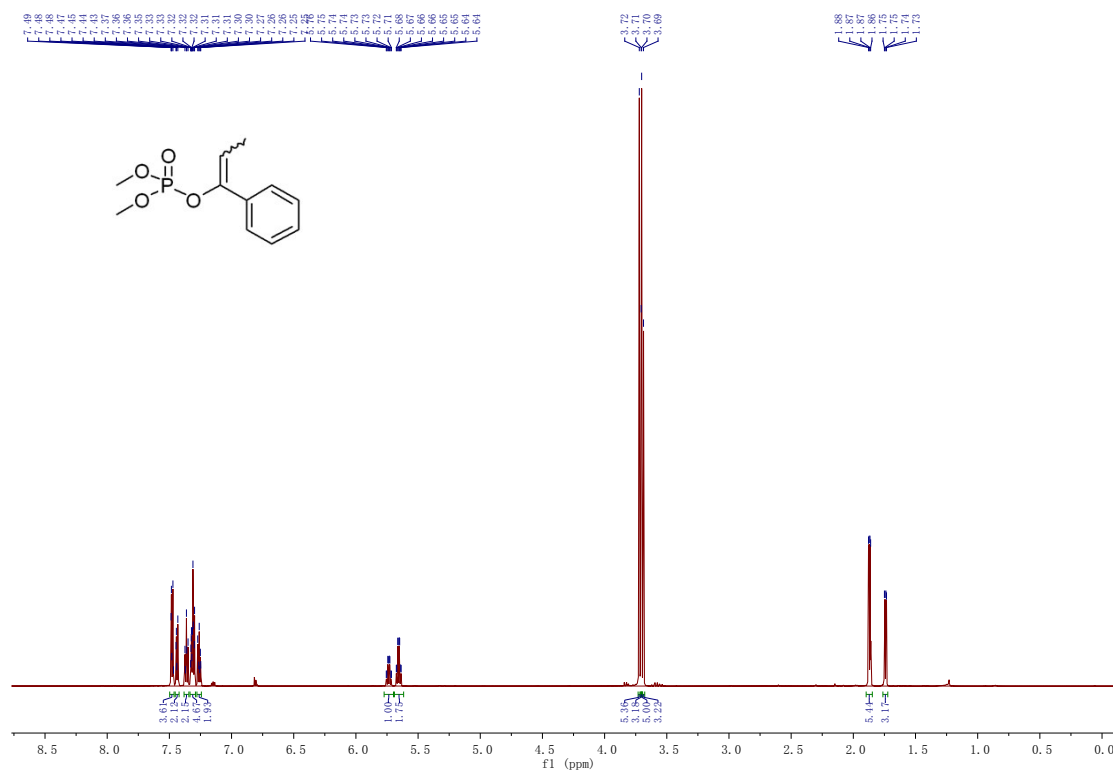

Fig.S 41 <sup>1</sup>H NMR of compound 3k

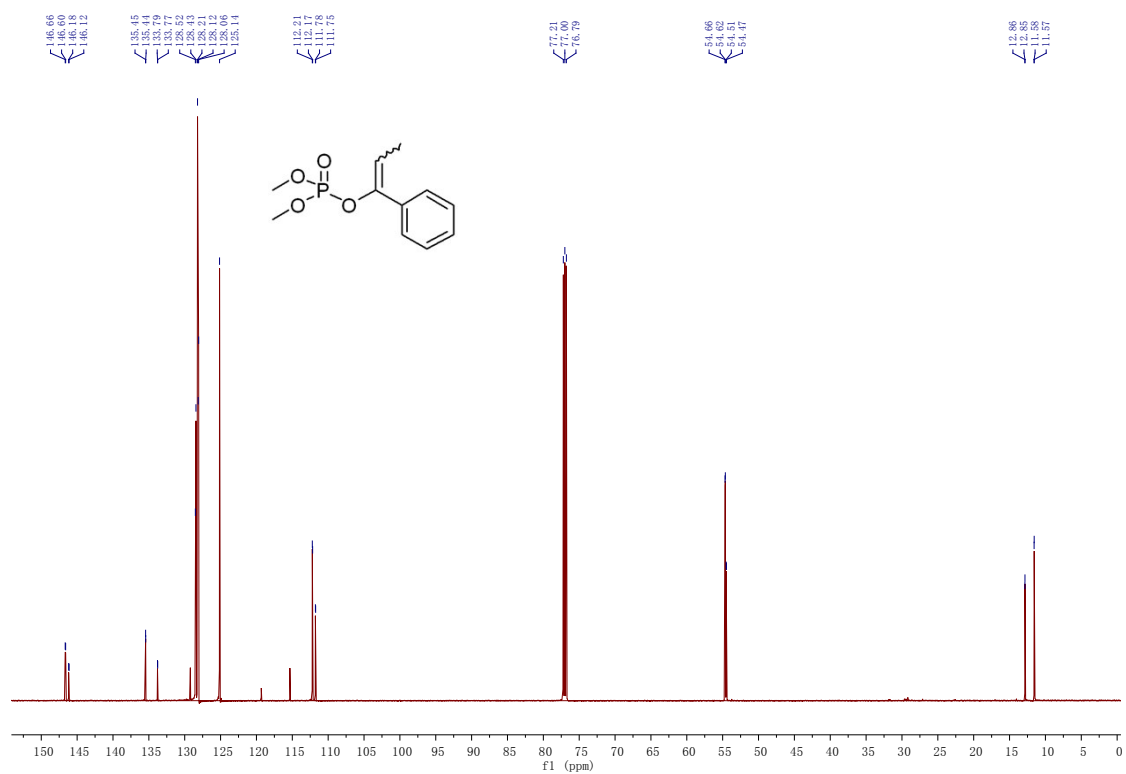

Fig.S 42 <sup>13</sup>C NMR of compound 3k

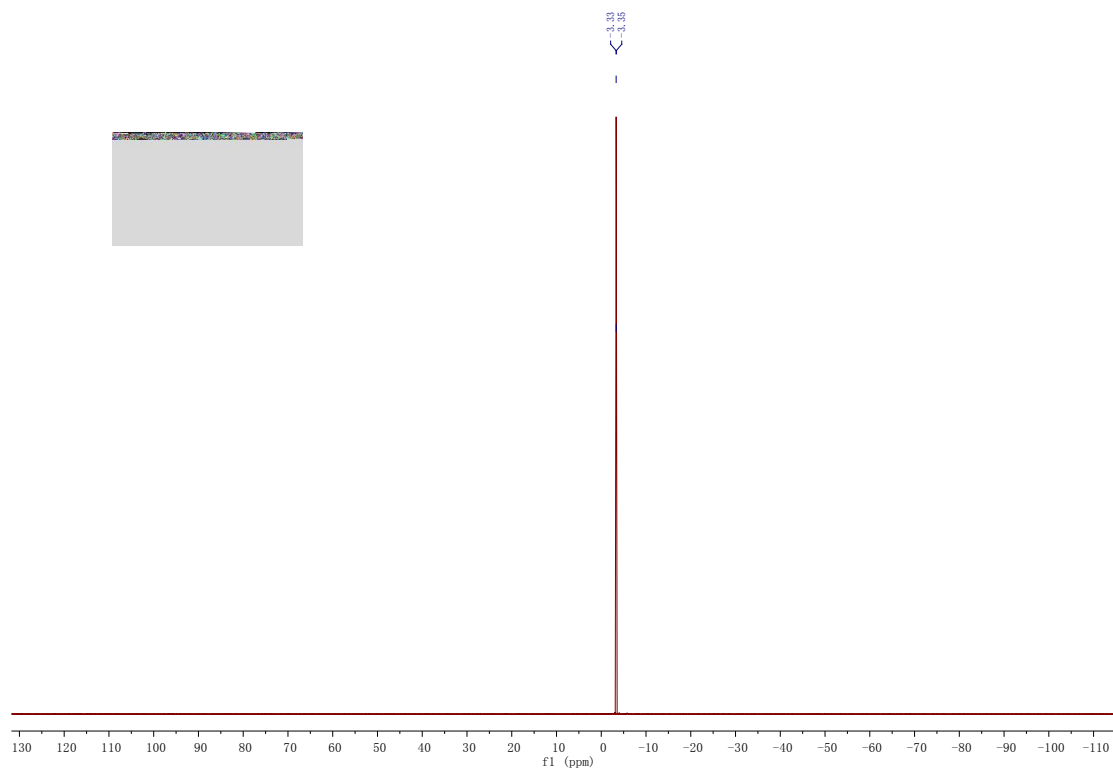

Fig.S 43  $^{31}\text{P}$  NMR of compound **3k**

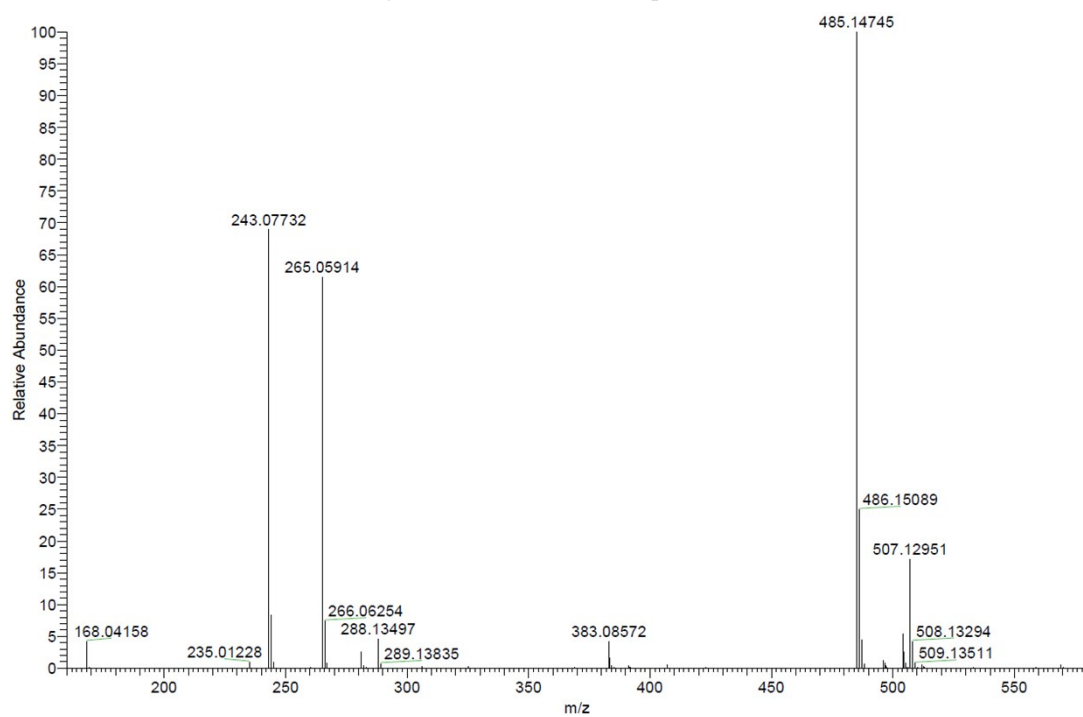

Fig.S 44 HRMS of compound **3k**



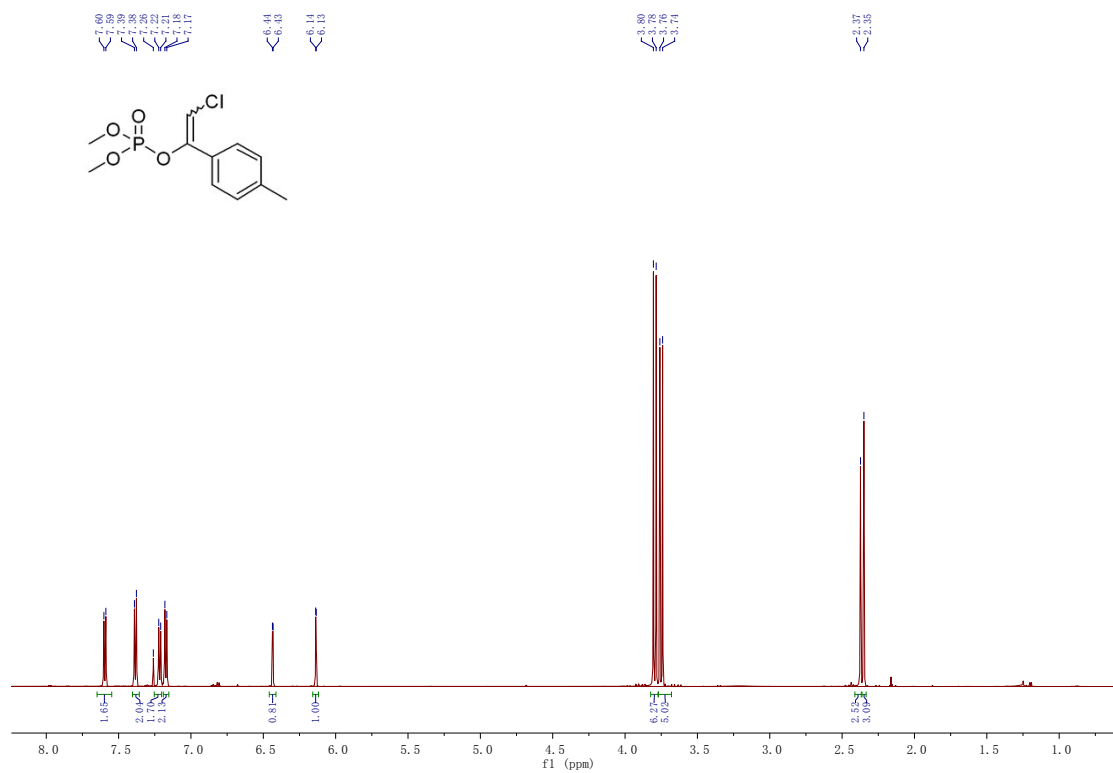

Fig.S 45 <sup>1</sup>H NMR of compound 31

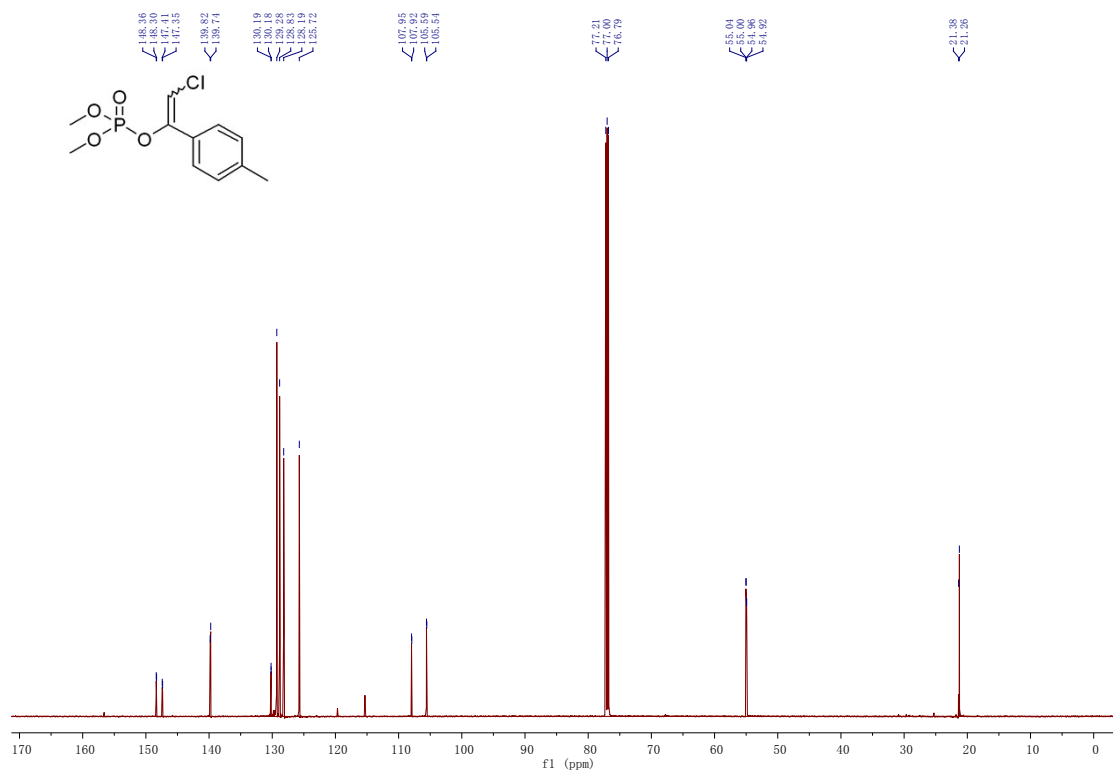

Fig.S 46 <sup>13</sup>C NMR of compound 31

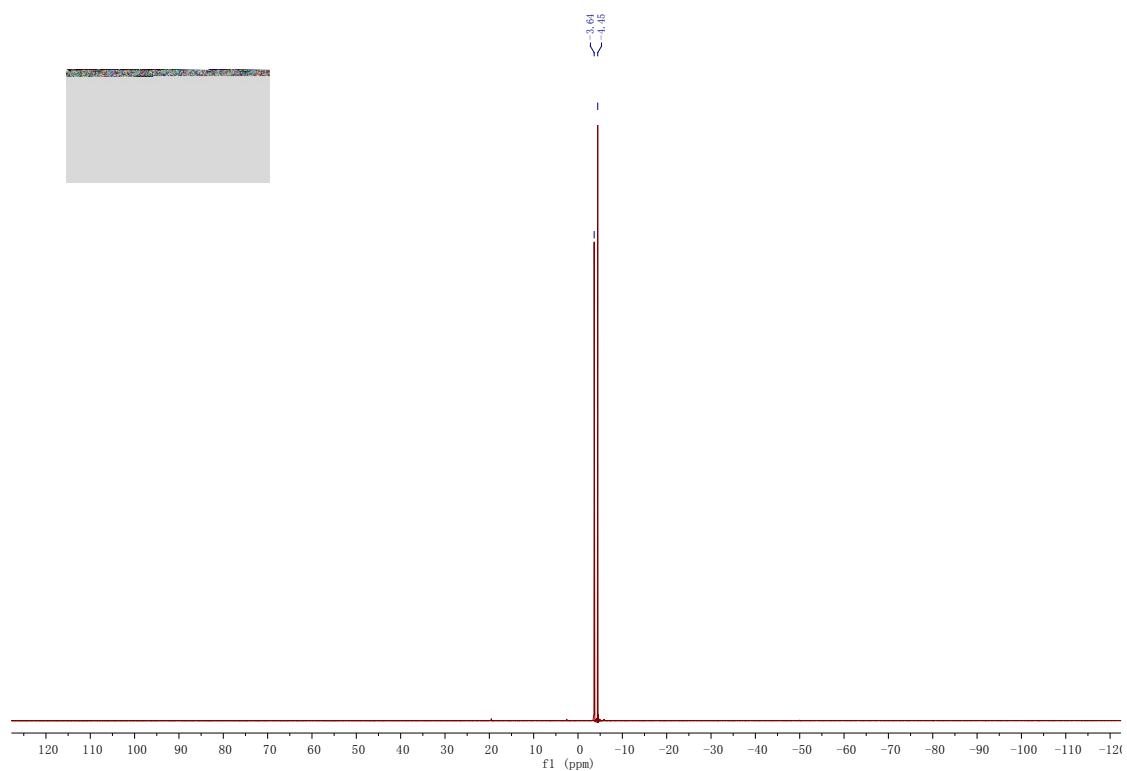

Fig.S 47  $^{31}\text{P}$  NMR of compound **31**

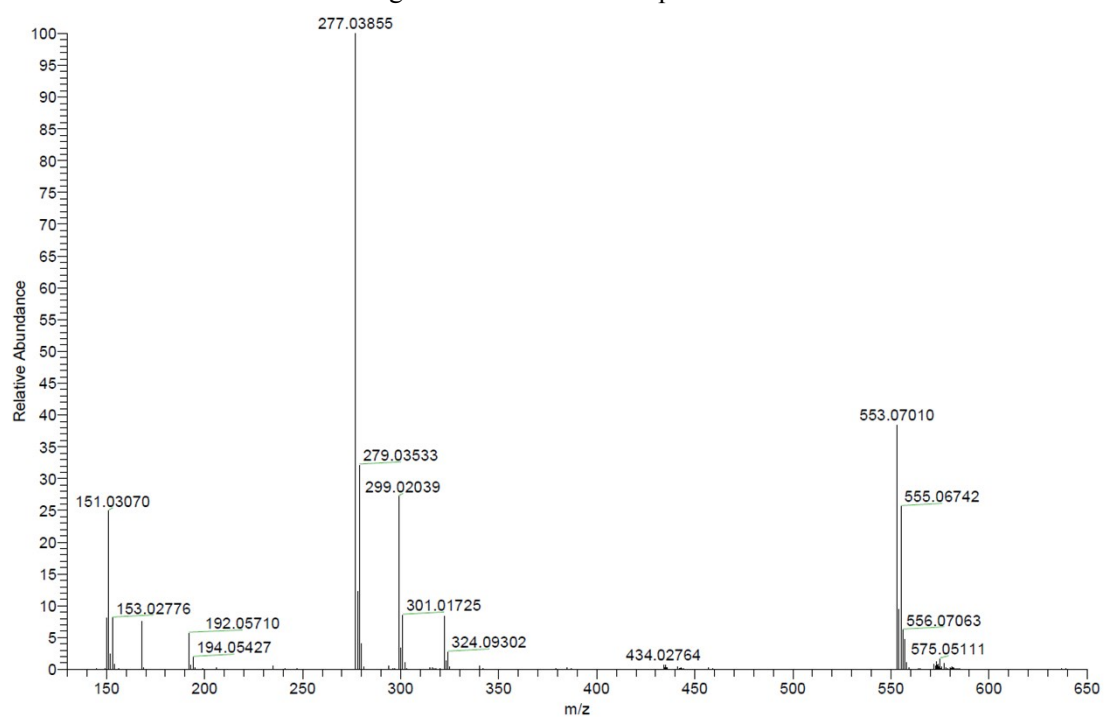

Fig.S 48 HRMS of compound **31**

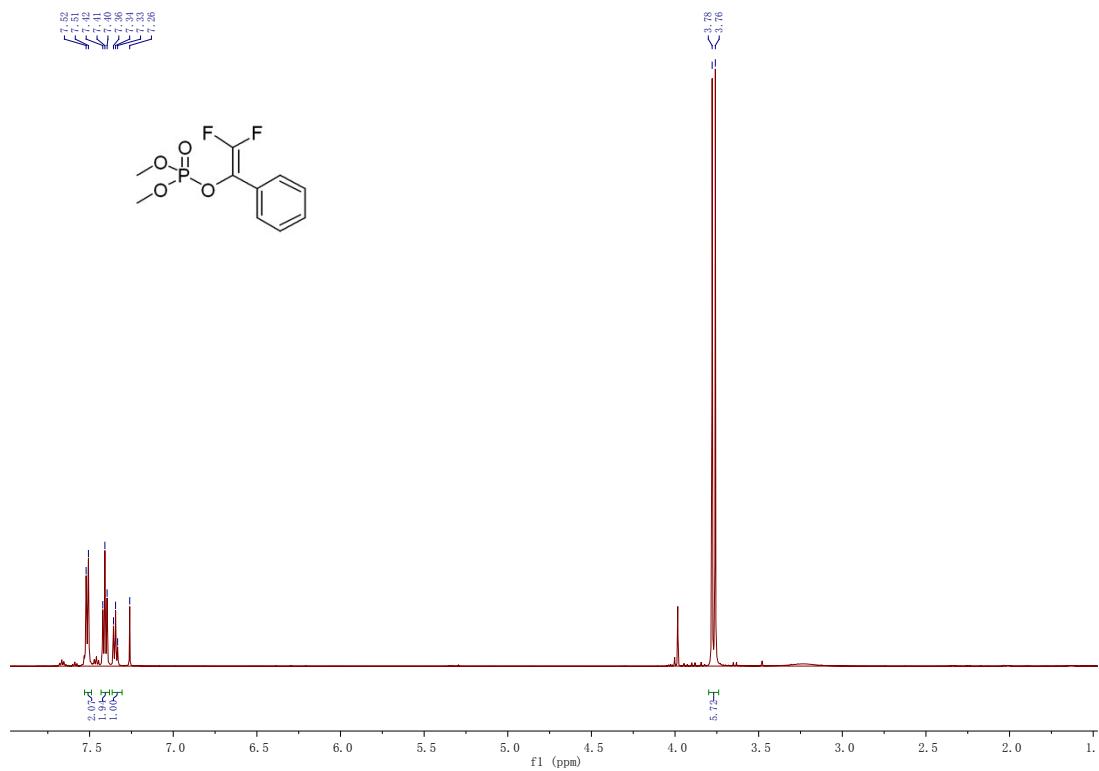

Fig.S 49 <sup>1</sup>H NMR of compound **3m**

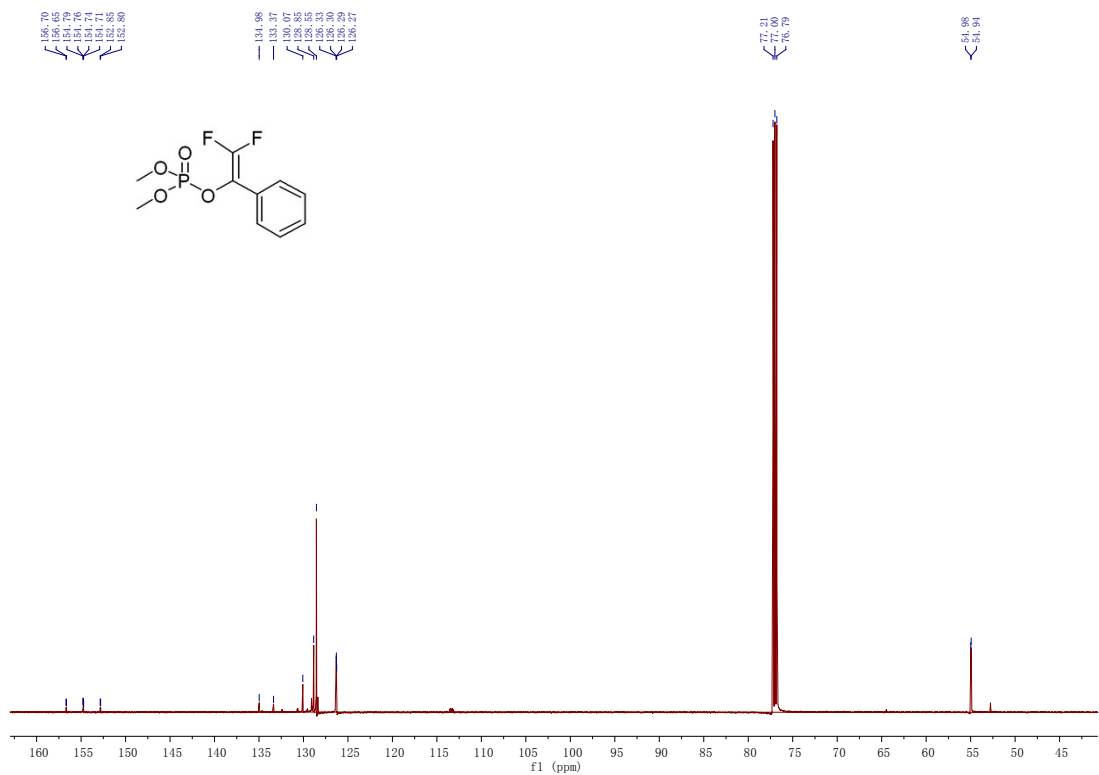

Fig.S 50 <sup>13</sup>C NMR of compound **3m**

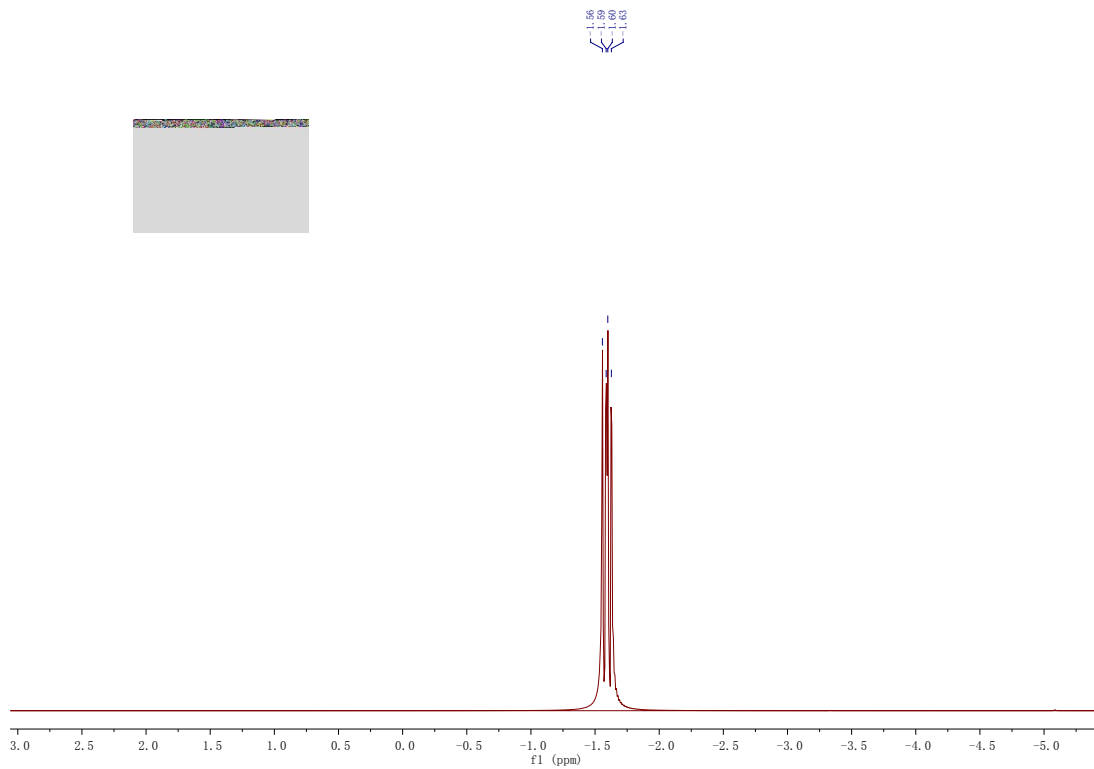

Fig.S 51  $^{31}\text{P}$  NMR of compound **3m**

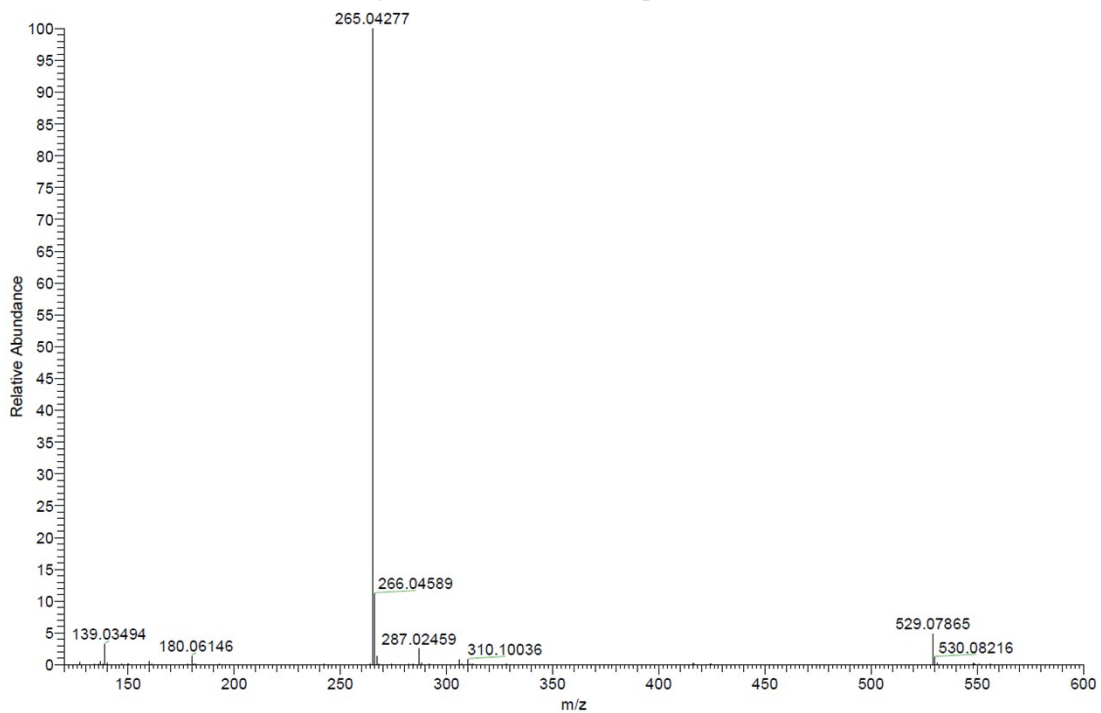

Fig.S 52 HRMS of compound **3m**

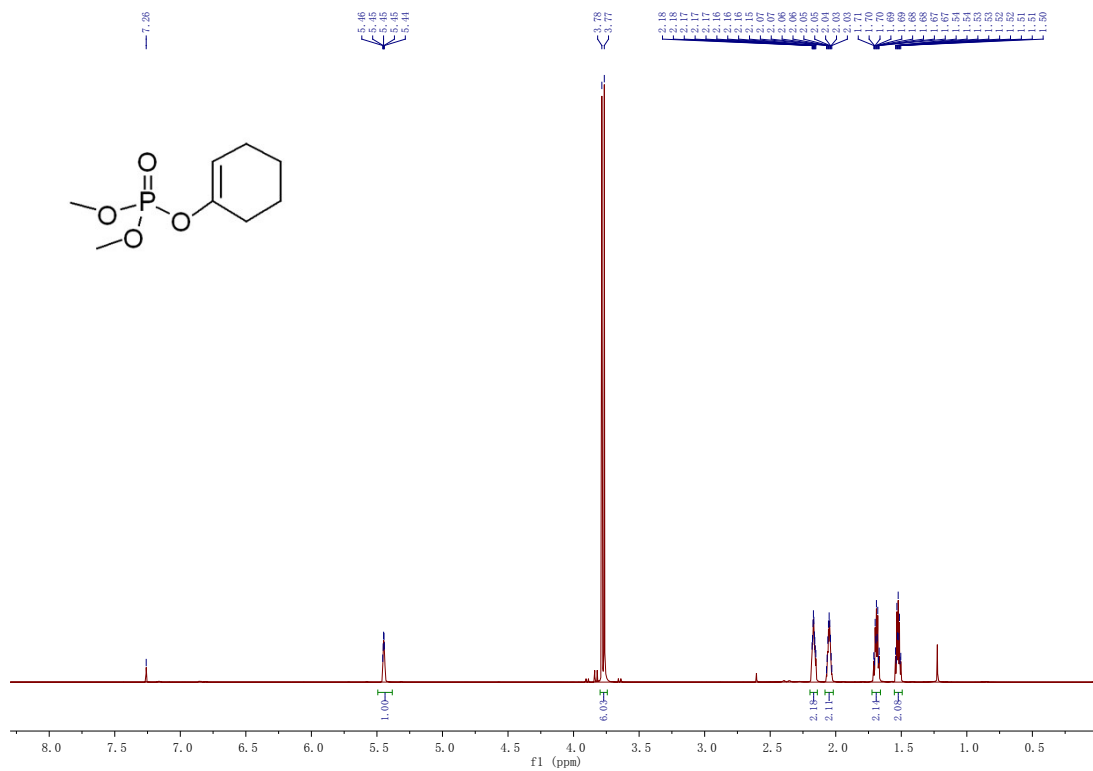

Fig.S 53 <sup>1</sup>H NMR of compound 3n

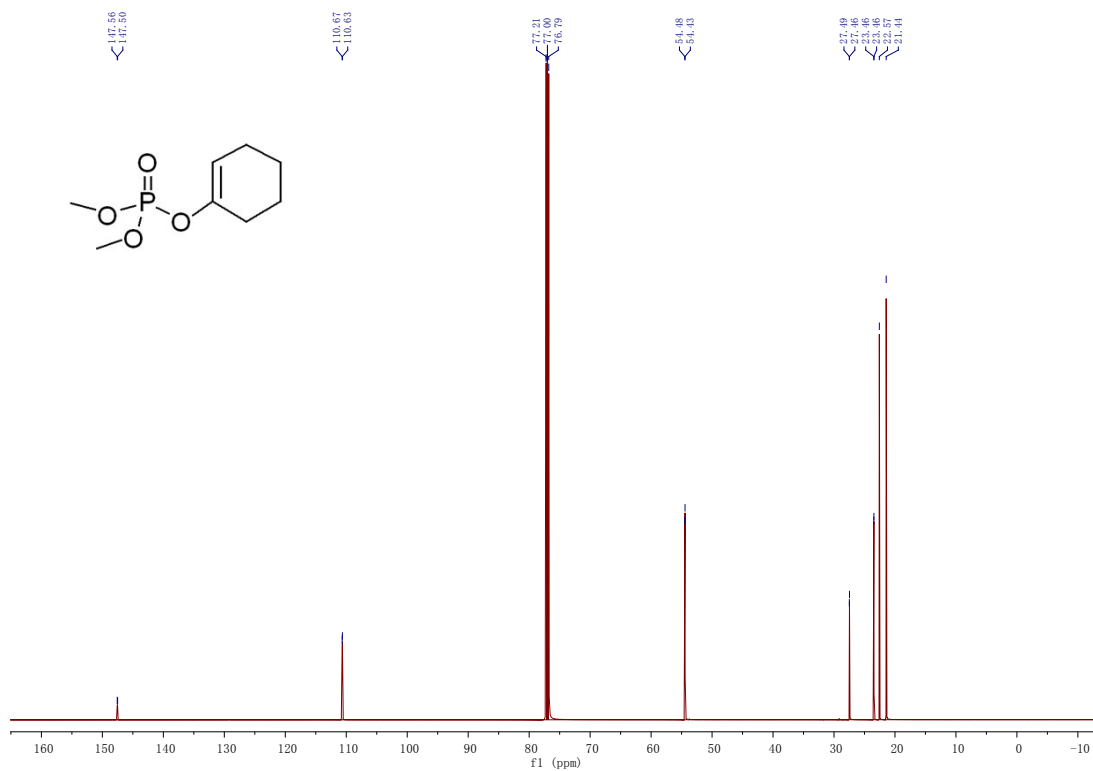

Fig.S 54 <sup>13</sup>C NMR of compound 3n

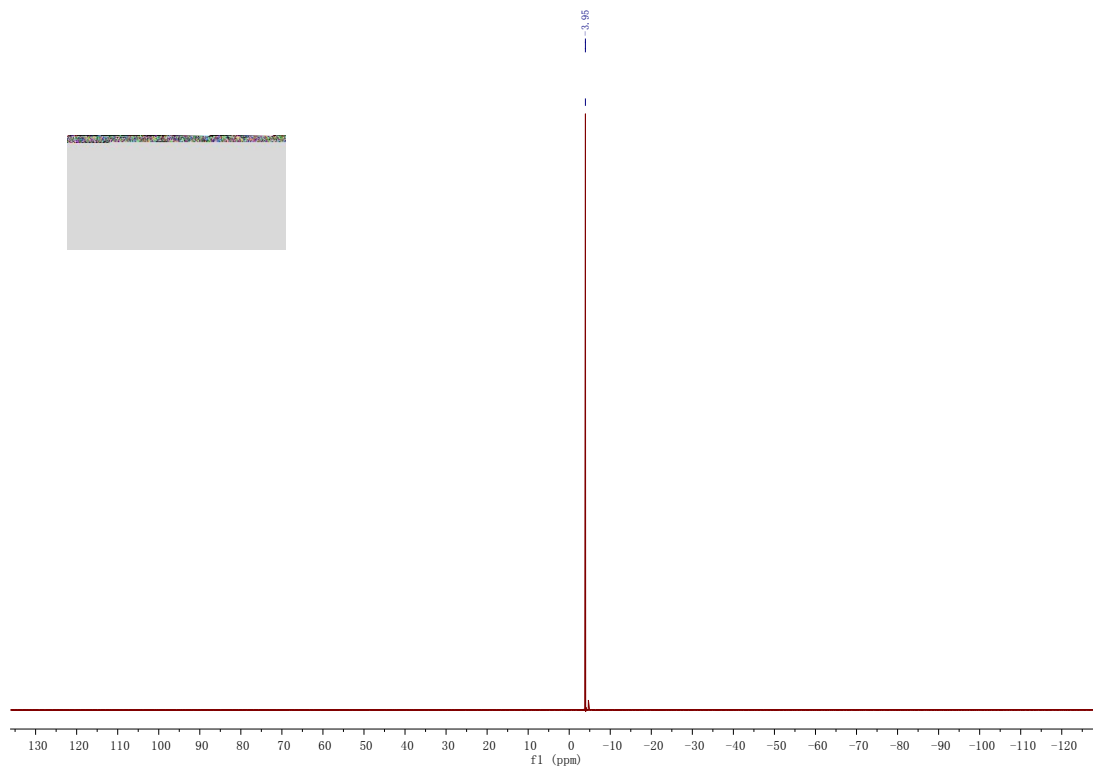

Fig.S 55  $^{31}\text{P}$  NMR of compound **3n**

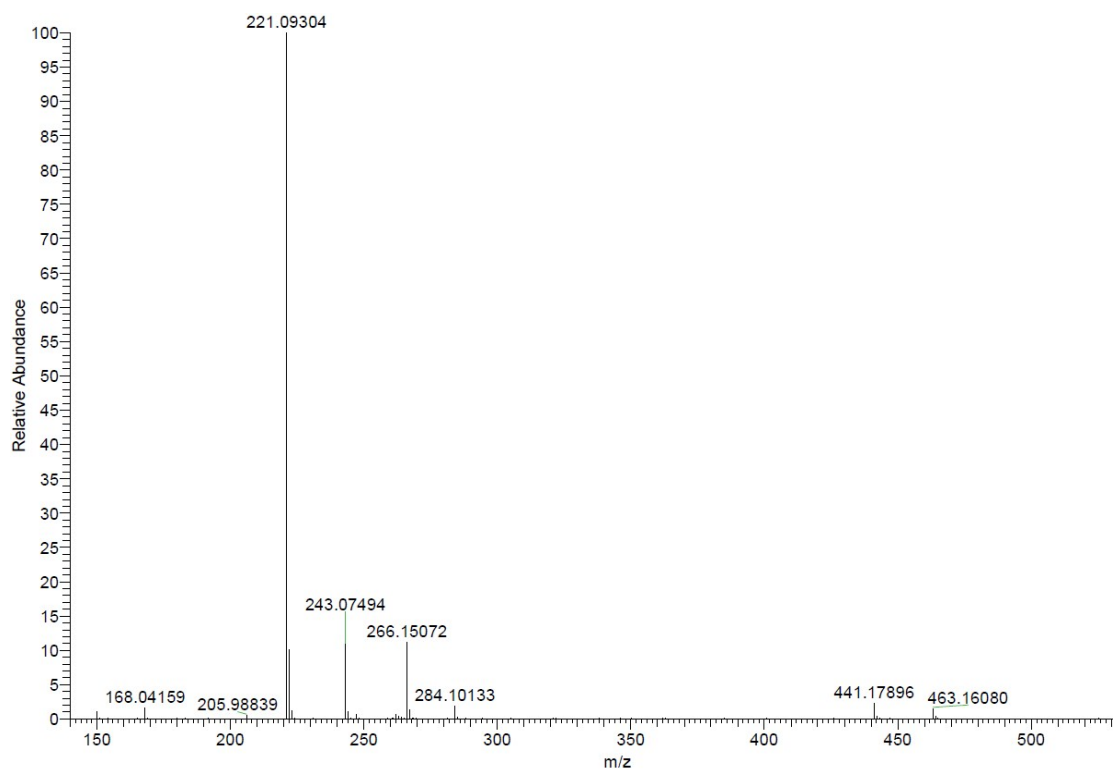

Fig.S 56 HRMS of compound **3n**

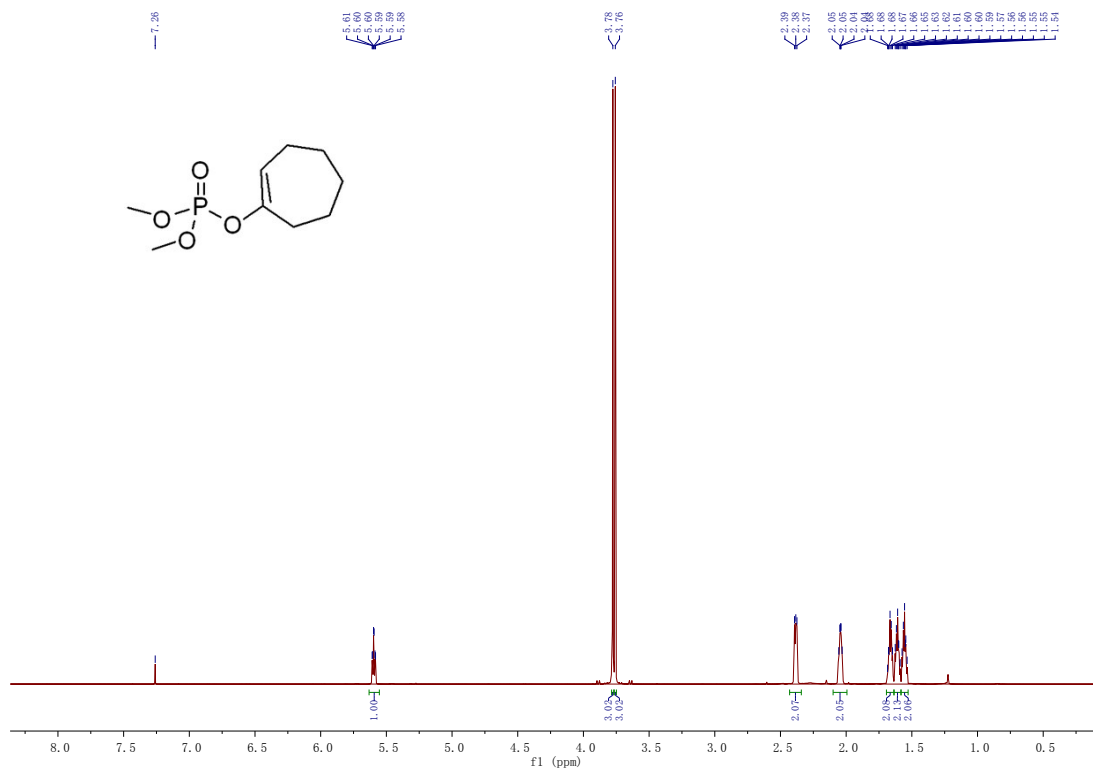

Fig.S 57 <sup>1</sup>H NMR of compound 30

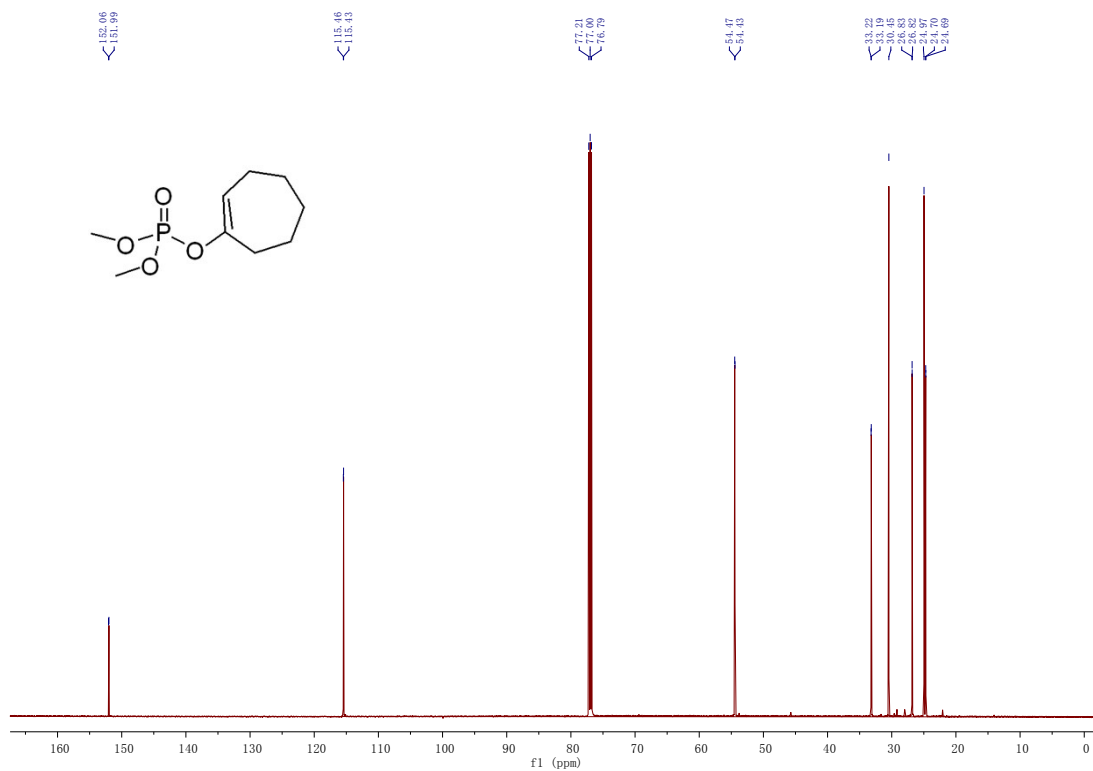

Fig.S 58 <sup>13</sup>C NMR of compound 30

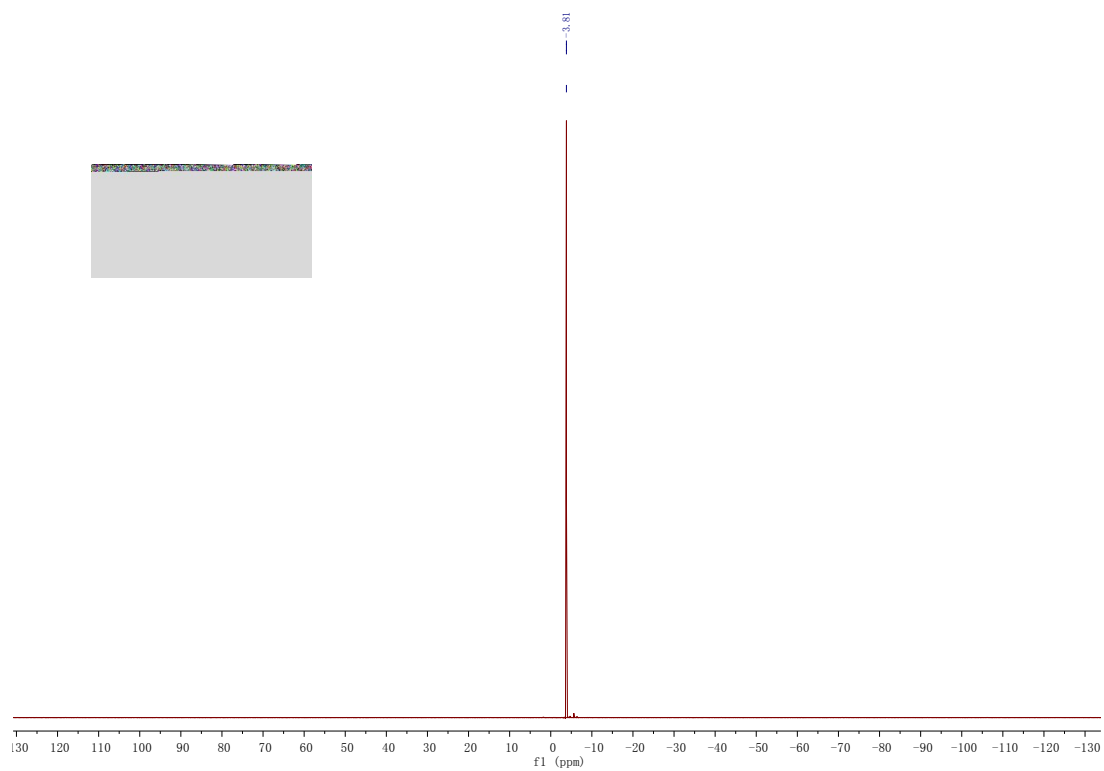

Fig.S 59  $^{31}\text{P}$  NMR of compound **3o**

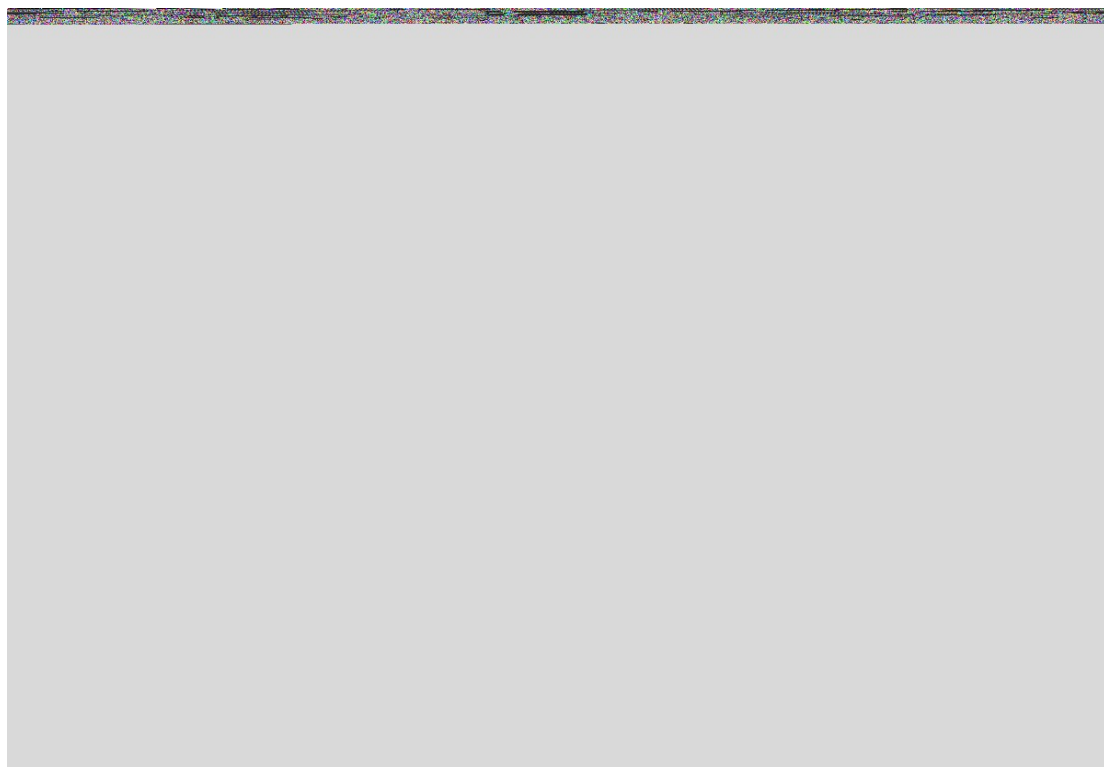

Fig.S 60 HRMS of compound **3o**



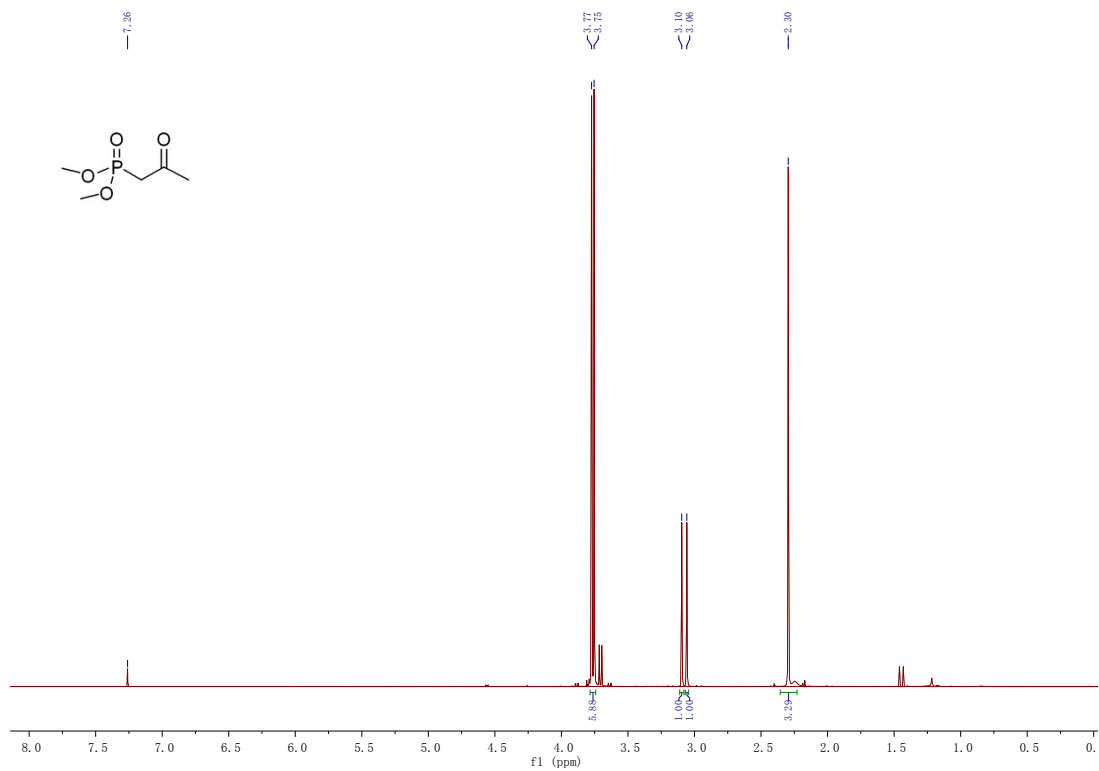

Fig.S 61 <sup>1</sup>H NMR of compound 4a

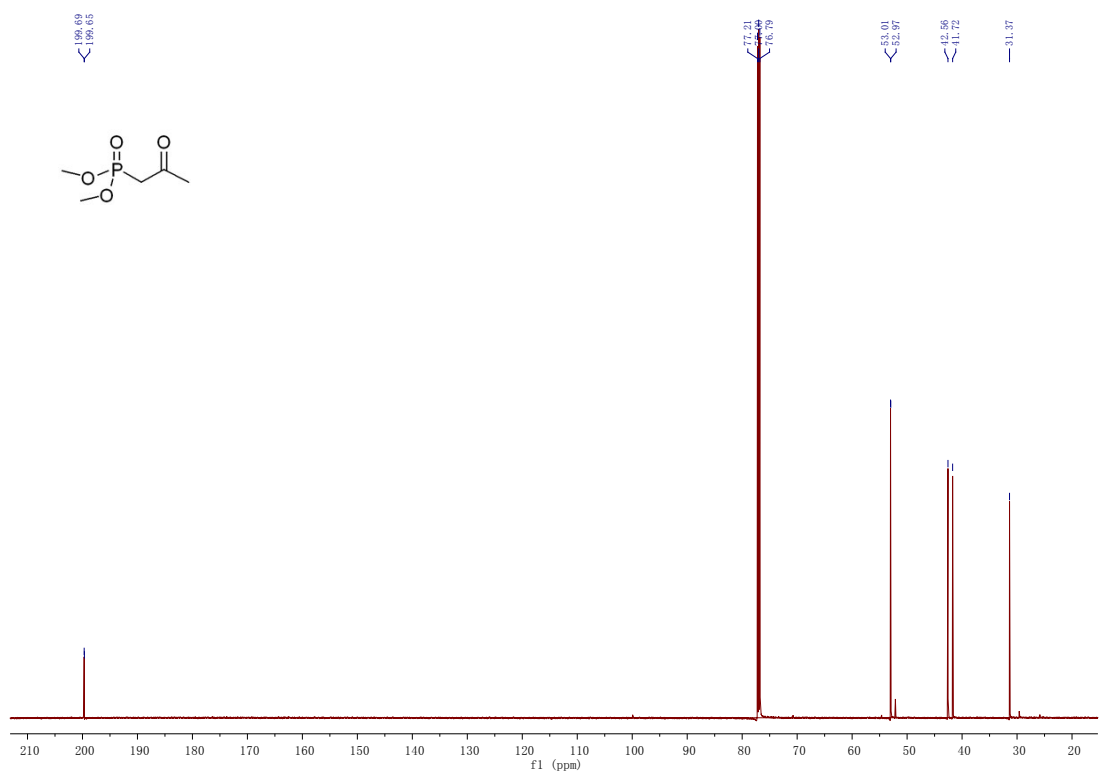

Fig.S 62 <sup>13</sup>C NMR of compound 4a

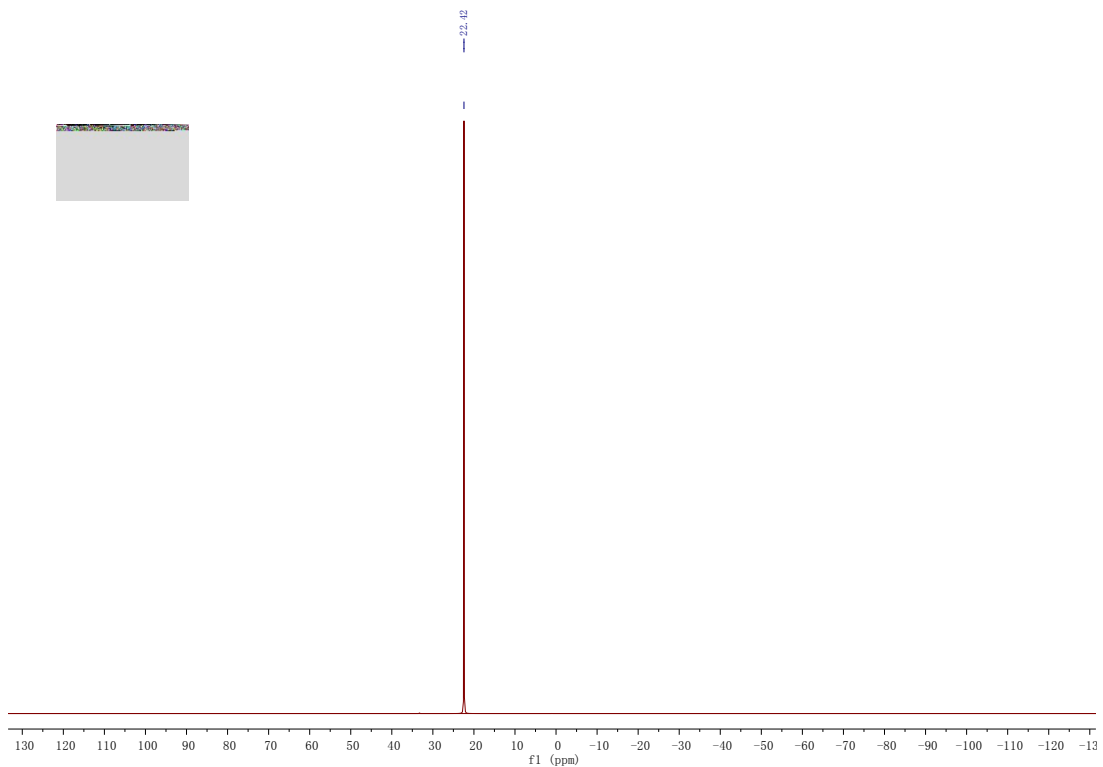

Fig.S 63  $^{31}\text{P}$  NMR of compound 4a

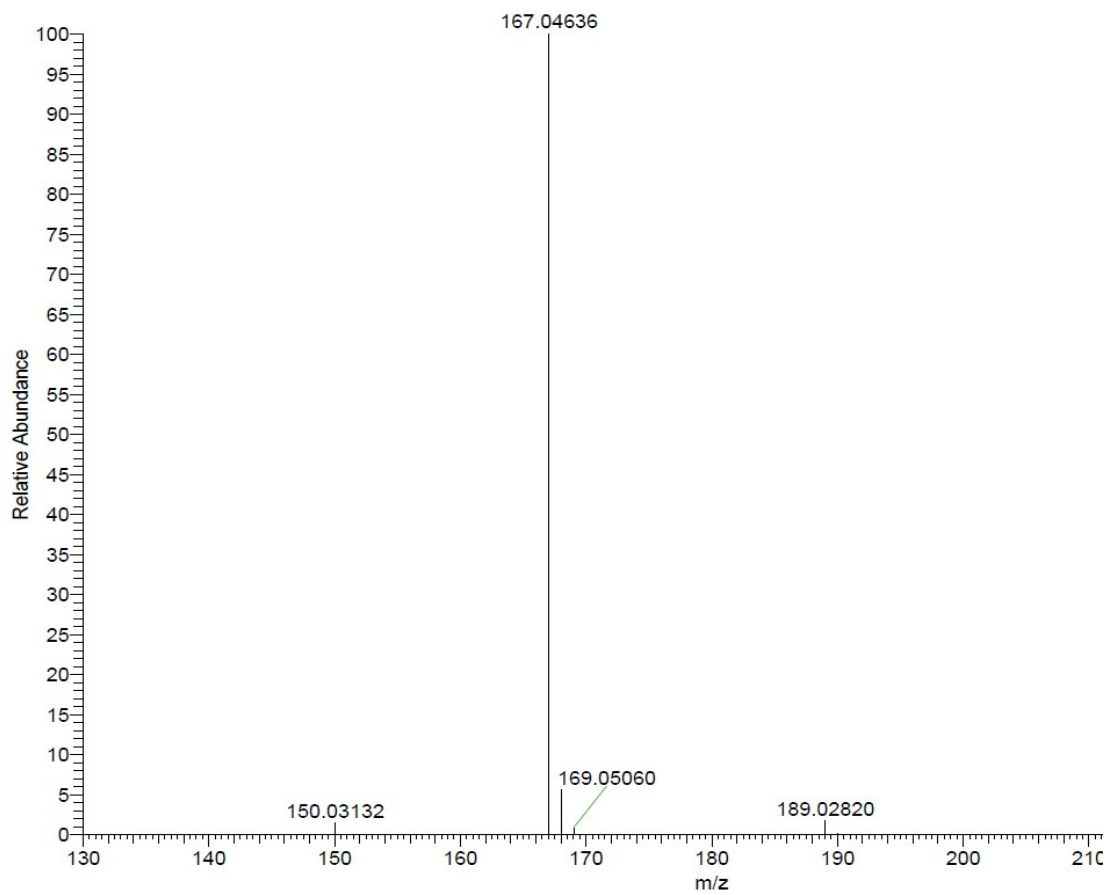

Fig.S 64 HRMS of compound 4a

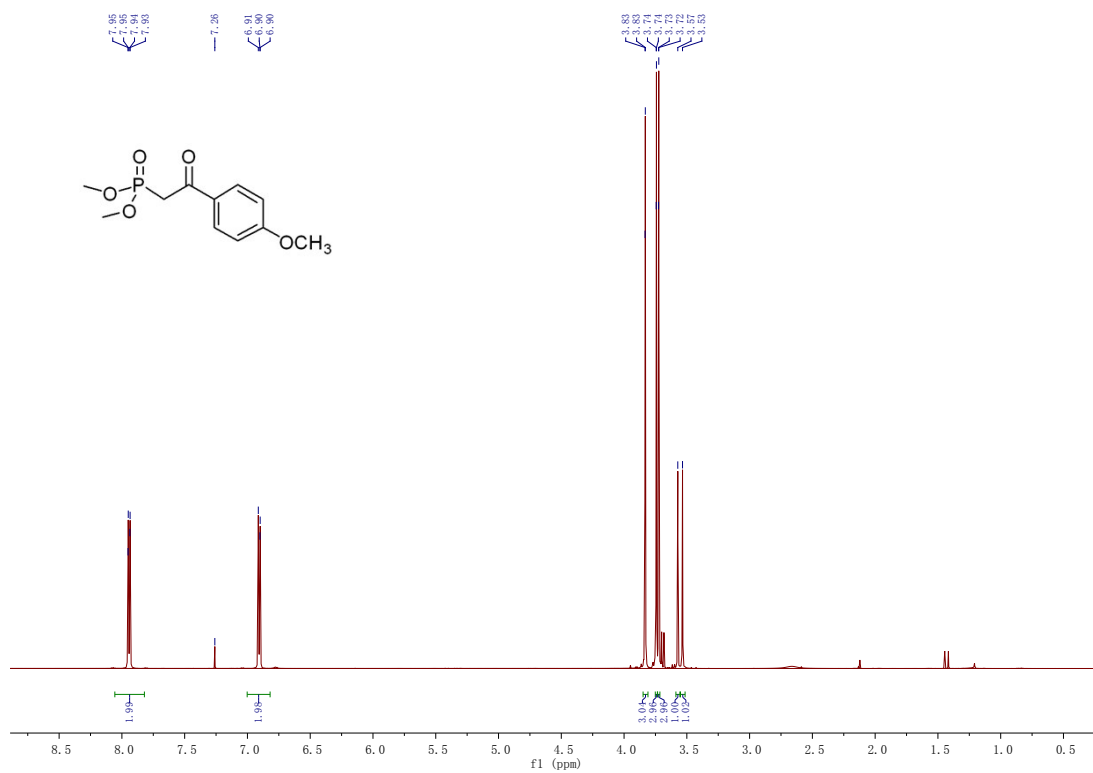

Fig.S 65 <sup>1</sup>H NMR of compound 4b

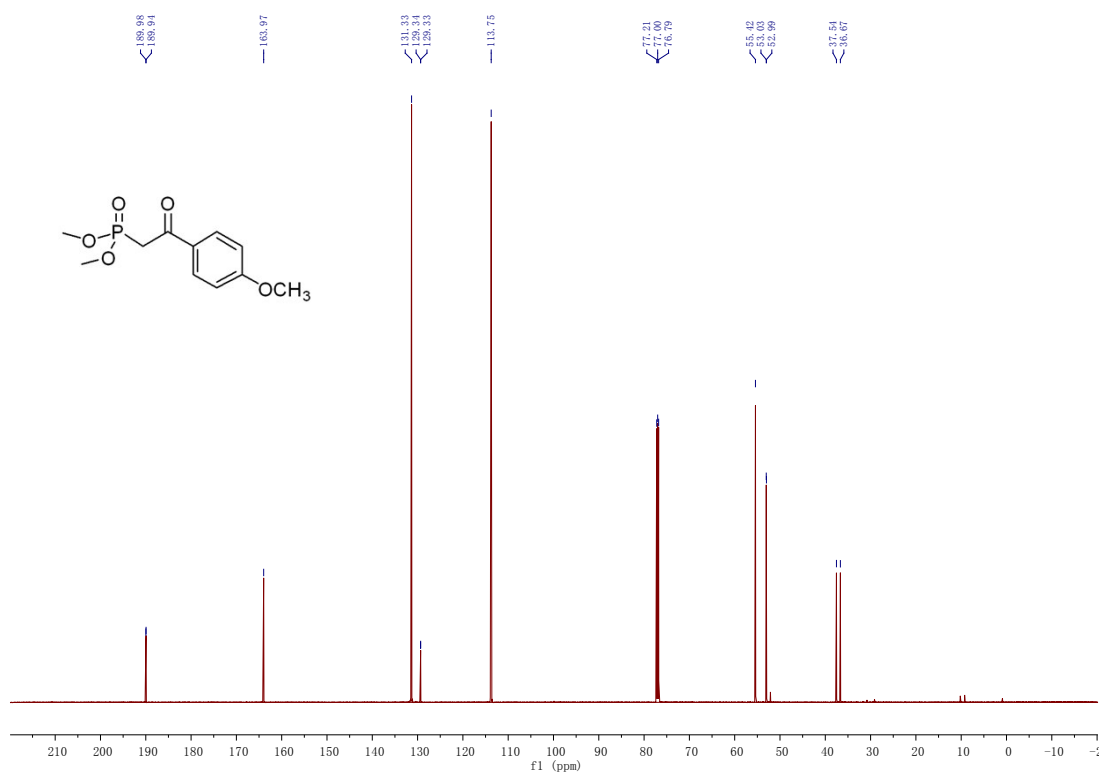

Fig.S 66 <sup>13</sup>C NMR of compound 4b

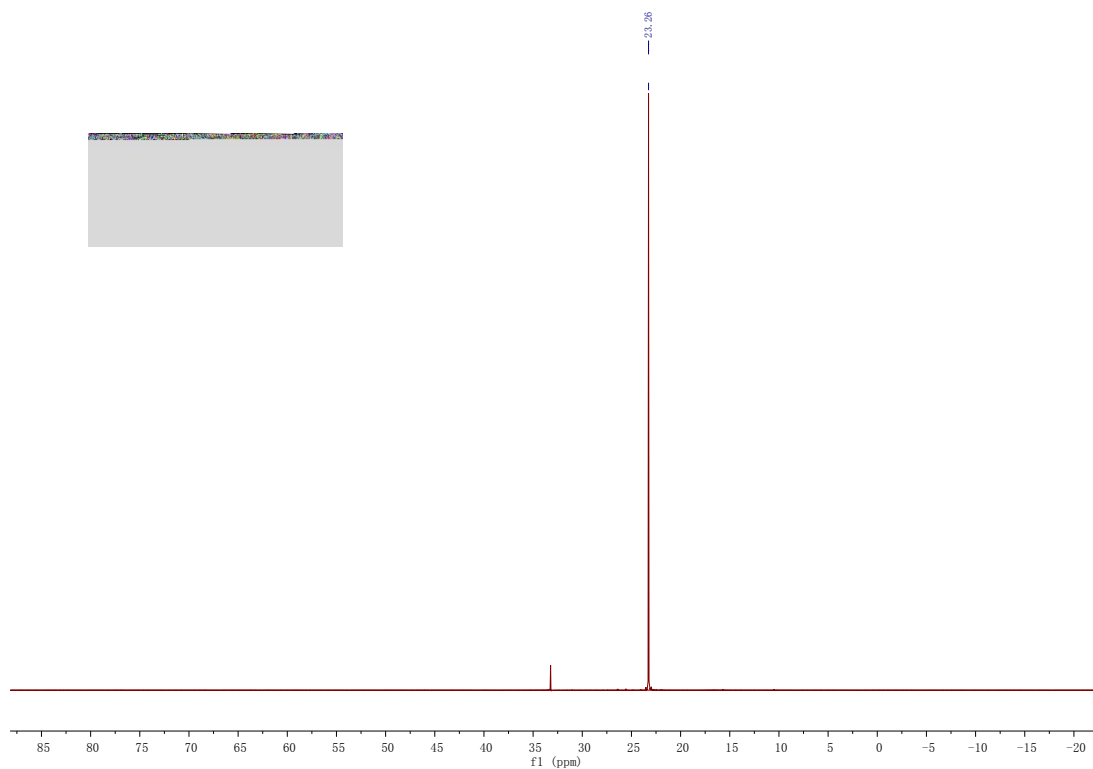

Fig.S 67  $^{31}\text{P}$  NMR of compound **4b**

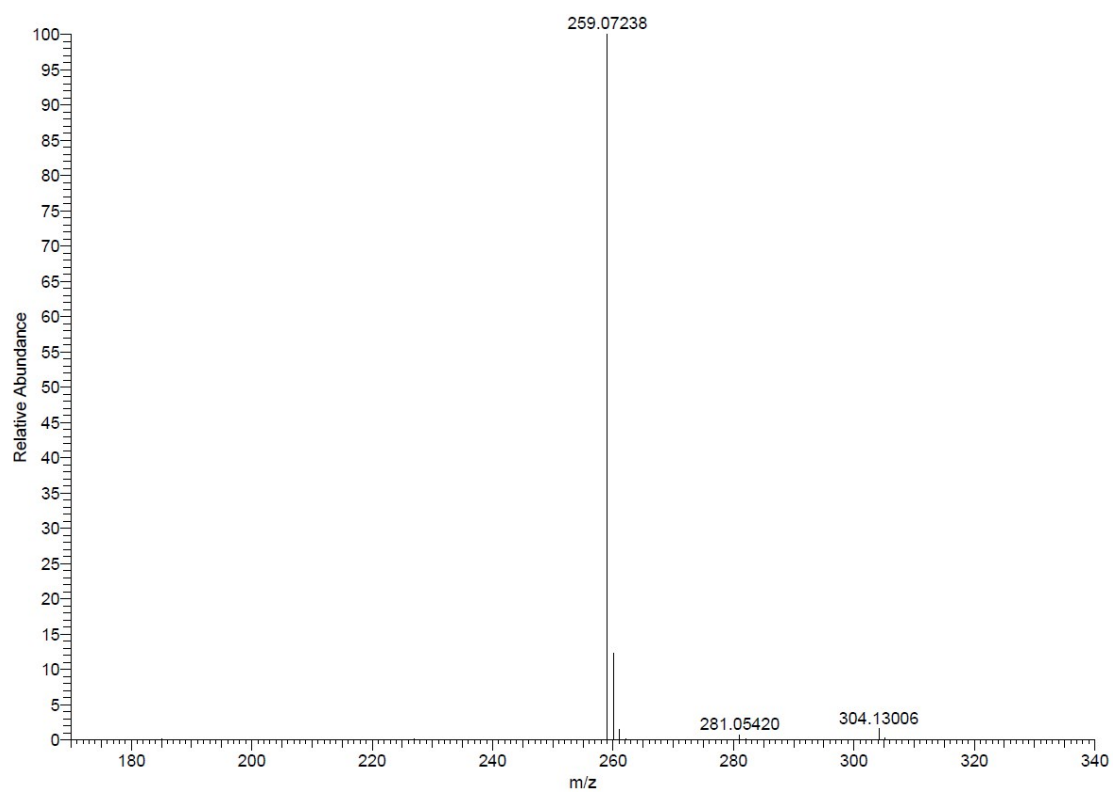

Fig.S 68 HRMS of compound **4b**

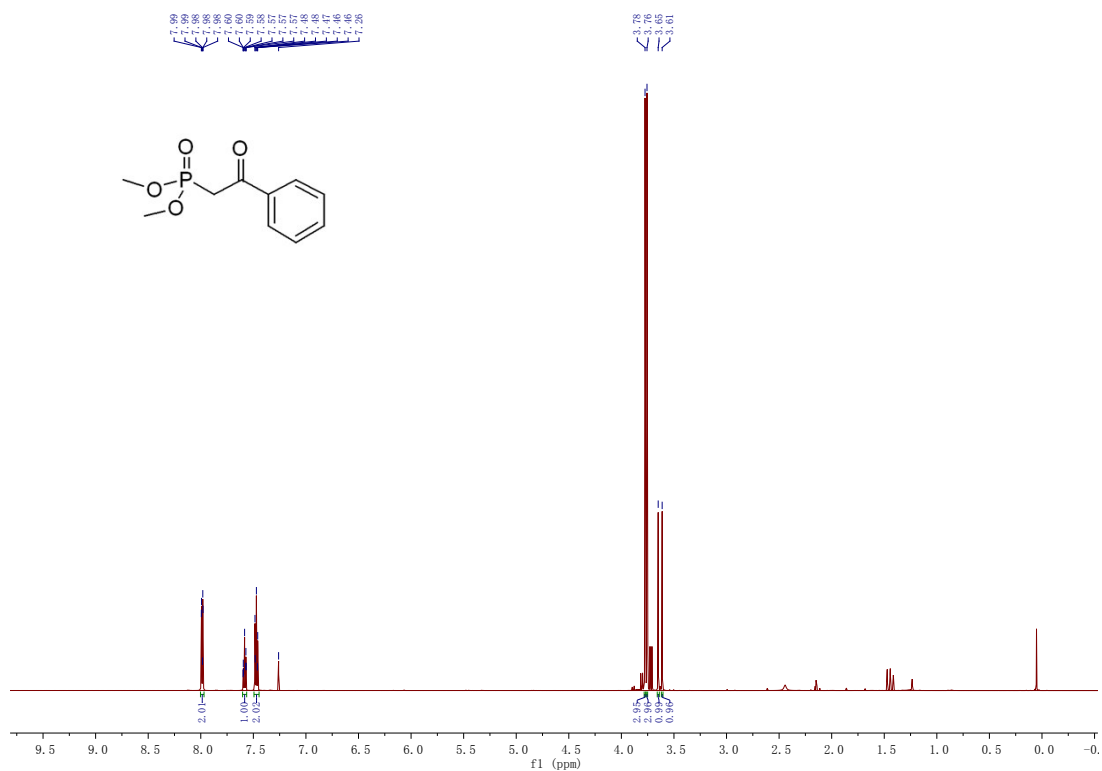

Fig.S 69 <sup>1</sup>H NMR of compound 4c

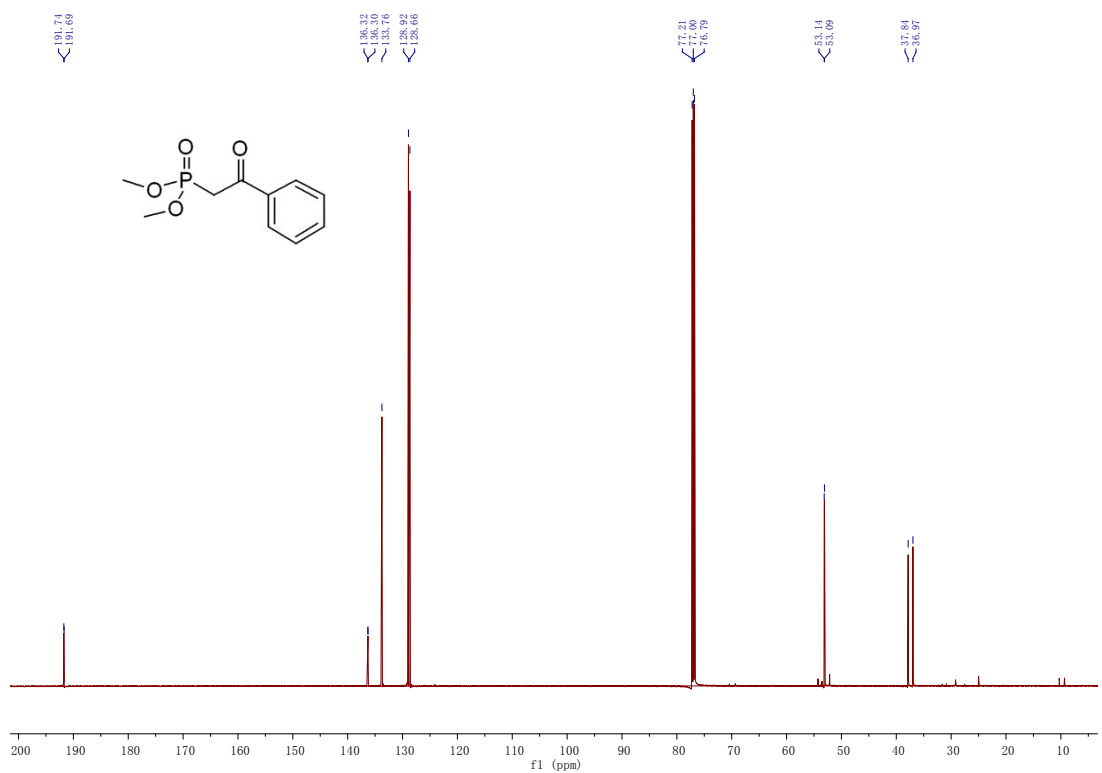

Fig.S 70 <sup>13</sup>C NMR of compound 4c

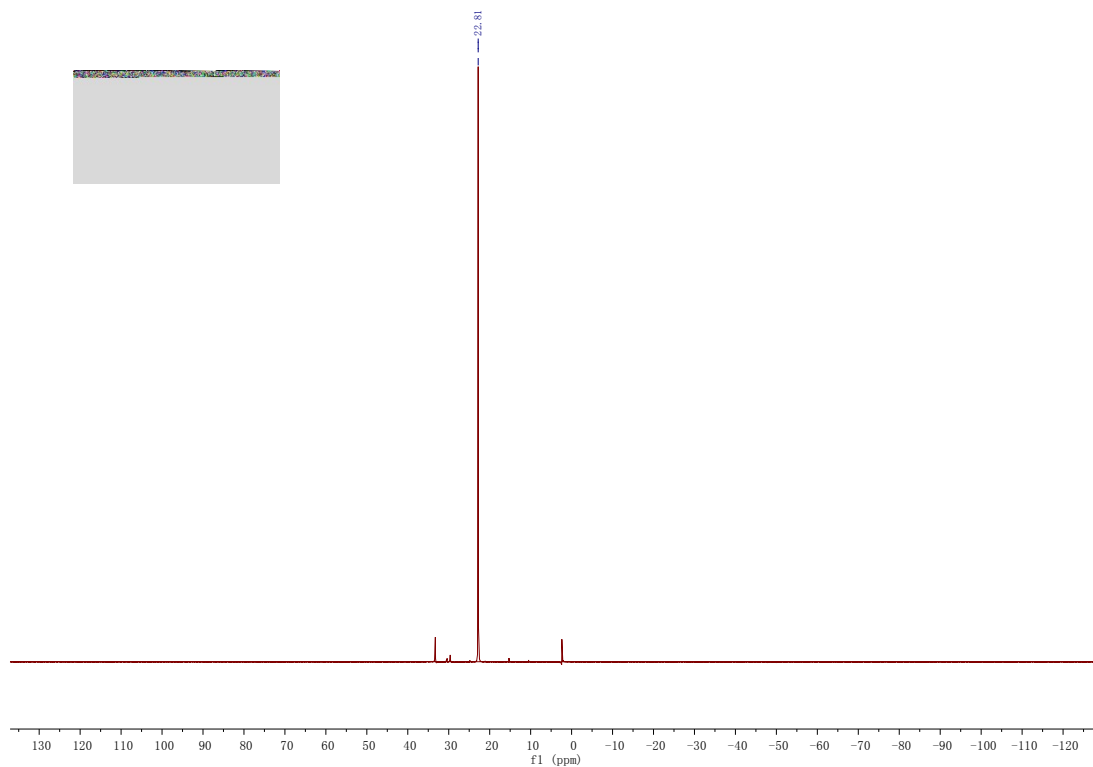

Fig.S 71  $^{31}\text{P}$  NMR of compound **4c**

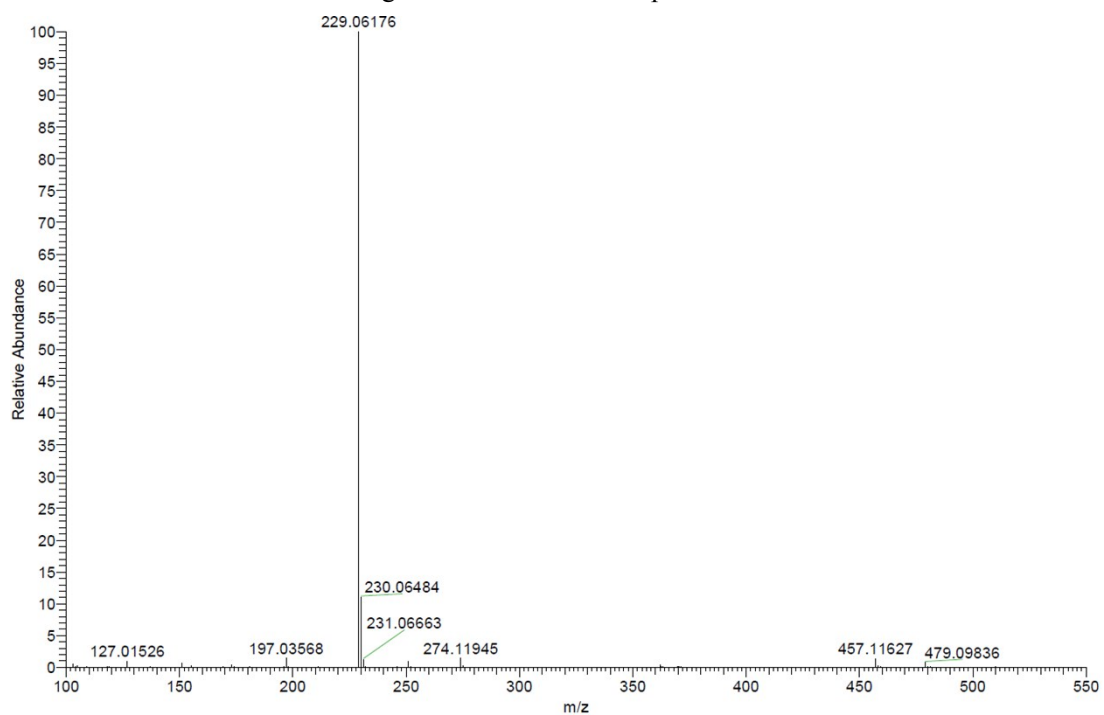

Fig.S 72 HRMS of compound **4c**

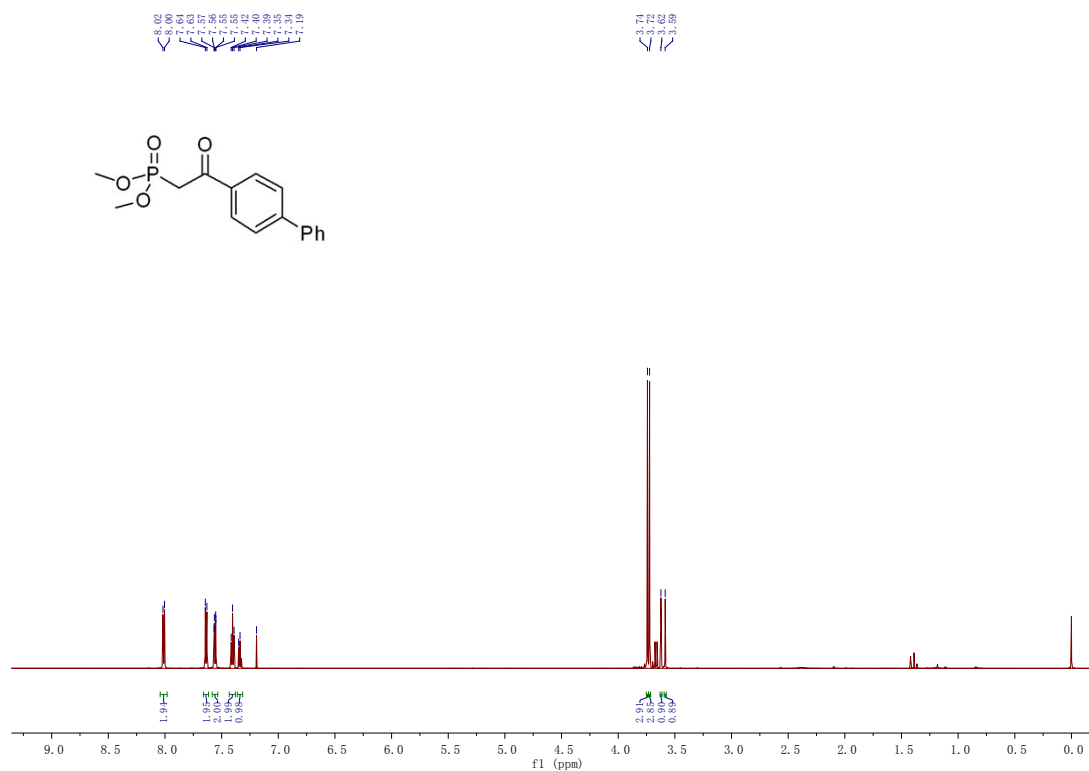

Fig.S 73  $^1\text{H}$  NMR of compound **4d**

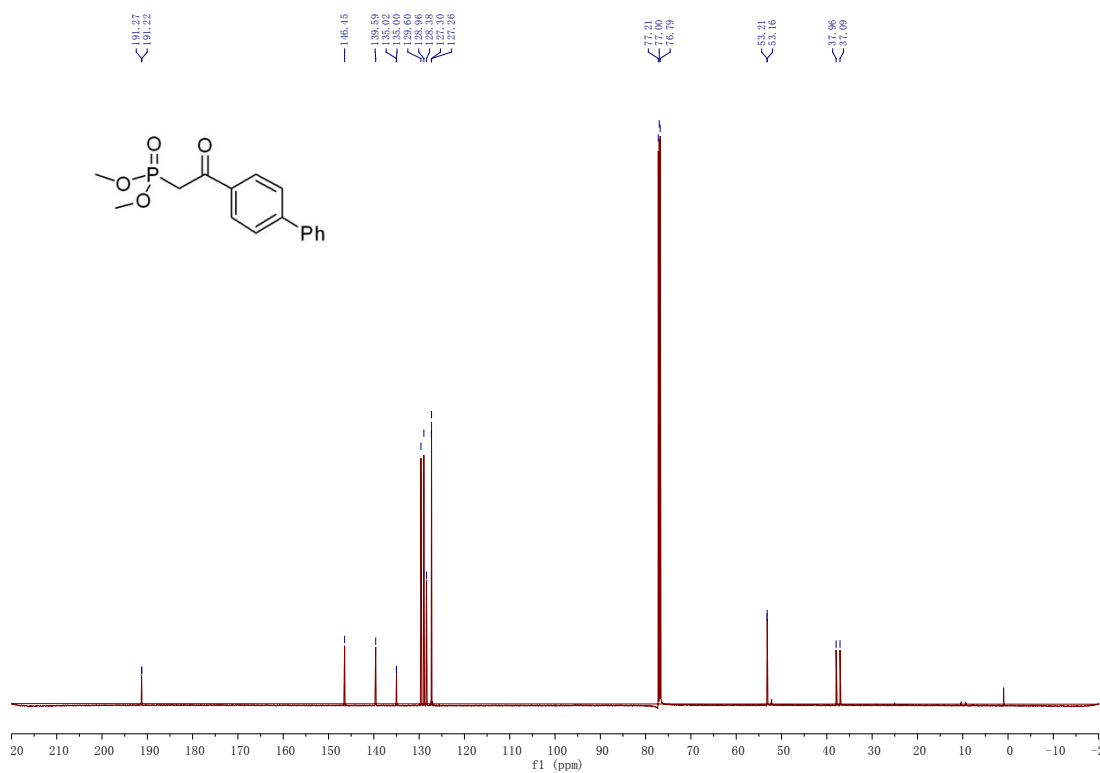

Fig.S 74  $^{13}\text{C}$  NMR of compound **4d**

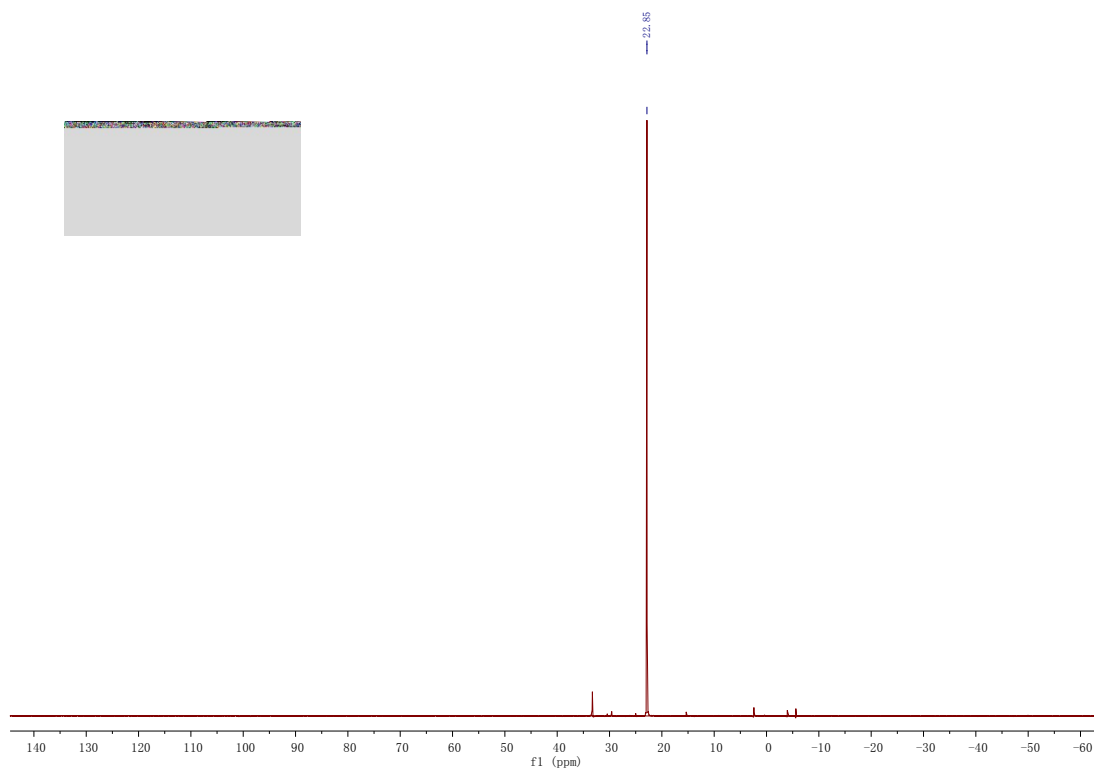

Fig.S 75  $^{31}\text{P}$  NMR of compound **4d**

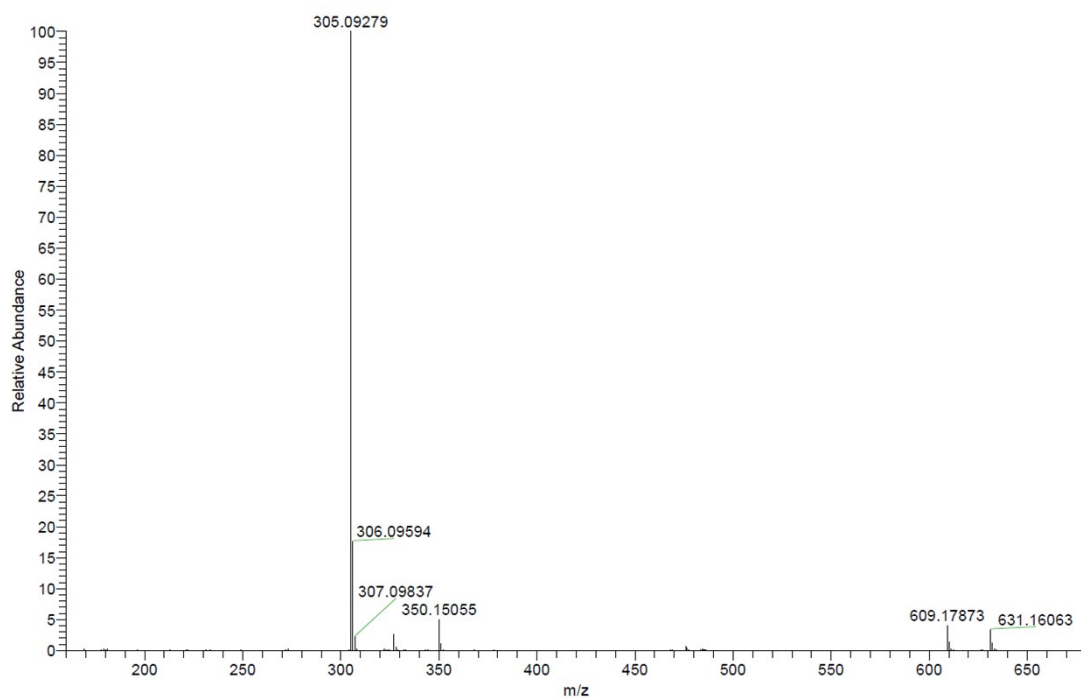

Fig.S 76 HRMS of compound **4d**



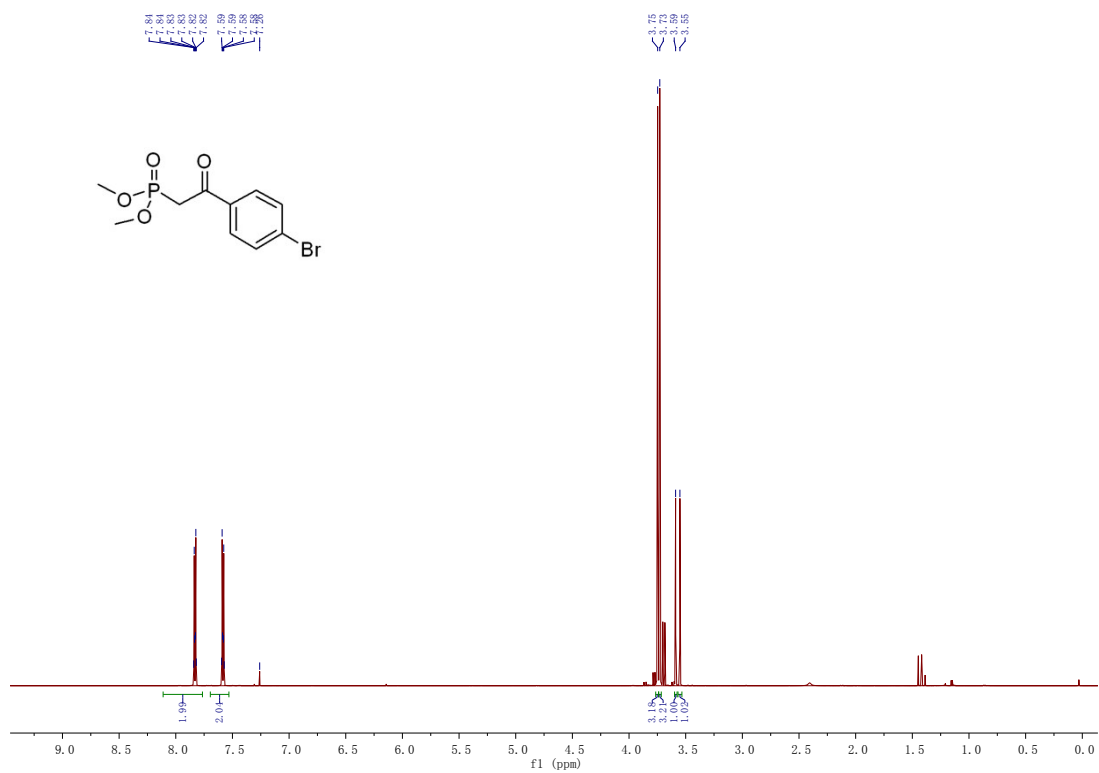

Fig.S 77 <sup>1</sup>H NMR of compound 4e

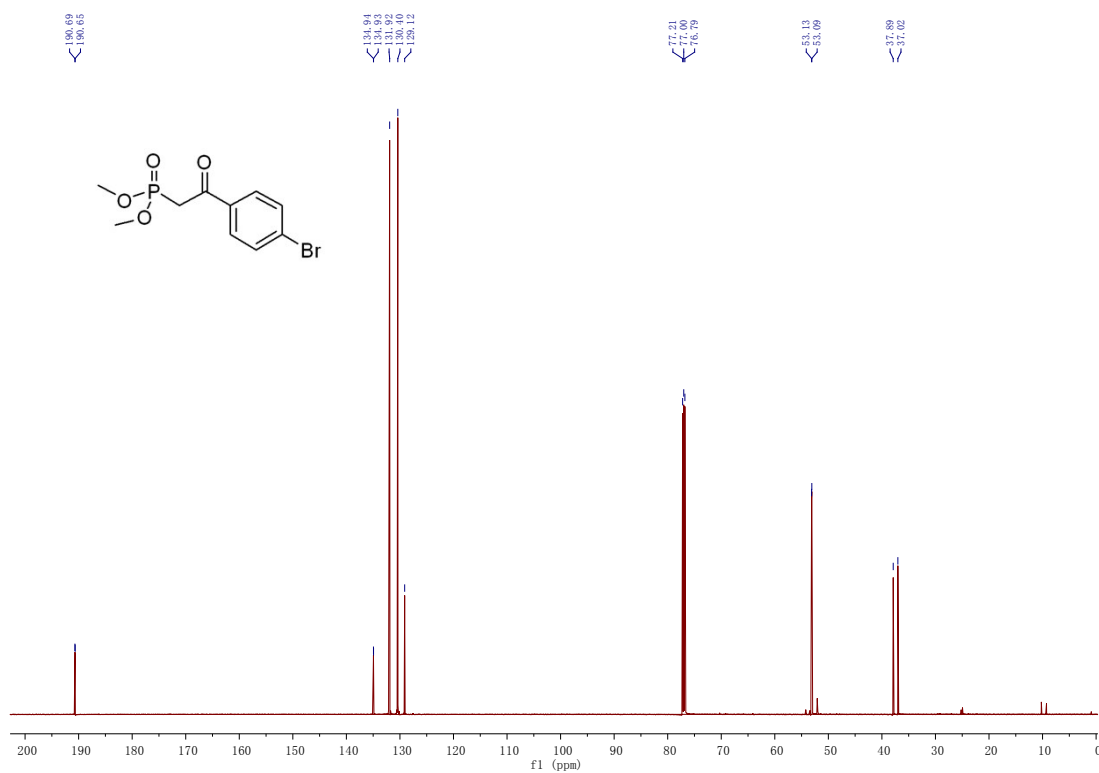

Fig.S 78 <sup>13</sup>C NMR of compound 4e

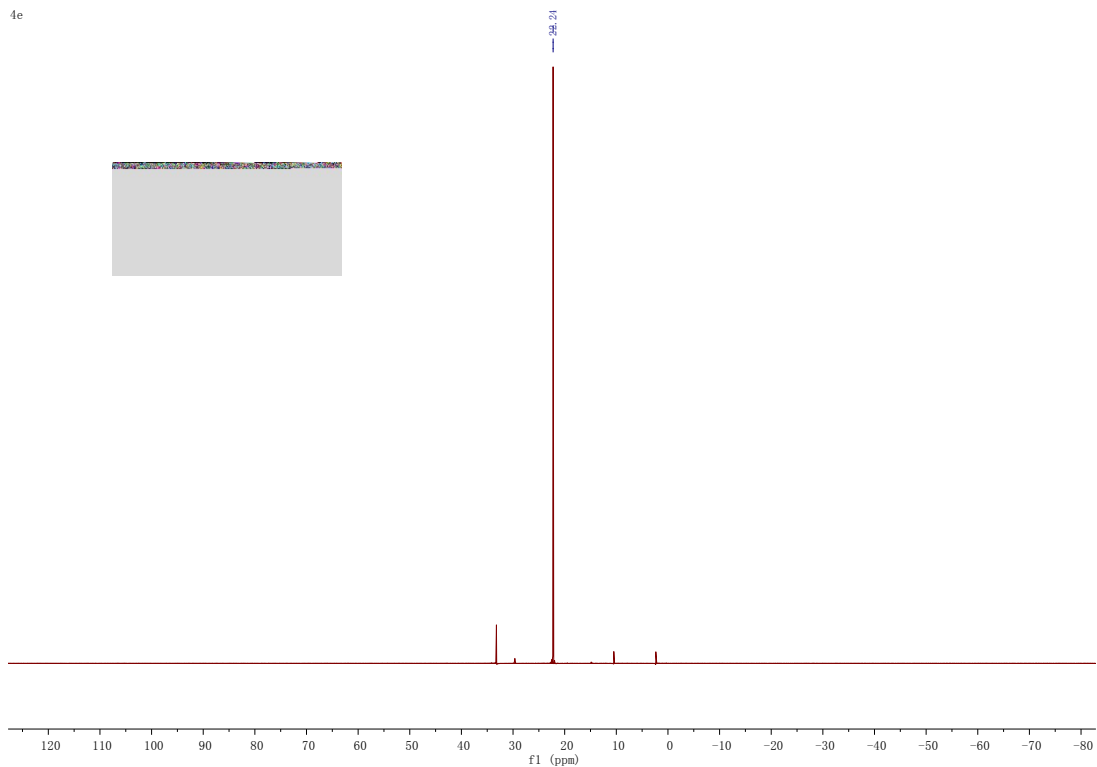

Fig.S 79  $^{31}\text{P}$  NMR of compound 4e

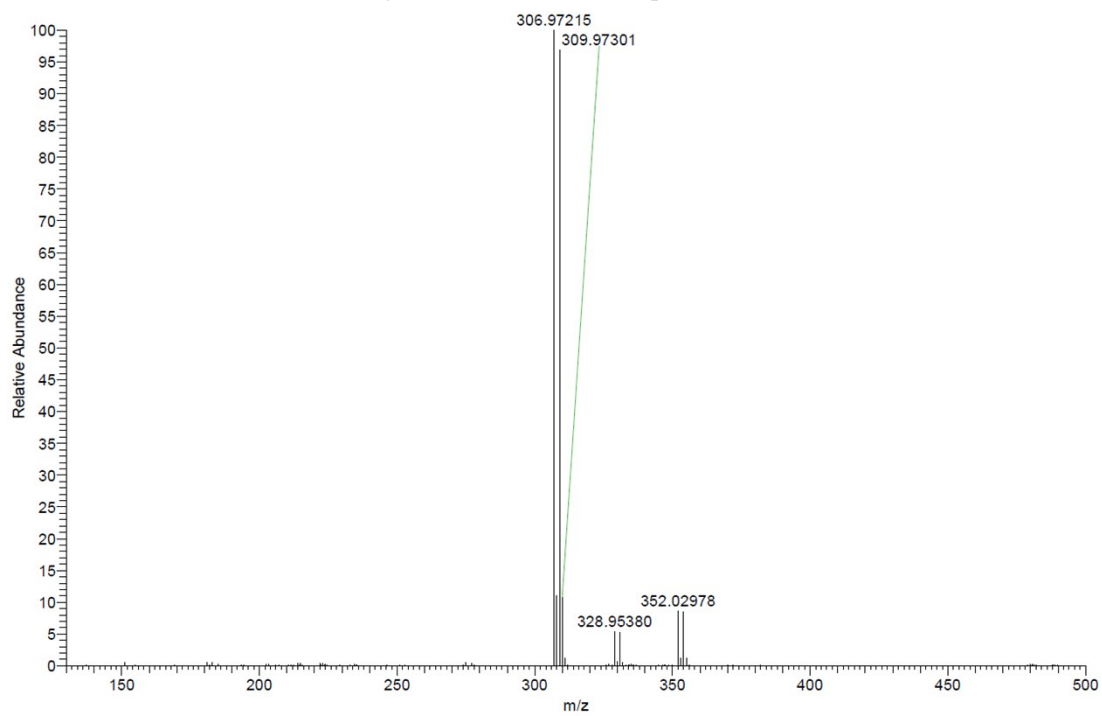

Fig.S 80 HRMS of compound 4e

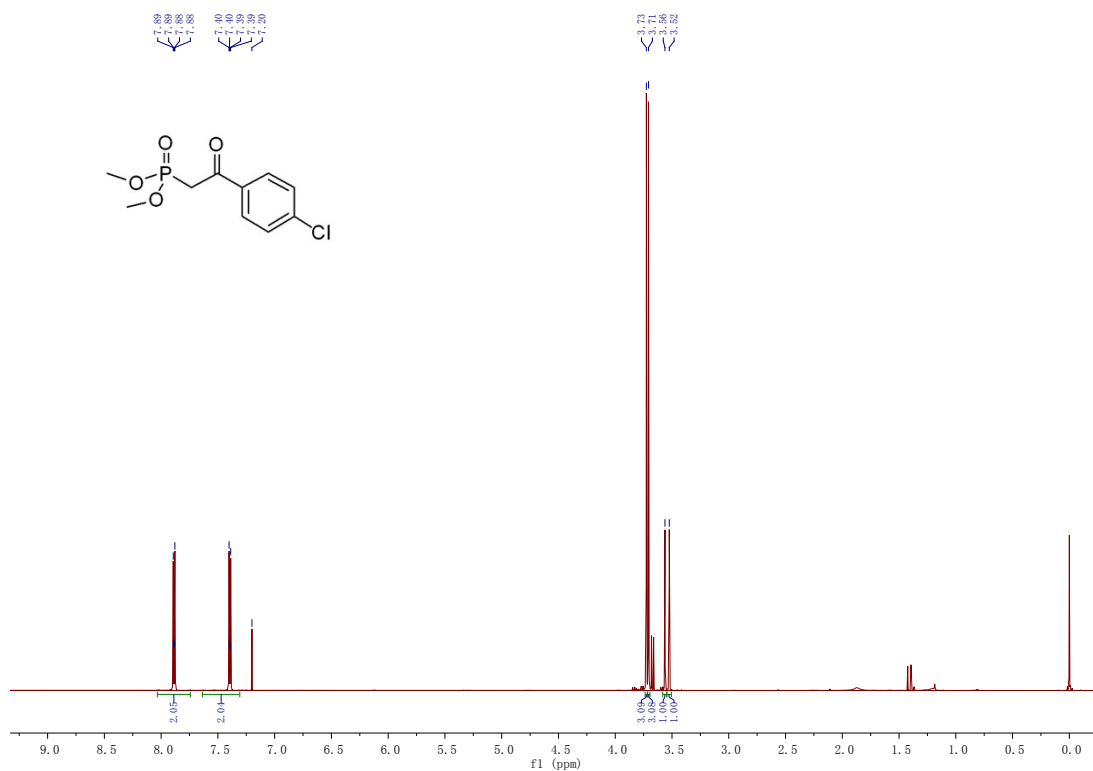

Fig.S 81 <sup>1</sup>H NMR of compound 4f

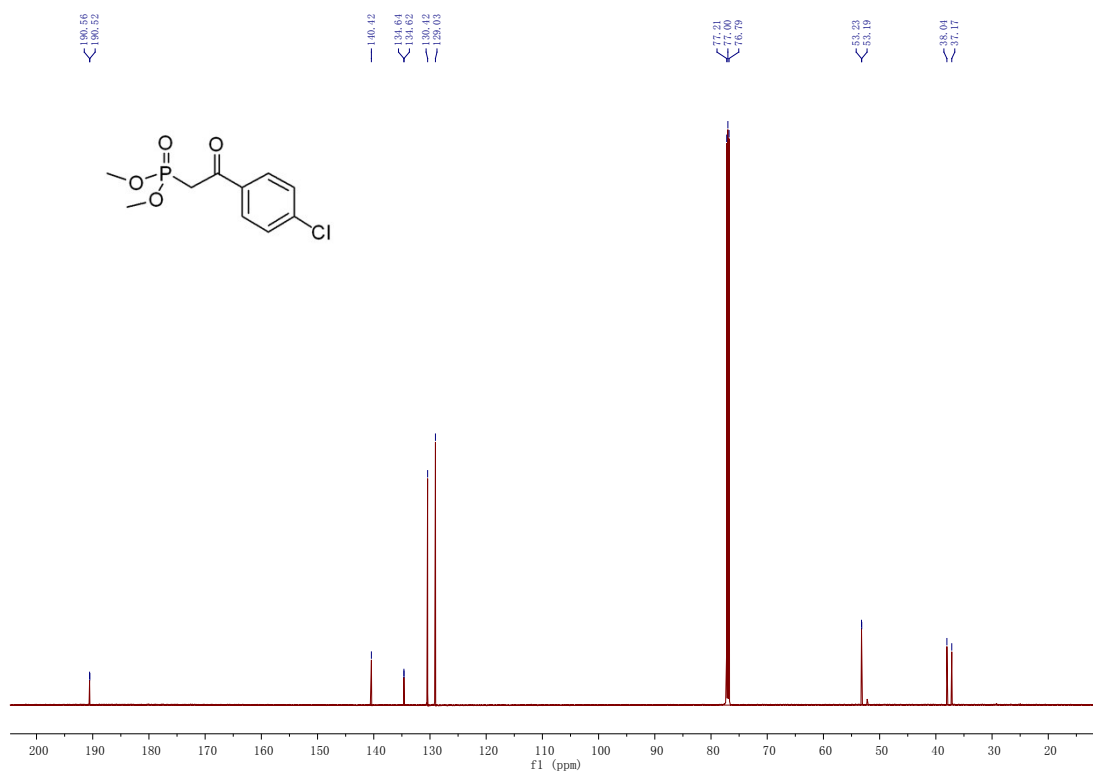

Fig.S 82 <sup>13</sup>C NMR of compound 4f

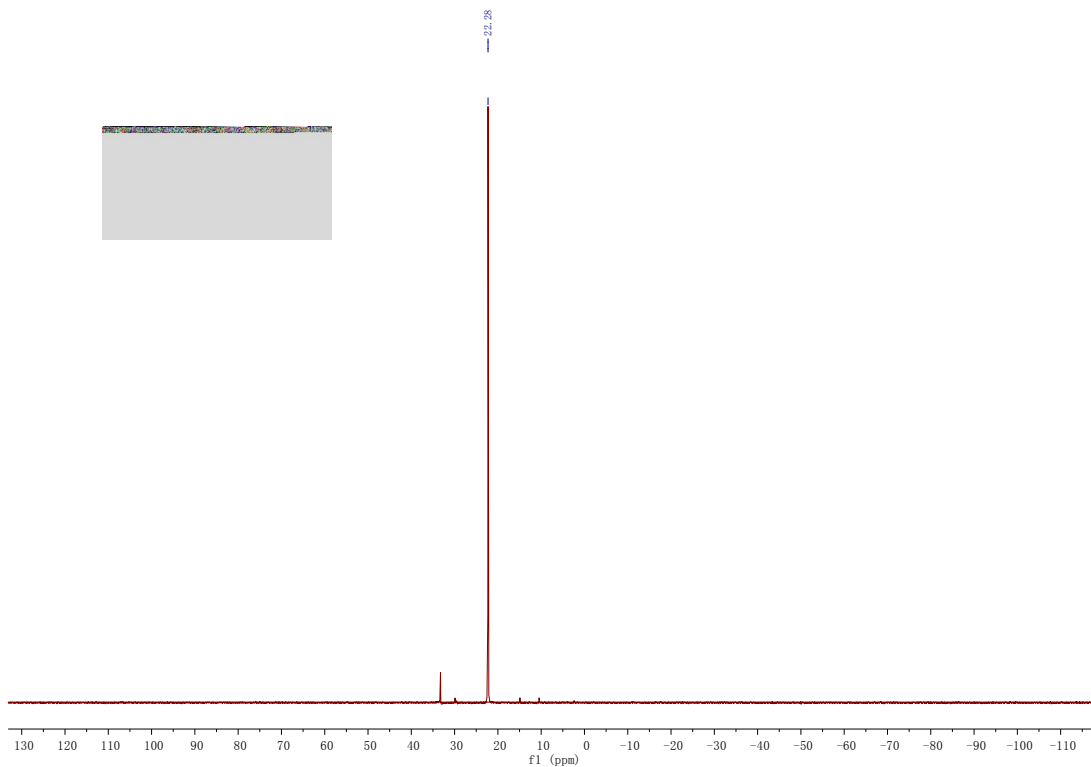

Fig.S 83  $^{31}\text{P}$  NMR of compound **4f**

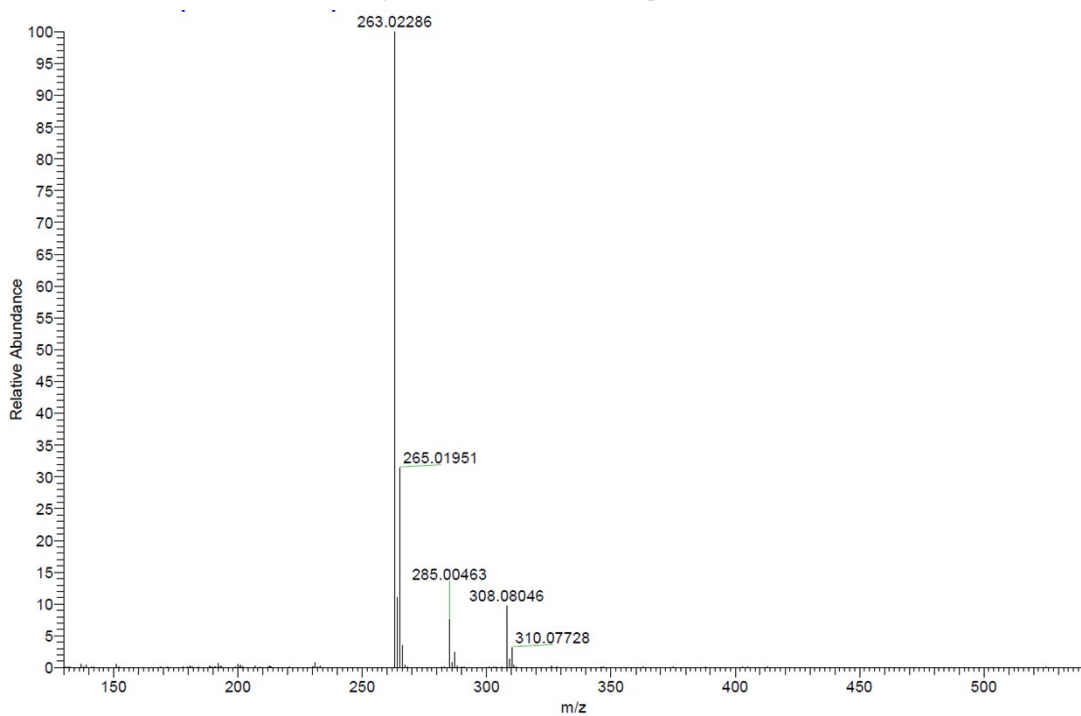

Fig.S 84 HRMS of compound **4f**

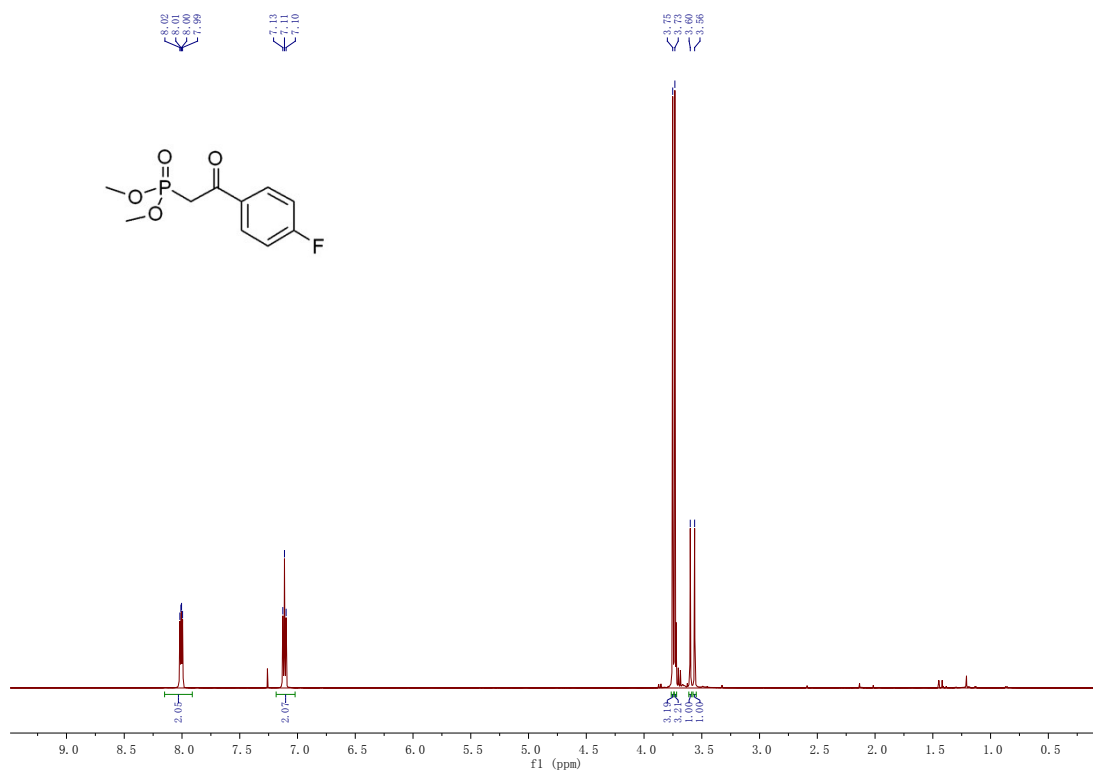

Fig.S 85 <sup>1</sup>H NMR of compound 4g

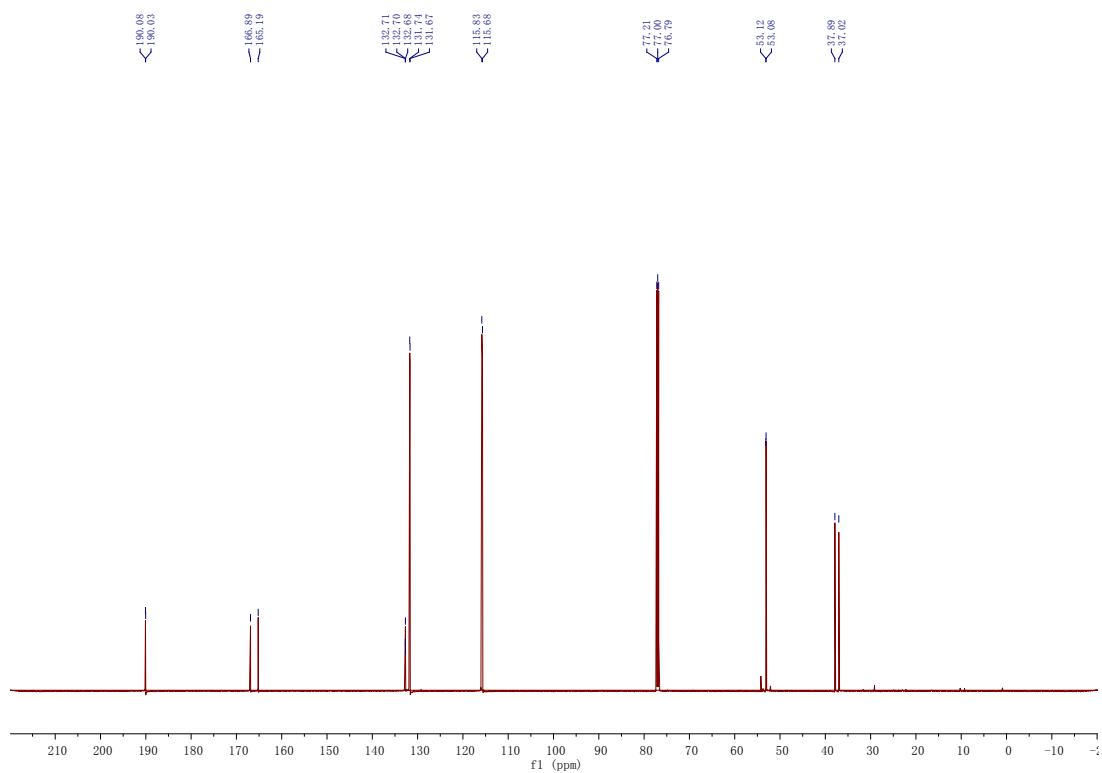

Fig.S 86 <sup>13</sup>C NMR of compound 4g

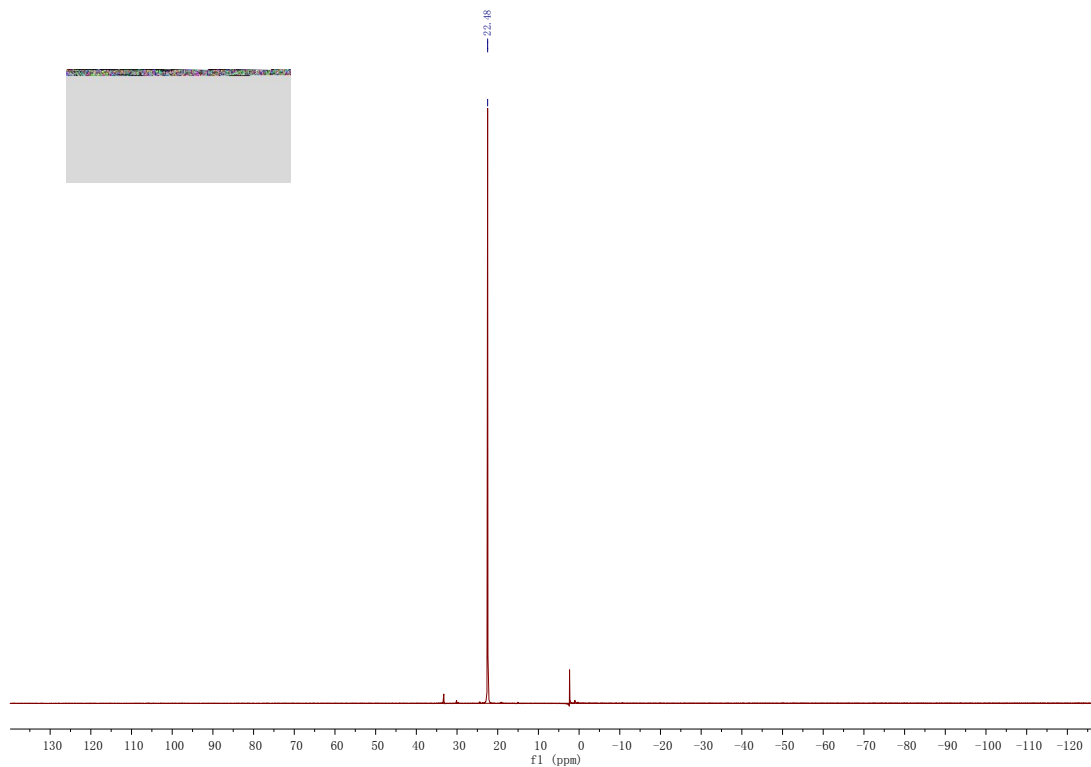

Fig.S 87  $^{31}\text{P}$  NMR of compound **4g**

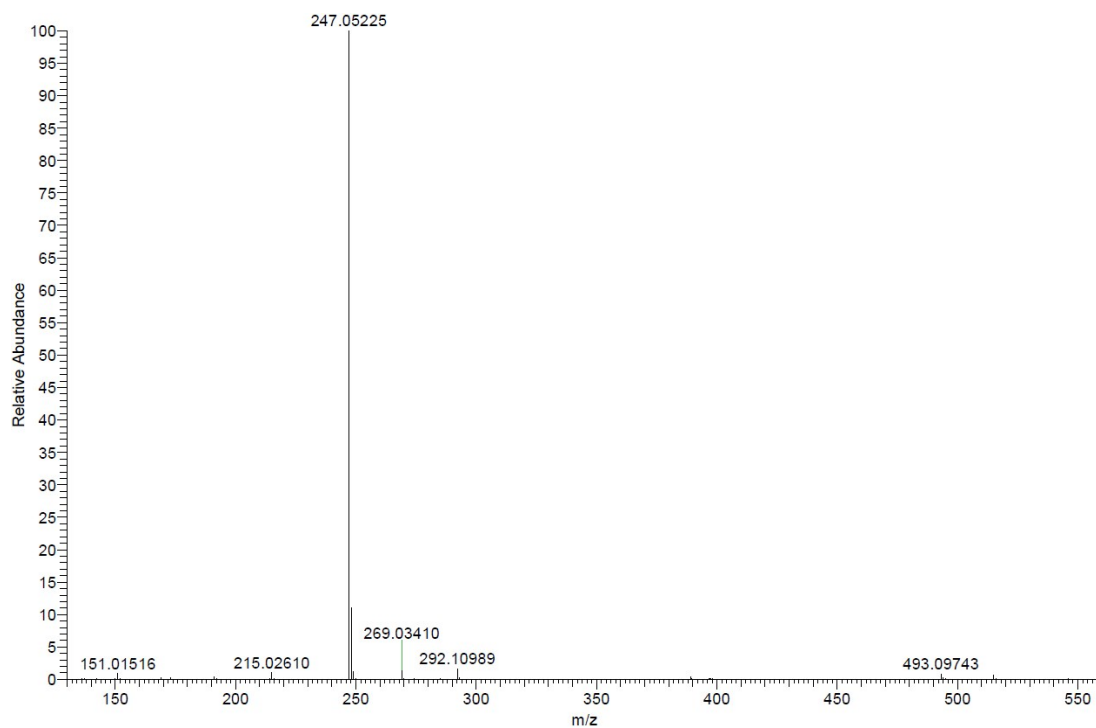

Fig.S 88 HRMS of compound **4g**



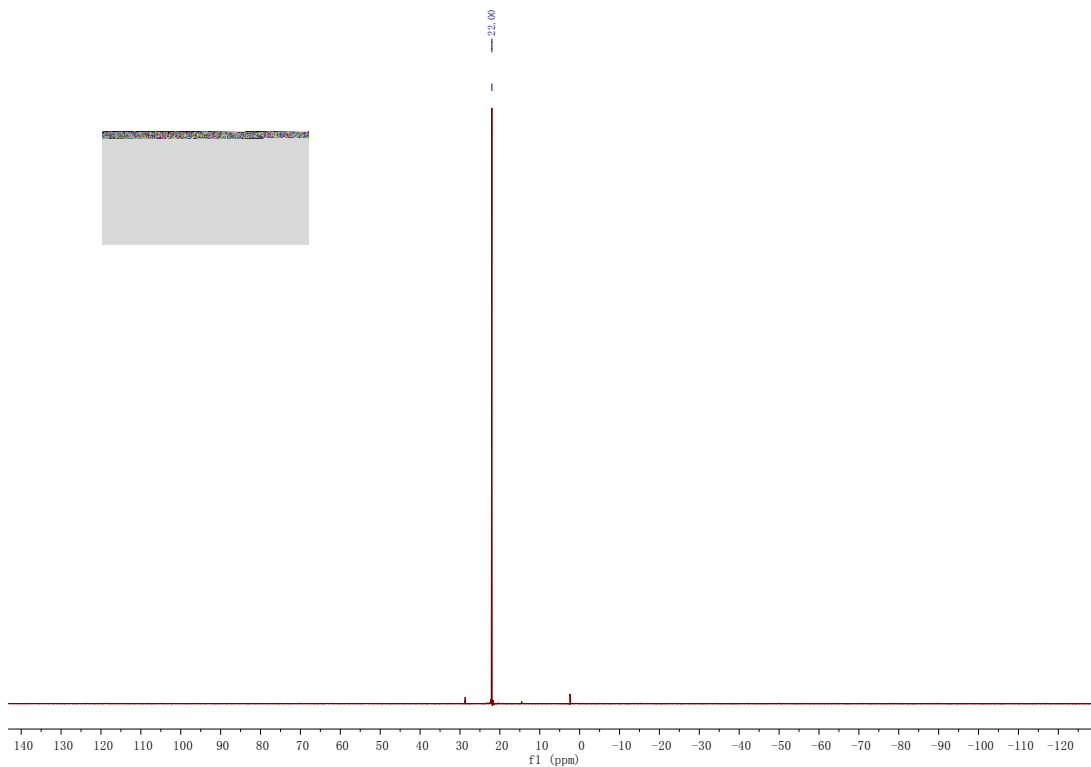

Fig.S 91  $^{31}\text{P}$  NMR of compound **4h**

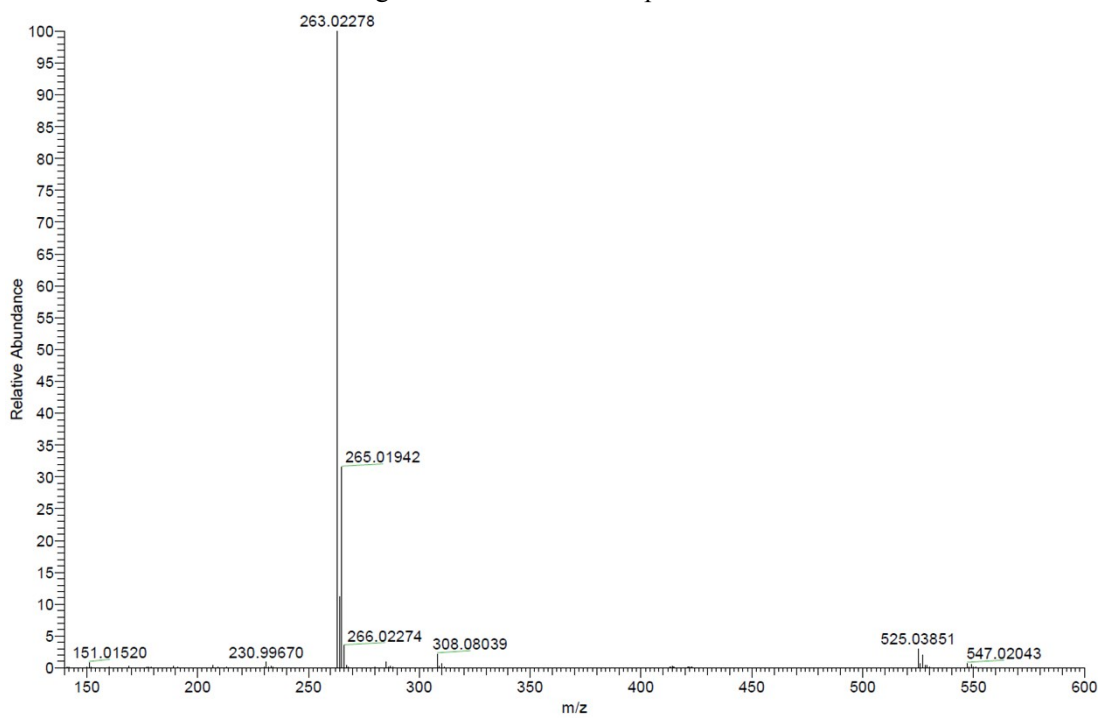

Fig.S 92 HRMS of compound **4h**



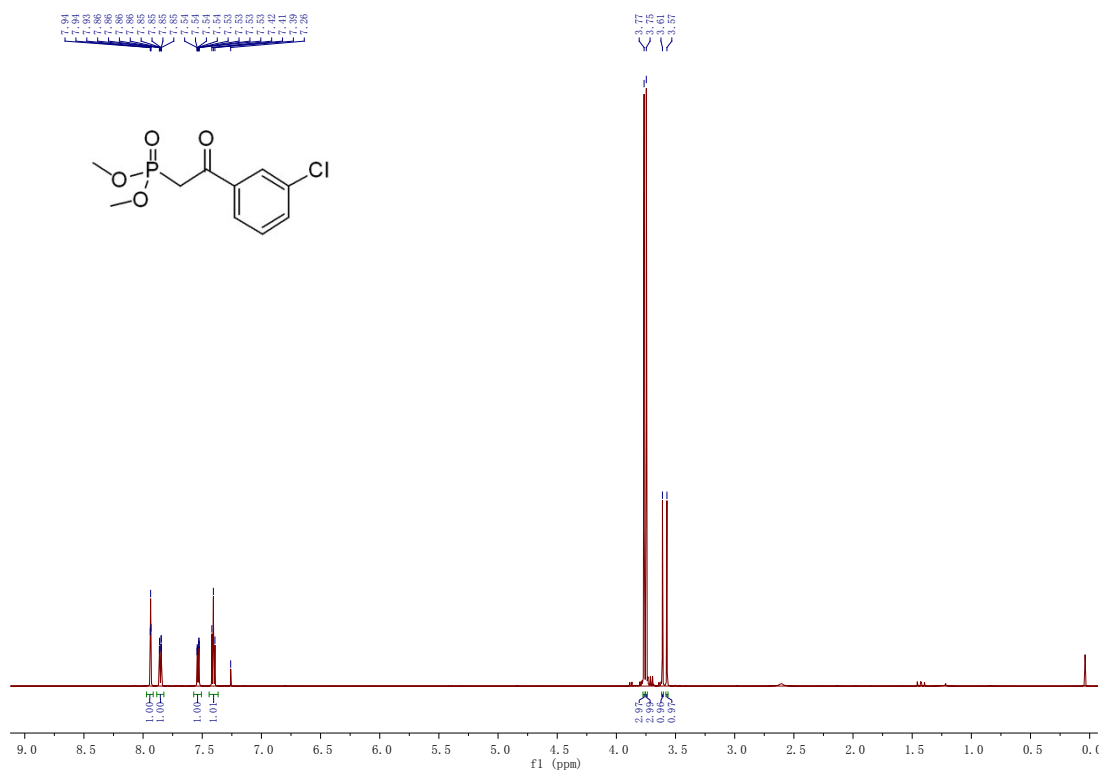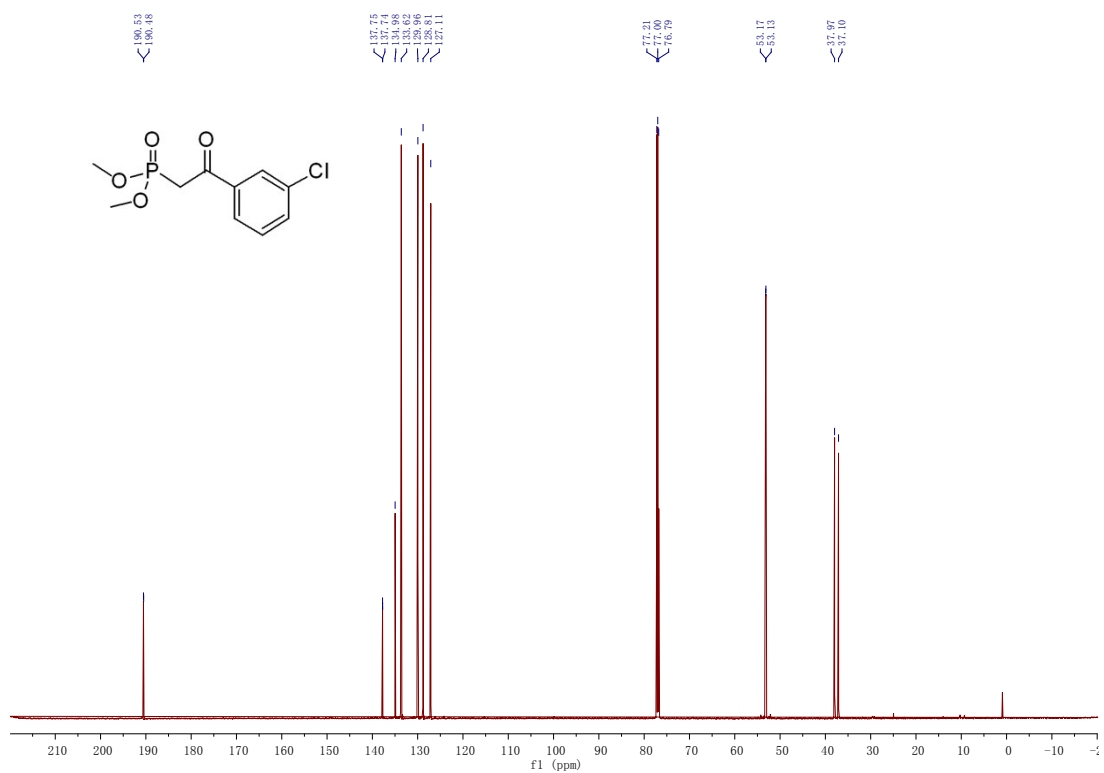

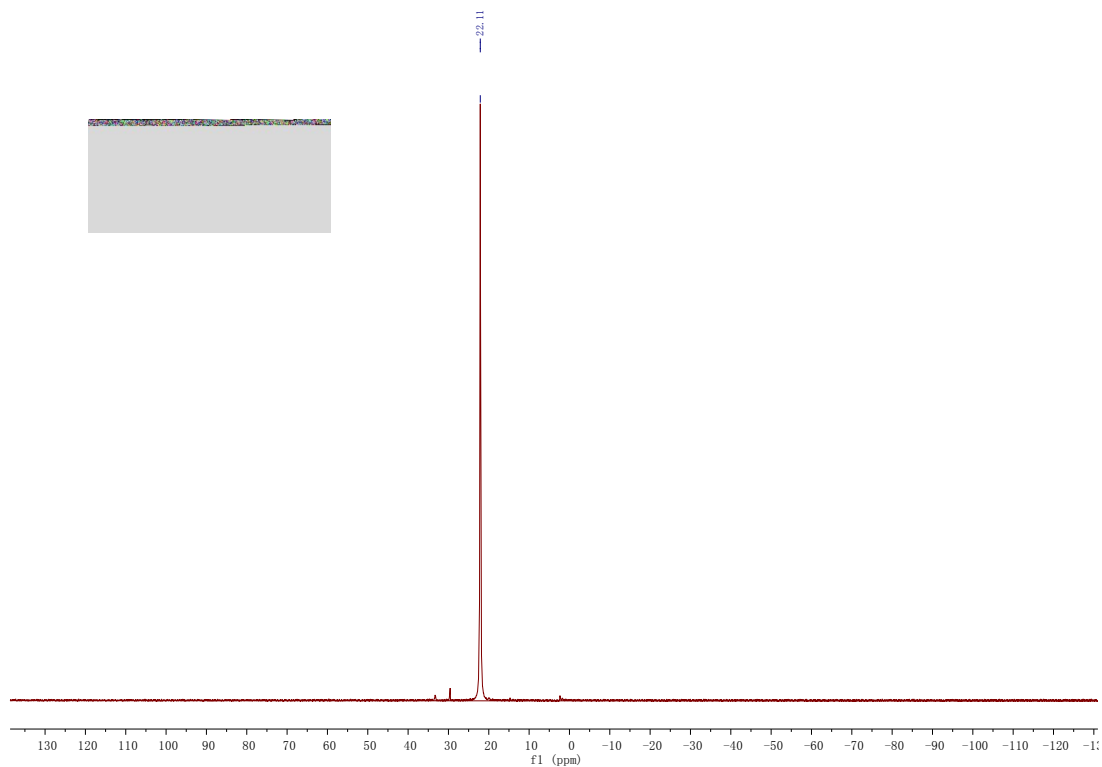

Fig.S 95  $^{31}\text{P}$  NMR of compound **4i**

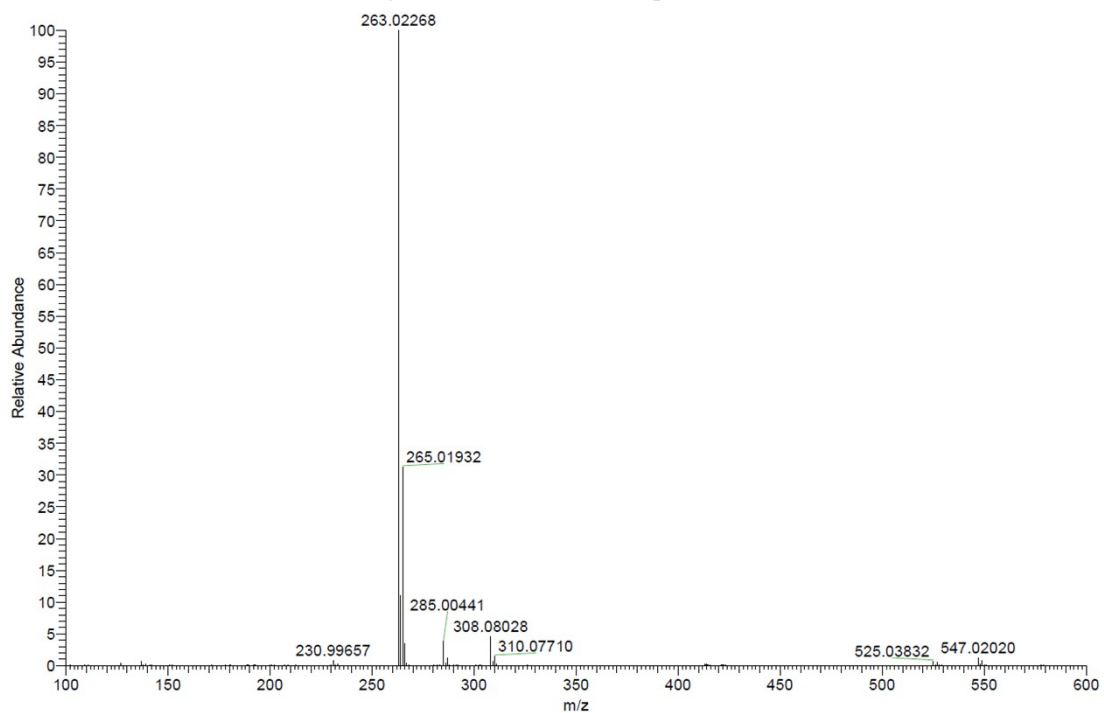

Fig.S 96 HRMS of compound **4i**

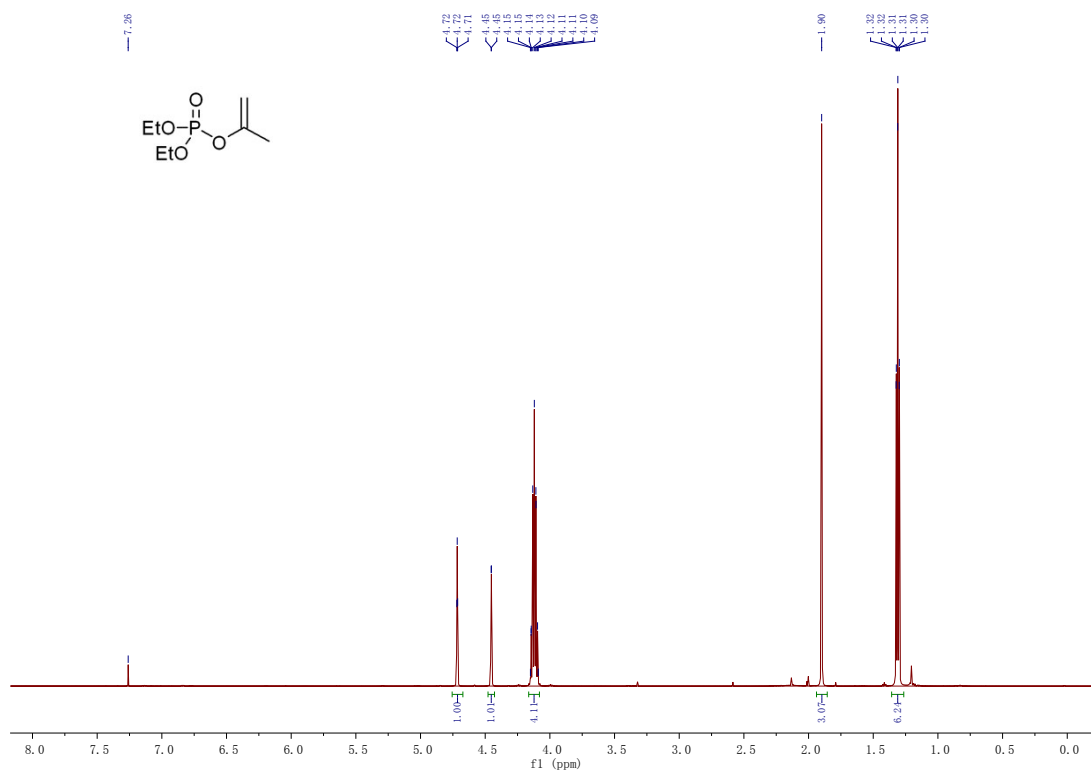

Fig.S 97 <sup>1</sup>H NMR of compound 5a

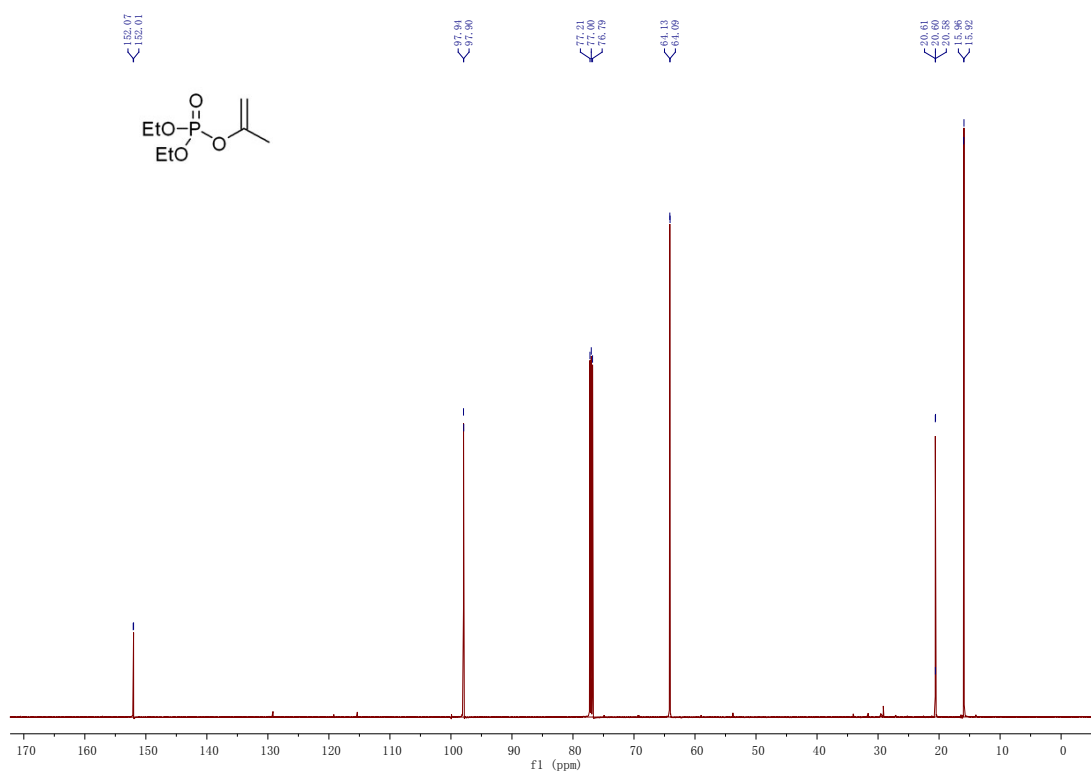

Fig.S 98 <sup>13</sup>C NMR of compound 5a

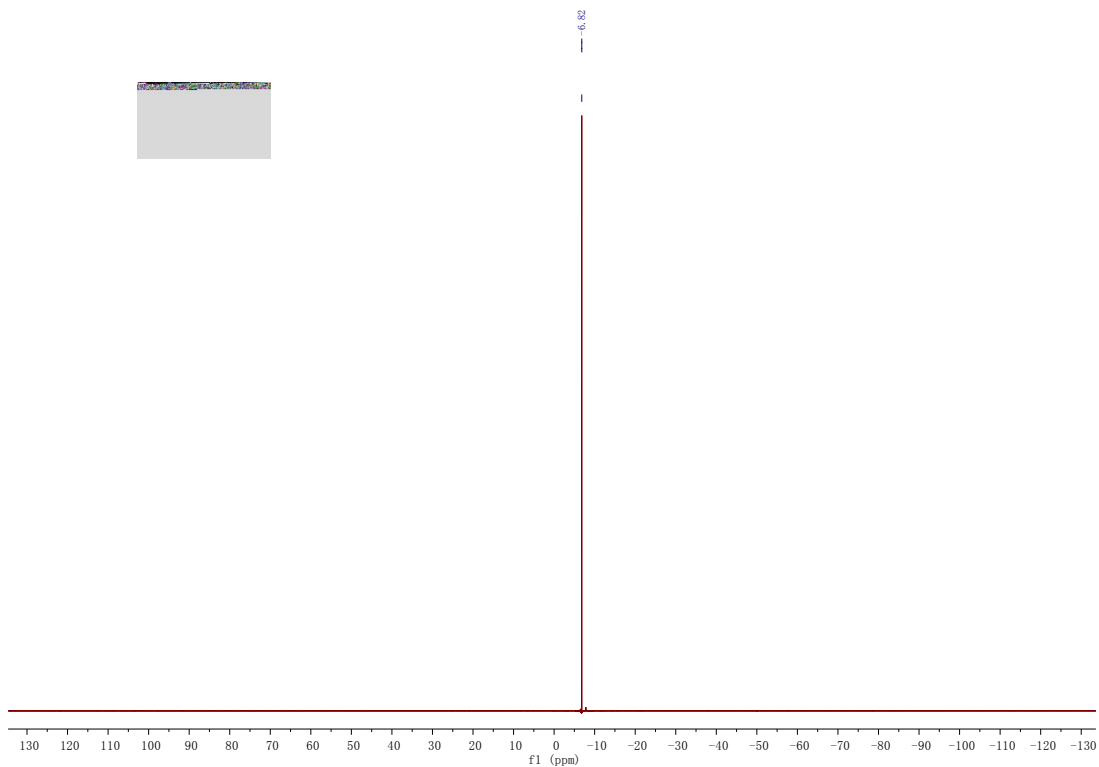

Fig.S 99  $^{31}\text{P}$  NMR of compound **5a**

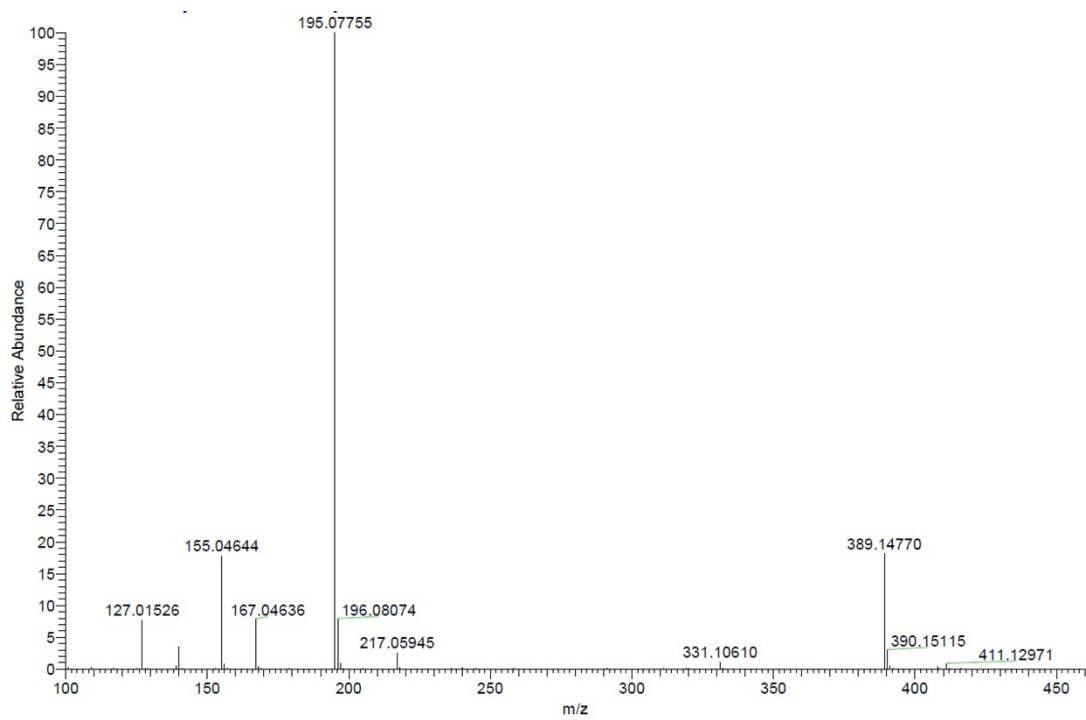

Fig.S 100 HRMS of compound **5a**

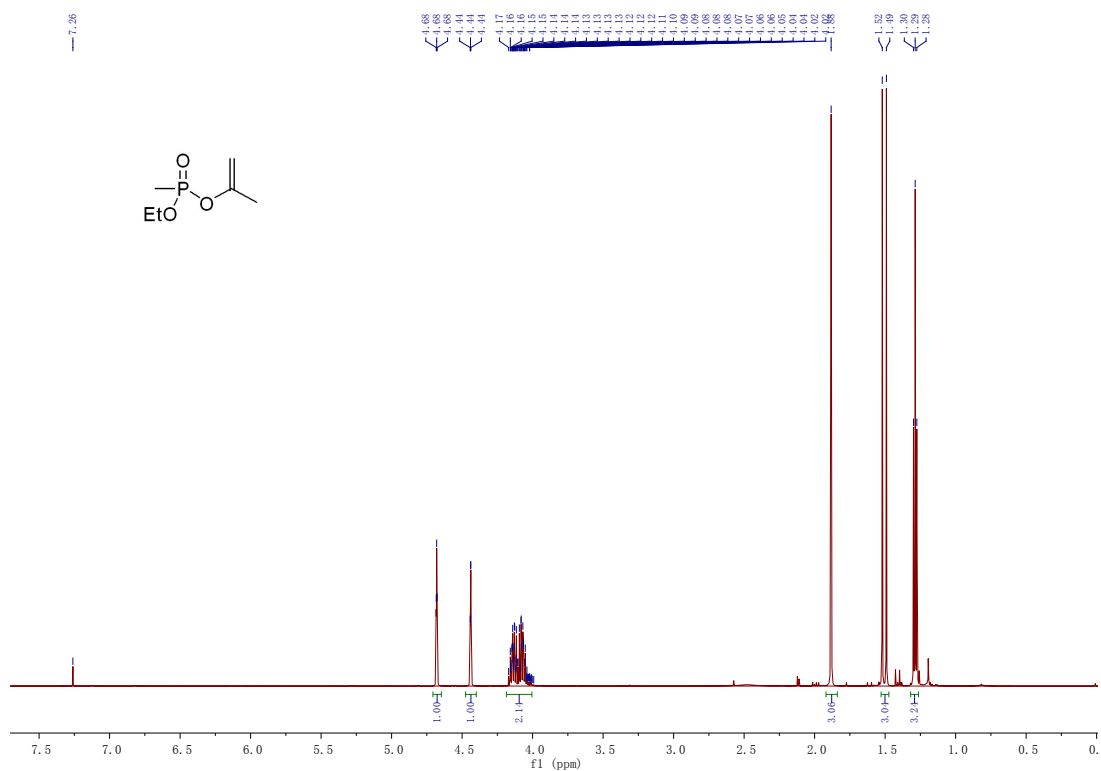

Fig.S 101  $^1\text{H}$  NMR of compound **5b**

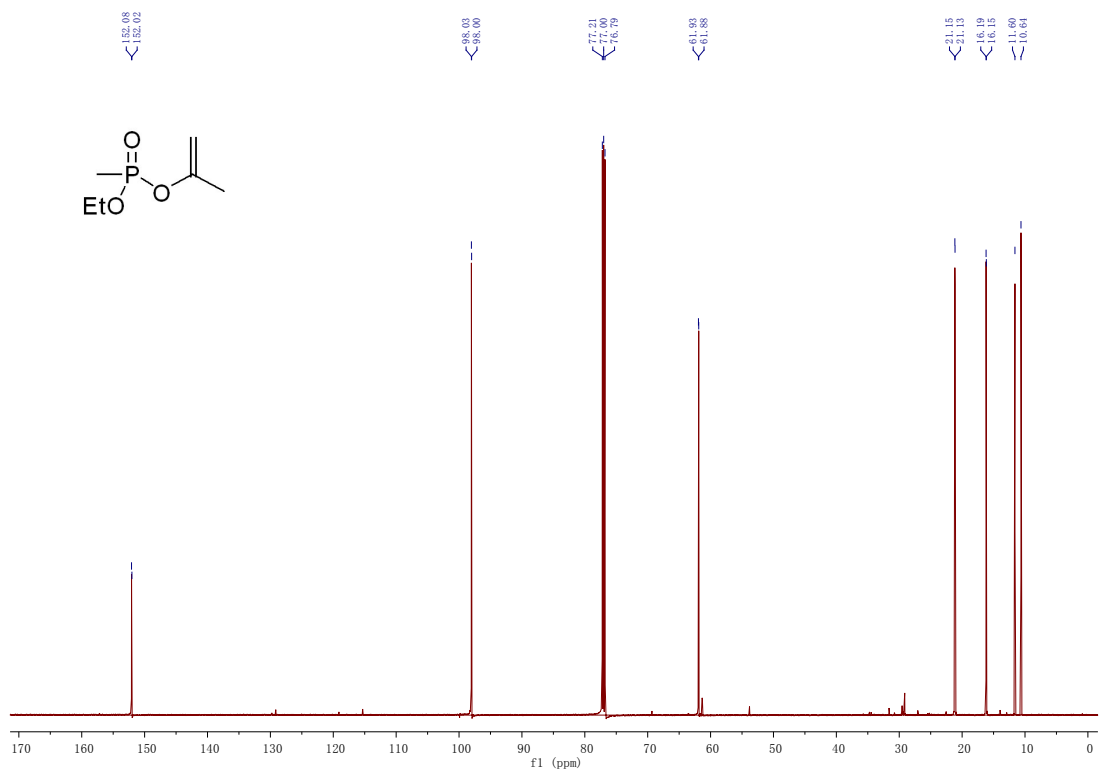

Fig.S 102  $^{13}\text{C}$  NMR of compound **5b**

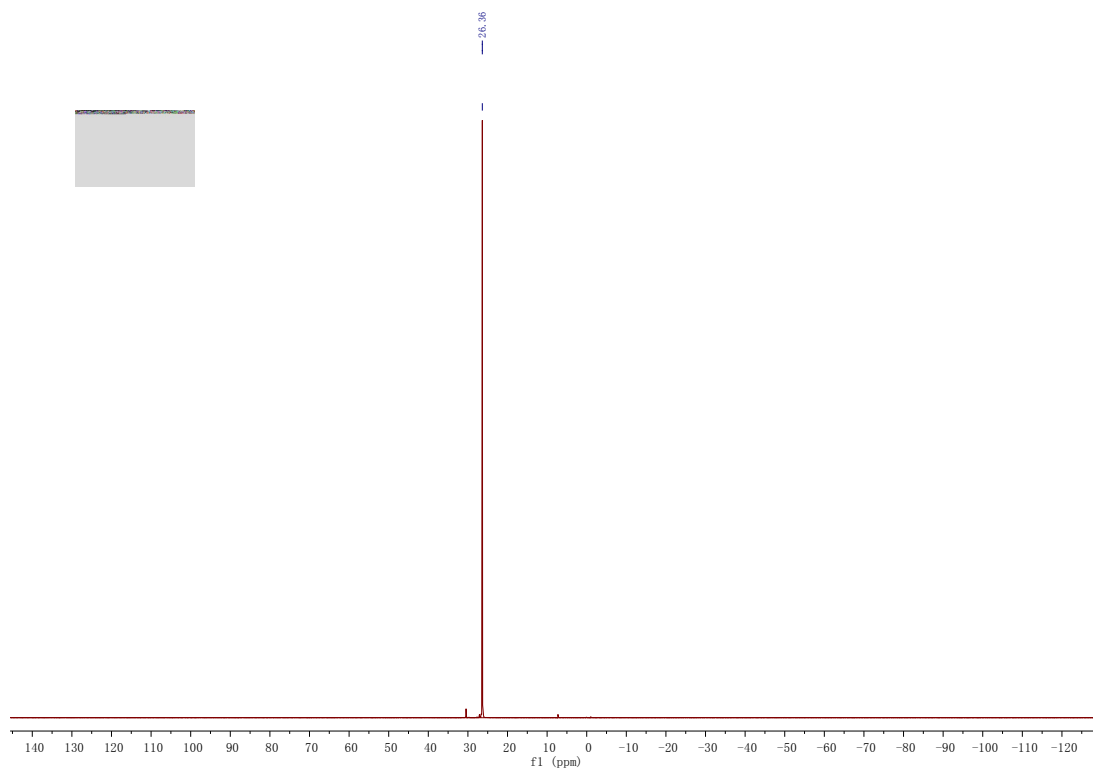

Fig.S 103  $^{31}\text{P}$  NMR of compound **5b**

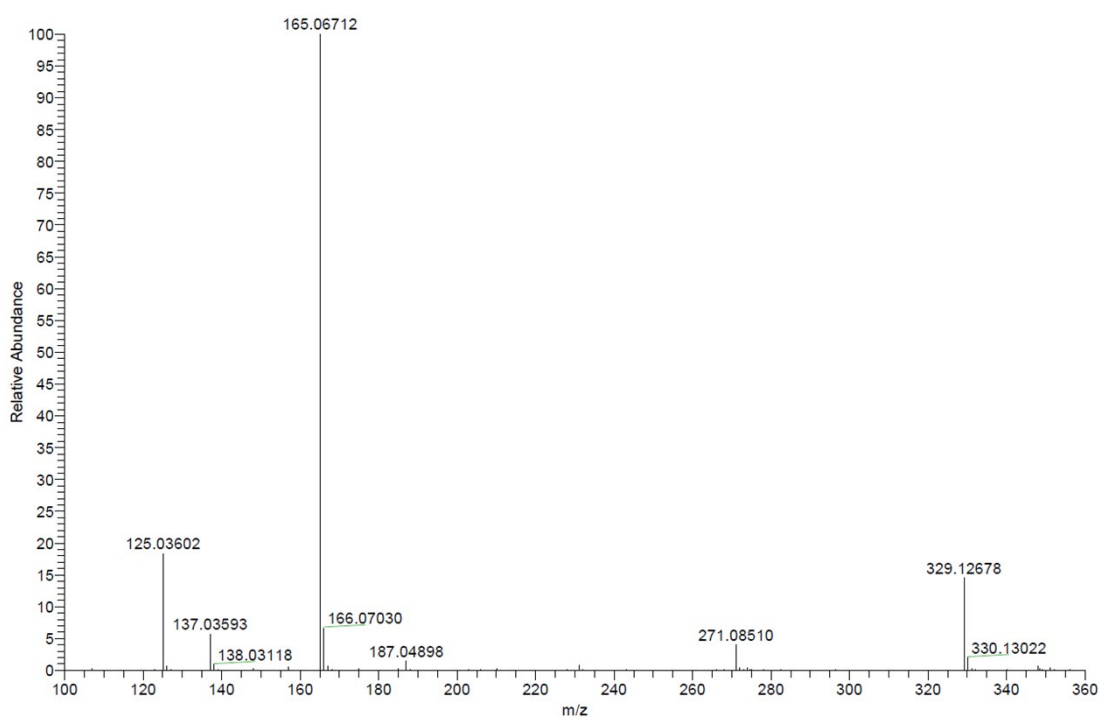

Fig.S 104 HRMS of compound **5b**

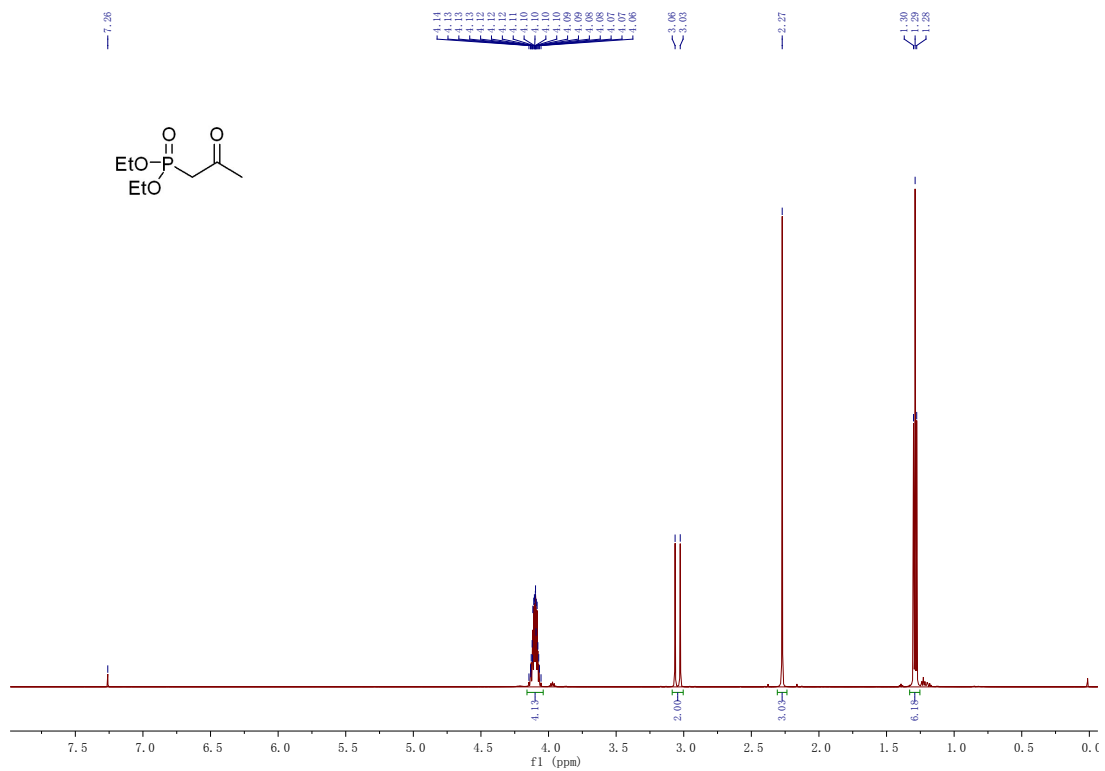

Fig.S 105  $^1\text{H}$  NMR of compound **6a**

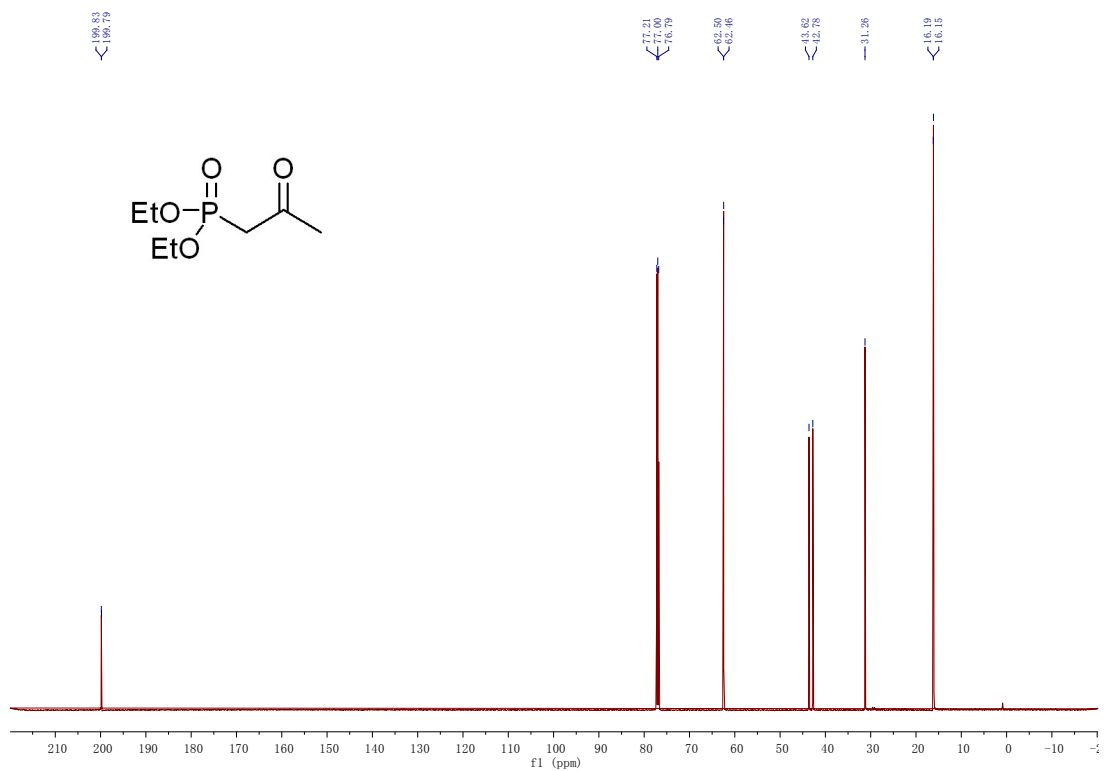

Fig.S 106  $^{13}\text{C}$  NMR of compound **6a**

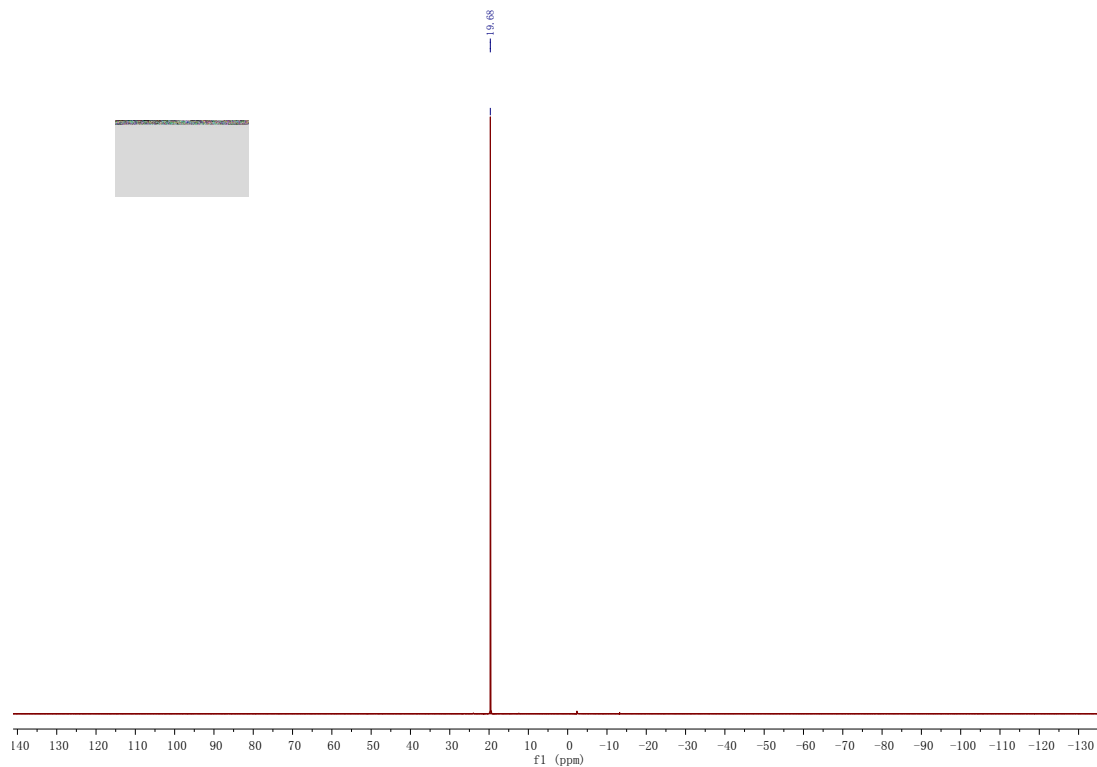

Fig.S 107  $^{31}\text{P}$  NMR of compound **6a**

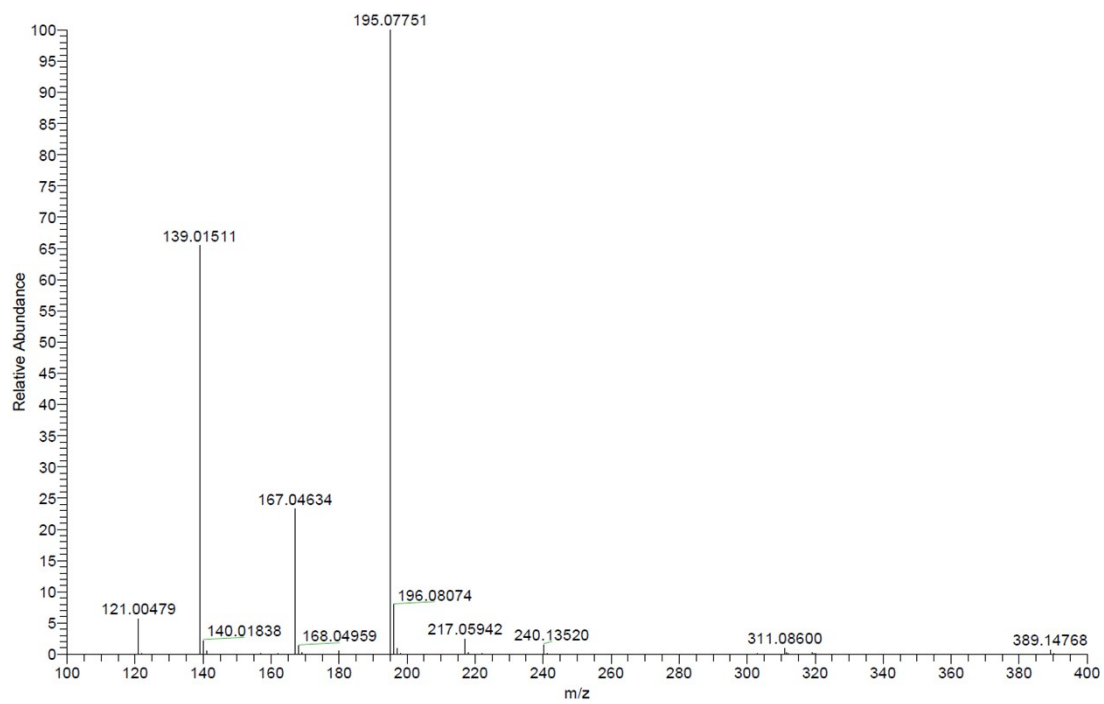

Fig.S 108 HRMS of compound **6a**
